# Supplementary material for: CO reduction by calcium and ytterbium hydride complexes with a bulky monodentate carbazolyl ligand
Source: Royal Society of Chemistry journal article supplement (doi:10.1039/d4cc03714f), 2024-01-01
Supplement: d4cc03714f1.pdf [file d4cc03714f1.pdf]

## Table of Contents

|       |                                                                                                                                           |    |
|-------|-------------------------------------------------------------------------------------------------------------------------------------------|----|
| 1     | General Considerations .....                                                                                                              | 2  |
| 2     | Syntheses.....                                                                                                                            | 3  |
| 2.1   | [( <sup>dtbp</sup> Cbz)CaN(SiMe <sub>3</sub> ) <sub>2</sub> (THF)] ( <b>1Ca</b> ) .....                                                   | 3  |
| 2.2   | [( <sup>dtbp</sup> Cbz)CaN(SiMe <sub>3</sub> ) <sub>2</sub> ] ( <b>2Ca</b> ).....                                                         | 6  |
| 2.3   | [( <sup>dtbp</sup> Cbz)Ca(C <sub>6</sub> H <sub>6</sub> )H] ( <b>3Ca</b> ·C <sub>6</sub> H <sub>6</sub> ) .....                           | 10 |
| 2.4   | [( <sup>dtbp</sup> Cbz)Ca(THF)COH] <sub>2</sub> ( <b>4Ca</b> ) .....                                                                      | 14 |
| 2.5   | [( <sup>dtbp</sup> Cbz)Yb(SiMe <sub>3</sub> ) <sub>2</sub> (THF)] ( <b>1Yb</b> ) .....                                                    | 16 |
| 2.6   | [( <sup>dtbp</sup> Cbz)Yb(C <sub>6</sub> H <sub>6</sub> )H] ( <b>3Yb</b> ·C <sub>6</sub> H <sub>6</sub> ) .....                           | 19 |
| 2.7   | [( <sup>dtbp</sup> Cbz) <sub>2</sub> Yb <sub>2</sub> L <sub>2</sub> (H <sub>2</sub> C <sub>2</sub> O <sub>2</sub> )] ( <b>4Yb</b> ) ..... | 20 |
| 2.8   | [( <sup>dtbp</sup> Cbz)CaD] ( <b>3Ca-D</b> ·C <sub>6</sub> H <sub>6</sub> ) .....                                                         | 21 |
| 3     | Crystallographic Details .....                                                                                                            | 22 |
| 4     | Computational Details .....                                                                                                               | 25 |
| 4.1   | Vibrational modes in <b>3Ca</b> ·C <sub>6</sub> H <sub>6</sub> and <b>3Yb</b> ·C <sub>6</sub> H <sub>6</sub> .....                        | 25 |
| 4.2   | Optimised Structures .....                                                                                                                | 28 |
| 4.2.1 | ( <sup>dtbp</sup> Cbz)CaN(SiMe <sub>3</sub> ) <sub>2</sub> .....                                                                          | 28 |
| 4.2.2 | [( <sup>dtbp</sup> Cbz)CaN(SiMe <sub>3</sub> ) <sub>2</sub> ] <sub>2</sub> .....                                                          | 29 |
| 4.2.3 | [( <sup>dtbp</sup> Cbz)Ca(C <sub>6</sub> H <sub>6</sub> )H] <sub>2</sub> .....                                                            | 33 |
| 4.2.4 | [( <sup>dtbp</sup> Cbz)Yb(C <sub>6</sub> H <sub>6</sub> )H] <sub>2</sub> .....                                                            | 37 |
| 4.2.5 | [( <sup>dtbp</sup> Cbz)Ca(C <sub>6</sub> H <sub>6</sub> )H] <sub>2</sub> – C <sub>6</sub> H <sub>6</sub> removed .....                    | 40 |
| 4.2.6 | [( <sup>dtbp</sup> Cbz)Ca(C <sub>6</sub> H <sub>6</sub> )H] <sub>2</sub> – flanking arene removed.....                                    | 43 |
| 5     | References .....                                                                                                                          | 45 |

## 1 General Considerations

Et<sub>2</sub>O (Sigma-Aldrich), THF (Roth, 99%), n-hexane (Roth, 98%) and toluene (Roth, 99%) were dried over sodium and distilled prior to use. C<sub>6</sub>D<sub>6</sub> and THF-D<sub>8</sub> (Eurisotop) were dried over sodium and distilled prior to use.

Starting materials were prepared according to literature protocols: RH,<sup>[1]</sup> [Ca{N(SiMe<sub>3</sub>)<sub>2</sub>}<sub>2</sub>(THF)<sub>2</sub>],<sup>[2]</sup> Yb{N(SiMe<sub>3</sub>)<sub>2</sub>}<sub>2</sub>(THF)<sup>[3]</sup>, PhSiD<sub>3</sub>.<sup>[4]</sup>

NMR spectra were acquired on a Bruker Avance 400 MHz spectrometer. Reported chemical shifts are referenced to the <sup>1</sup>H and <sup>13</sup>C NMR resonances of the deuterated solvent.<sup>[5]</sup> Coupling constants *J* are given in Hertz as positive values regardless of their real individual sign. <sup>1</sup>H, <sup>11</sup>B, <sup>13</sup>C, <sup>15</sup>N, <sup>19</sup>F, <sup>29</sup>Si NMR spectra were obtained at 400.1, 128.4, 100.6, 40.6, 376.5, 79.5 MHz, respectively.

IR spectra were recorded on a Bruker Alpha spectrometer using the attenuated total reflection (ATR) technique on powdered samples.

Raman spectra were recorded in the region 4000-20 cm<sup>-1</sup> on a *Bruker MultiRam* spectrometer equipped with a Nd:YAG laser (λ = 1064 nm) and a germanium detector at a resolution of 2 cm<sup>-1</sup>. The powdered crystalline sample materials were flame sealed in a glass tube. The laser energy was adjusted to 100 mW.

Elemental analyses were obtained with a Vario Micro Cube (Elementar Analysensysteme GmbH) in the institutional technical laboratories of the Karlsruhe Institute of Technology (KIT).

Single crystals were mounted in perfluoropolyalkyl ether oil on a cryo loop and then brought into the cold nitrogen stream of a low-temperature device (Oxford Cryosystems Cryostream unit) so that the oil solidified. Diffraction data were collected using a Stoe IPDS II diffractometer and graphite-monochromated Mo-Kα (0.71073 Å) radiation or a Stoe STADIVARI diffractometer and Ga-Kα (1.34134 Å) radiation. The structures were solved by direct methods with SHELXS<sup>[6]</sup> or intrinsic phasing with SHELXT<sup>[7]</sup> followed by full-matrix least-squares refinement using SHELXL-2018/3<sup>[8]</sup> and the ShelXle GUI.<sup>[9]</sup> All non-hydrogen atoms were refined anisotropically. The contribution of the hydrogen atoms, in their calculated positions, was included in the refinement using a riding model.

## 2 Syntheses

### 2.1 [<sup>dtbp</sup>Cbz)CaN(SiMe<sub>3</sub>)<sub>2</sub>(THF)] (1Ca)

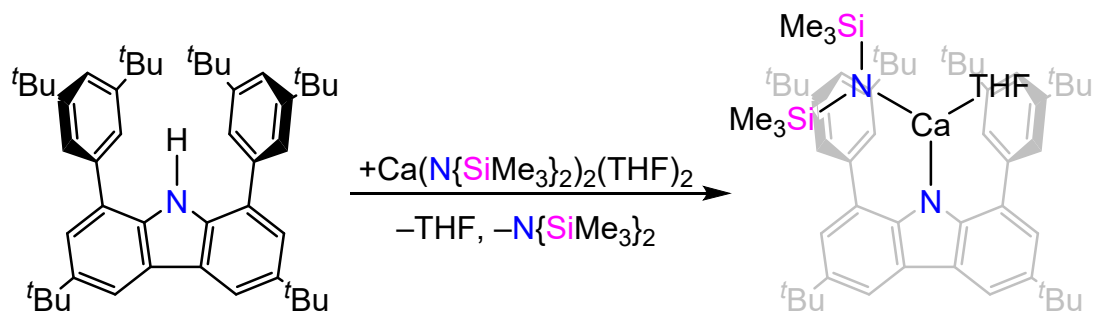

As solids, <sup>dtbp</sup>CbzH (400 mg, 0.610 mmol) and Ca[N(SiMe<sub>3</sub>)<sub>2</sub>]<sub>2</sub>(THF)<sub>2</sub> (296 mg, 0.586 mmol) were combined. To the mixture, 9 mL of toluene were added via syringe. The resulting solution quickly turned dark yellow and was stirred overnight at ambient temperature. Then, the solvent was evaporated and the crude product was treated with 13 mL *n*-hexane, filtered and concentrated until approximately 3 mL. Within one night, suitable crystals were obtained. The crystals were washed with 1 mL *n*-hexane and briefly dried in vacuo (176 mg, 0.189 mmol). A second fraction could be obtained by concentrating the mother liquor (46 mg, 0.049 mmol). Crystalline yield: 222 mg, 0.239 mmol, 41%. The characterisation data were obtained from the crystalline material.

**<sup>1</sup>H NMR** (400 MHz, C<sub>6</sub>D<sub>6</sub>):  $\delta$  (ppm) = -0.18 (s, 18 H, Si(CH<sub>3</sub>)<sub>3</sub>), 0.99 (br, 4 H, OCCH<sub>2</sub>), 1.43 (s, 36 H, Ar-C(CH<sub>3</sub>)<sub>3</sub>), 1.52 (s, 18 H, Carb-C(CH<sub>3</sub>)<sub>3</sub>), 2.83 (br, 4 H, OCH<sub>2</sub>), 7.62 (t, 2 H, <sup>4</sup>J<sub>HH</sub> = 1.9 Hz, *p*-CH), 7.64 (d, 2 H, <sup>4</sup>J<sub>HH</sub> = 2.0 Hz, C<sup>2,7</sup>H), 8.10 (d, 4 H, <sup>4</sup>J<sub>HH</sub> = 1.9 Hz, *o*-CH), 8.52 (d, 2 H, <sup>4</sup>J<sub>HH</sub> = 2.0 Hz, C<sup>2,7</sup>H).

**<sup>13</sup>C{<sup>1</sup>H} NMR** (100.7 MHz, C<sub>6</sub>D<sub>6</sub>):  $\delta$  (ppm) = 5.26 (s, Si(CH<sub>3</sub>)<sub>3</sub>), 24.72 (s, OCCH<sub>2</sub>), 31.97 (s, Ar-C(CH<sub>3</sub>)<sub>3</sub>), 32.46 (s, Carb-C(CH<sub>3</sub>)<sub>3</sub>), 34.76 (s, Carb-C(CH<sub>3</sub>)<sub>3</sub>), 35.32 (s, Ar-C(CH<sub>3</sub>)<sub>3</sub>), 69.04 (s, OCH<sub>2</sub>), 116.18 (s, CH), 123.29 (s, CH), 123.84 (s, CH), 125.42 (s, CH), 127.03 (s), 139.46 (s), 142.60 (s), 147.34 (s), 152.71 (s).

**<sup>29</sup>Si NMR** (79.5 MHz, C<sub>6</sub>D<sub>6</sub>):  $\delta$  (ppm) = -15.6 (s, Si(CH<sub>3</sub>)<sub>3</sub>).

**EA found** (calc. for C<sub>58</sub>H<sub>90</sub>N<sub>2</sub>OSi<sub>2</sub>Ca): C 74.66 (75.10), H 9.69 (9.78), N 2.69 (3.02).

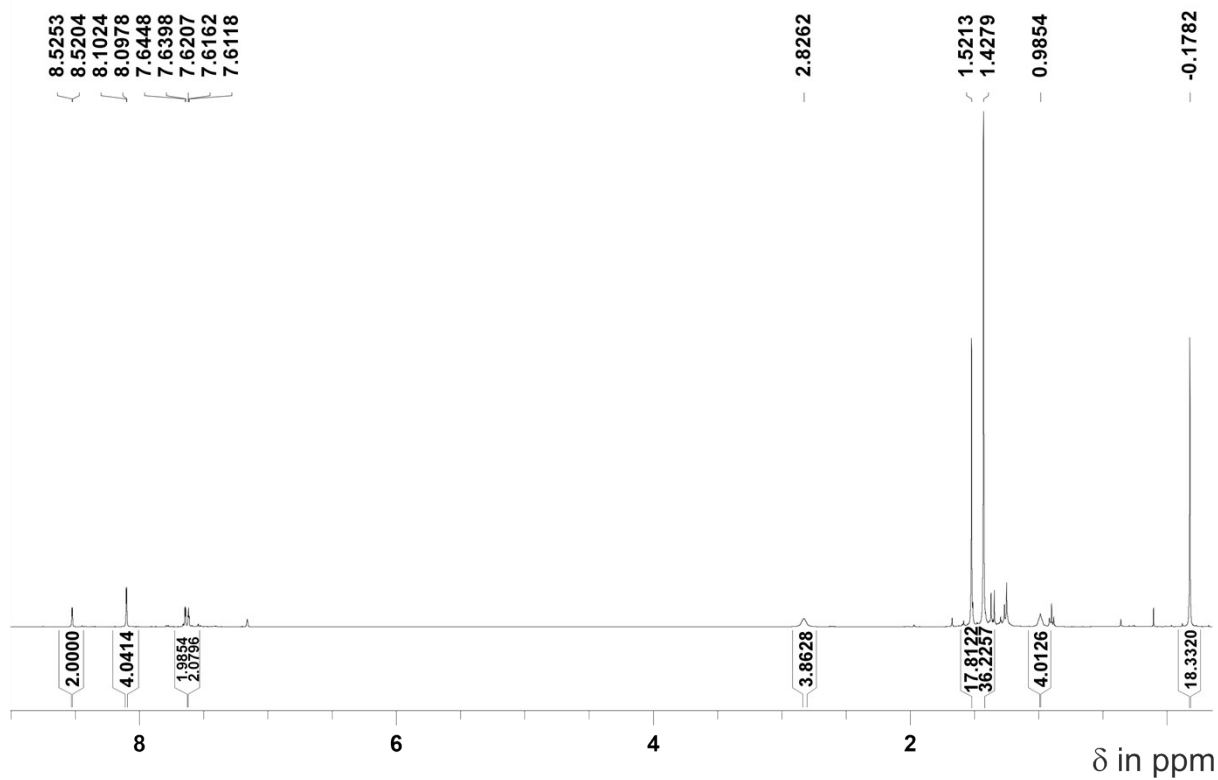

Figure S1:  $^1\text{H}$  NMR spectrum of **1Ca**.

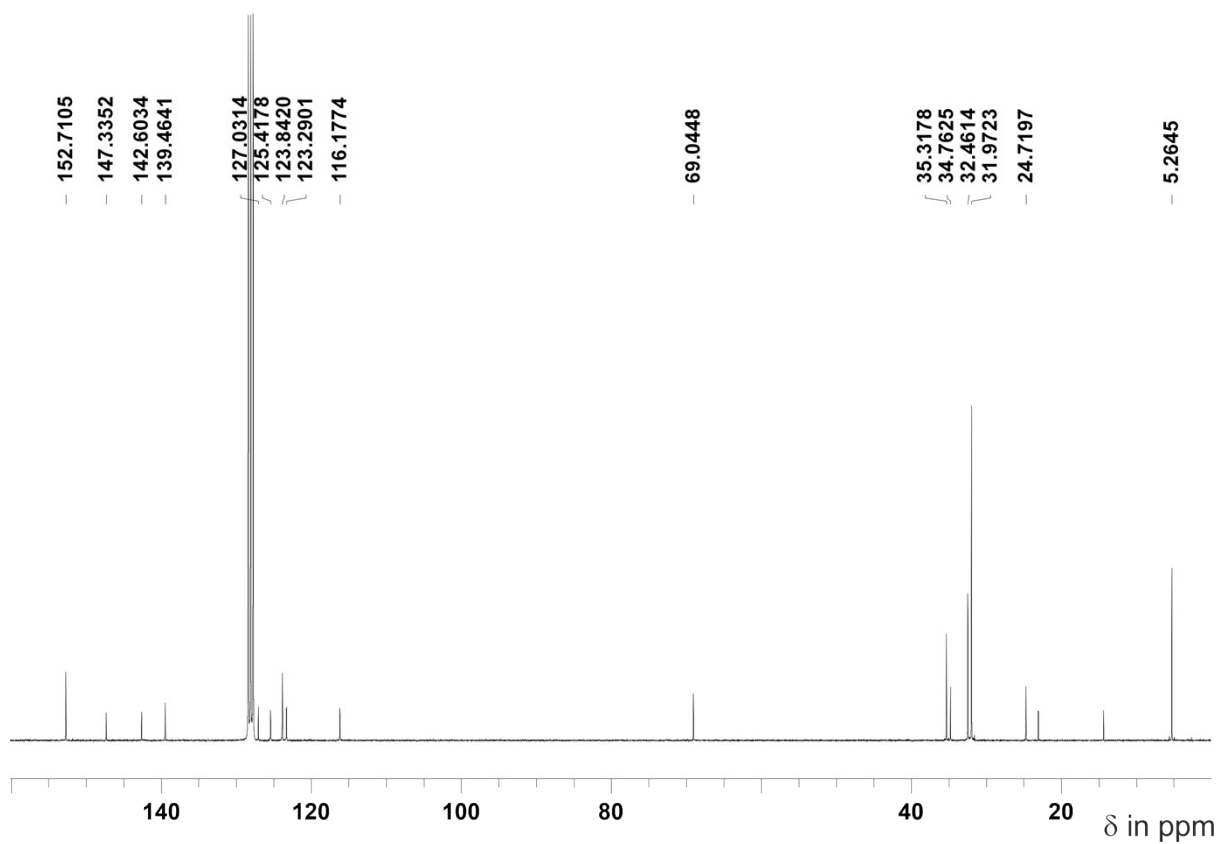

Figure S2:  $^{13}\text{C}\{^1\text{H}\}$  NMR spectrum of **1Ca**.

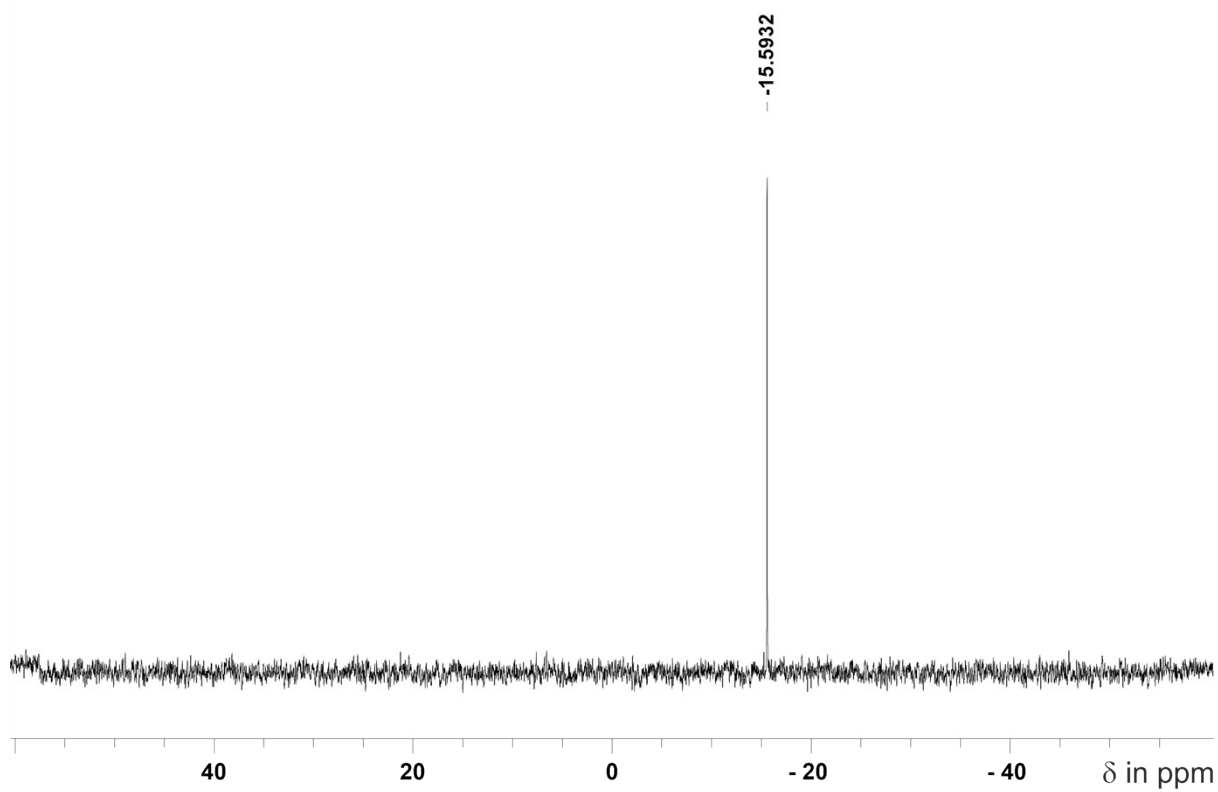

Figure S3:  $^{29}\text{Si}\{^1\text{H}\}$  NMR spectrum of **1Ca**.

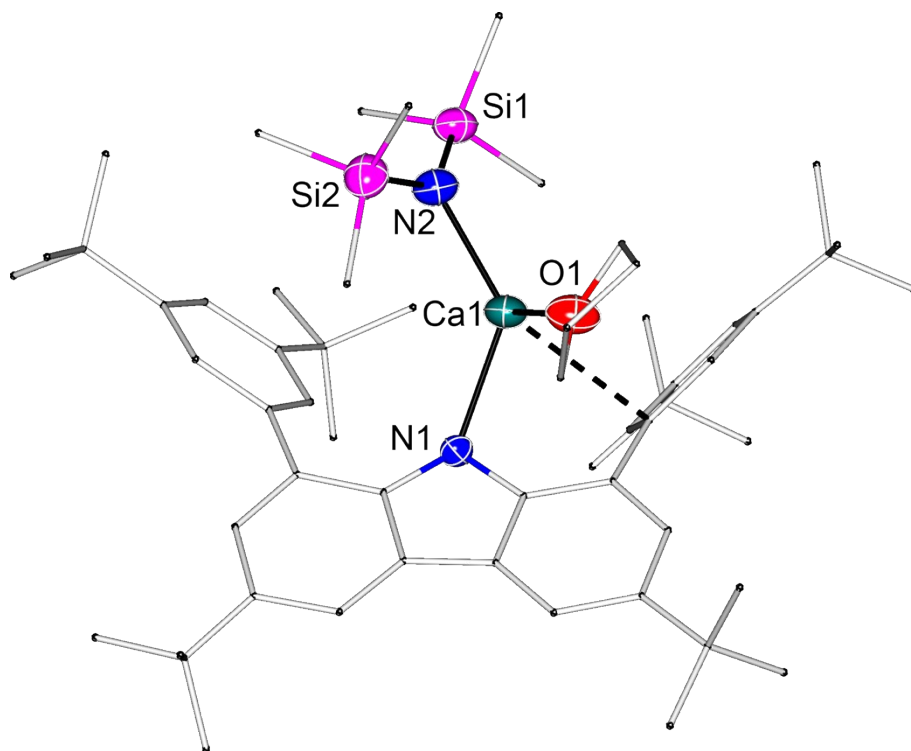

Figure S4: Molecular structure of **1Ca**.

## 2.2 [(<sup>dtbp</sup>Cbz)CaN(SiMe<sub>3</sub>)<sub>2</sub>] (2Ca)

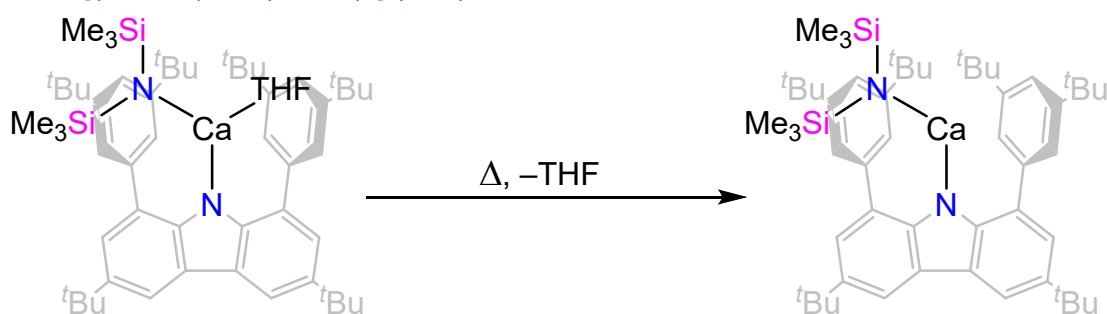

a) A finely ground sample of (<sup>dtbp</sup>Cbz)CaN(SiMe<sub>3</sub>)<sub>2</sub>(THF) (120 mg, 0.129 mmol) was dried for 20 hours at 120 °C in a dynamic rotary vane pump vacuum. No colour change occurred. The crude product (107 mg, 0.125 mmol) was recrystallised from a minimal amount of *n*-hexane to obtain single crystals suitable for XRD experiments.

b) Alternatively, transamination with <sup>dtbp</sup>CbzH and Ca[N(SiMe<sub>3</sub>)<sub>2</sub>]<sub>2</sub> works as well. Ca[N(SiMe<sub>3</sub>)<sub>2</sub>]<sub>2</sub> is prepared by drying Ca[N(SiMe<sub>3</sub>)<sub>2</sub>]<sub>2</sub>(THF)<sub>2</sub> at 115 °C for nine hours. <sup>dtbp</sup>CbzH (562 mg, 0.857 mmol) and Ca[N(SiMe<sub>3</sub>)<sub>2</sub>]<sub>2</sub> (308 mg, 0.853 mmol) were dissolved in 11 mL toluene and the mixture was stirred overnight at ambient temperature. All volatiles were removed in *vacuo* and the residue was treated with 22 mL *n*-hexane, filtered and concentrated to a few milliliters. Crystallization occurred within one night. The yellow crystals were washed with *n*-hexane and briefly dried. Crystalline yield: 384 mg, 0.449 mmol, 52%. The characterisation data were obtained from the crystalline material.

<sup>1</sup>H NMR (400 MHz, C<sub>6</sub>D<sub>6</sub>): δ (ppm) = -0.26 (s, 18 H, Si(CH<sub>3</sub>)<sub>3</sub>), 1.32 (s, 36 H, Ar-C(CH<sub>3</sub>)<sub>3</sub>), 1.56 (s, 18 H, Carb-C(CH<sub>3</sub>)<sub>3</sub>), 7.59 (t, 2 H, <sup>4</sup>J<sub>HH</sub> = 1.9 Hz, *p*-CH), 7.67 (d, 2 H, <sup>4</sup>J<sub>HH</sub> = 2.0 Hz, C<sup>2,7</sup>H), 7.99 (d, 4 H, <sup>4</sup>J<sub>HH</sub> = 1.9 Hz, *o*-CH), 8.61 (d, 2 H, <sup>4</sup>J<sub>HH</sub> = 2.0 Hz, C<sup>2,7</sup>H).

<sup>13</sup>C{<sup>1</sup>H} NMR (100.7 MHz, C<sub>6</sub>D<sub>6</sub>): δ (ppm) = 5.24 (s, Si(CH<sub>3</sub>)<sub>3</sub>), 31.91 (s, Ar-C(CH<sub>3</sub>)<sub>3</sub>), 32.51 (s, Carb-C(CH<sub>3</sub>)<sub>3</sub>), 34.82 (s, Carb-C(CH<sub>3</sub>)<sub>3</sub>), 35.37 (s, Ar-C(CH<sub>3</sub>)<sub>3</sub>), 116.47 (s, CH), 123.31 (s, CH), 123.71 (s, CH), 124.60 (s, CH), 126.69 (s), 127.57 (s), 139.43 (s), 143.61 (s), 147.54 (s), 153.39 (s).

<sup>29</sup>Si NMR (79.5 MHz, C<sub>6</sub>D<sub>6</sub>): δ (ppm) = -15.5 (s, Si(CH<sub>3</sub>)<sub>3</sub>).

IR (ATR)  $\tilde{\nu}$  (cm<sup>-1</sup>) = 2954 (S), 2867 (VW), 2229 (VW), 2199 (VW), 2180 (VW), 2123 (VW), 2083 (VW), 1990 (VW), 1978 (VW), 1966 (VW), 1589 (W), 1462 (W), 1391 (VW), 1362 (M), 1286 (W), 1237 (S), 1181 (VW), 1151 (VW), 1055 (M), 931 (VW), 867 (S), 821 (VS), 763 (W), 718 (M), 698 (VW), 664 (W), 643 (VW), 595 (W), 566 (VW), 544 (VW), 504 (VW), 467 (W), 426 (W), 411 (W), 390 (M).

EA found (calc. for C<sub>54</sub>H<sub>82</sub>N<sub>2</sub>Si<sub>2</sub>Ca): C 75.94 (75.81), H 9.38 (9.66), N 3.12 (3.27).

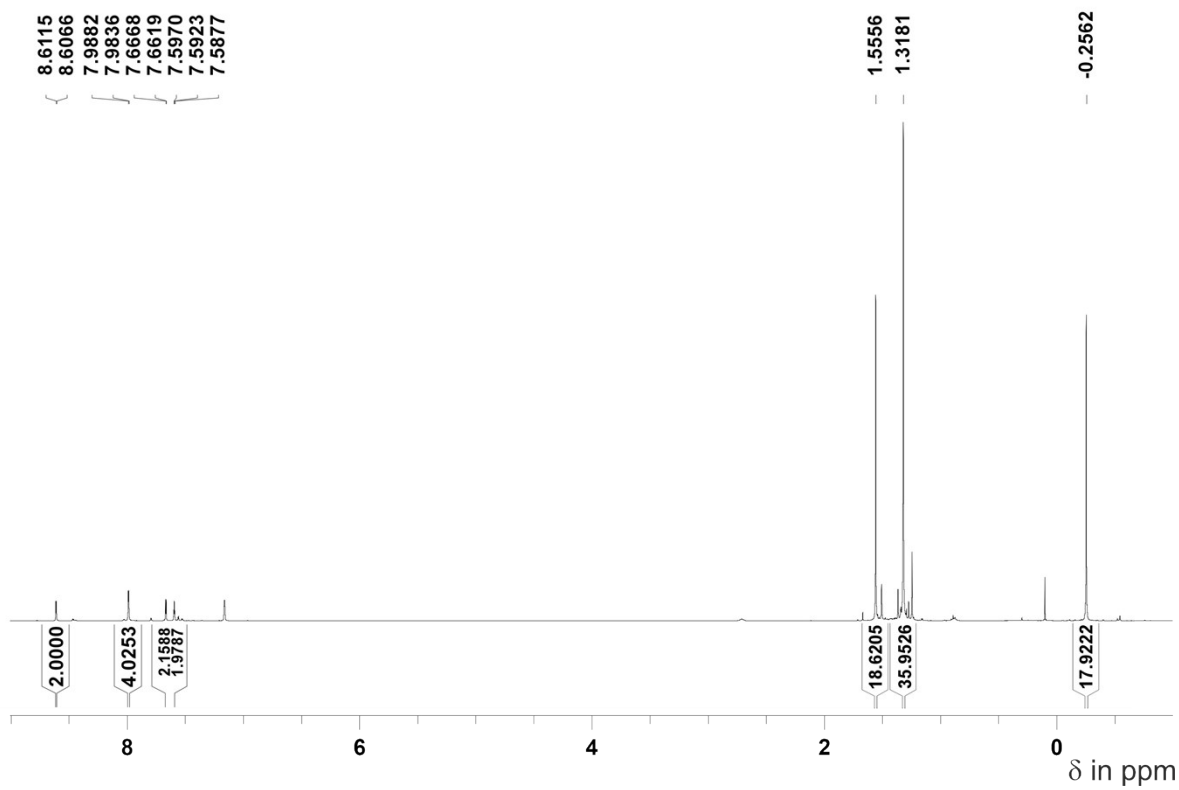

Figure S5:  $^1\text{H}$  NMR spectrum of **2Ca**.

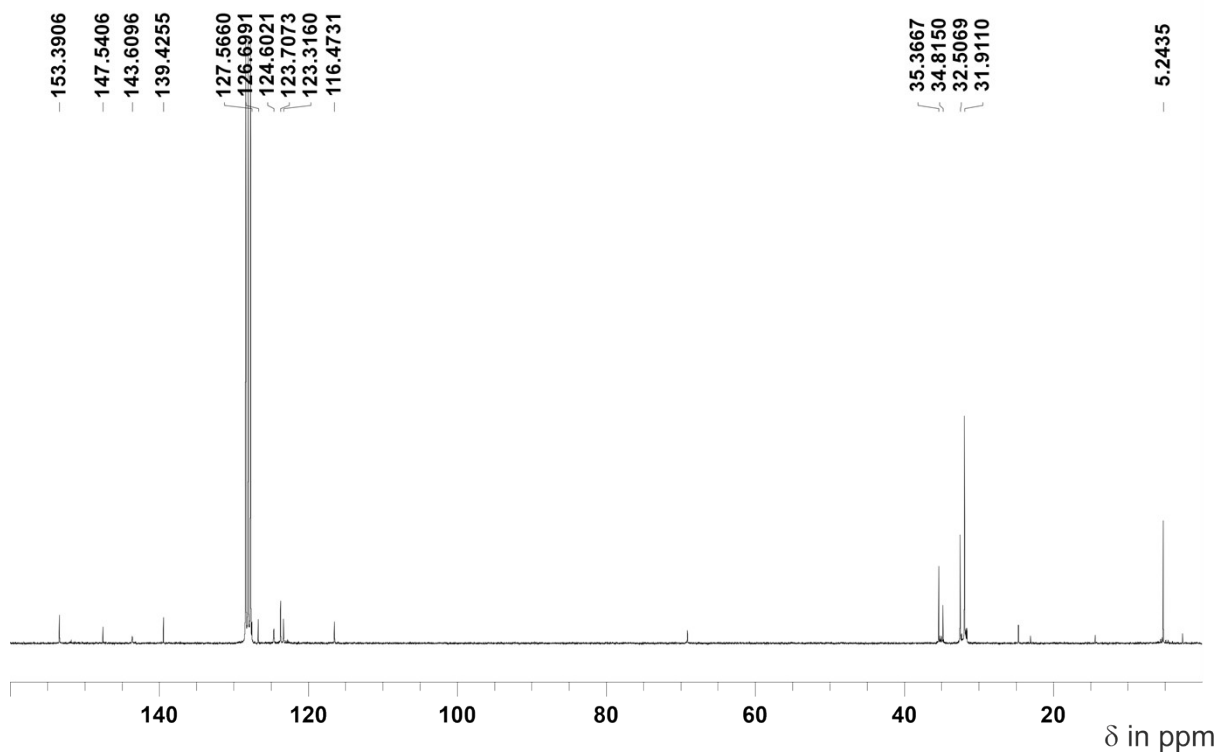

Figure S6:  $^{13}\text{C}\{^1\text{H}\}$  NMR spectrum of **2Ca**.

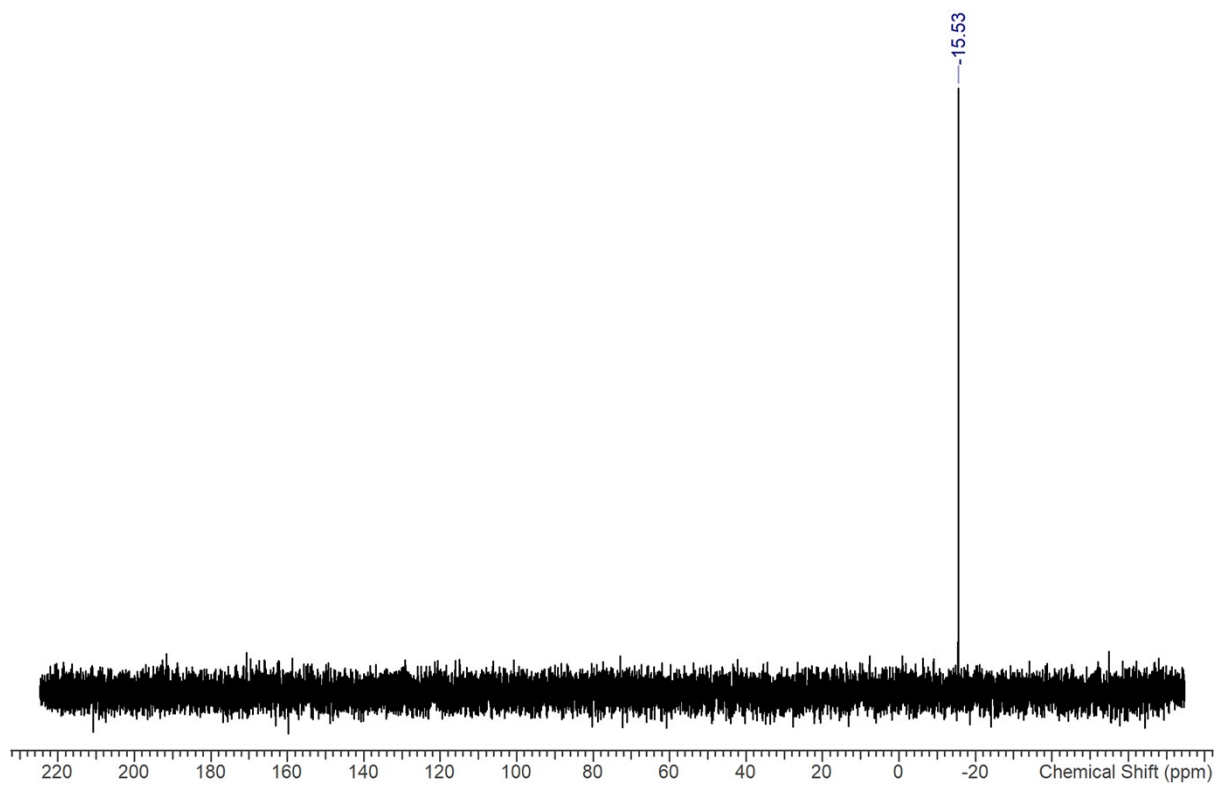

Figure S7:  $^{29}\text{Si}\{^1\text{H}\}$  NMR spectrum of **2Ca**.

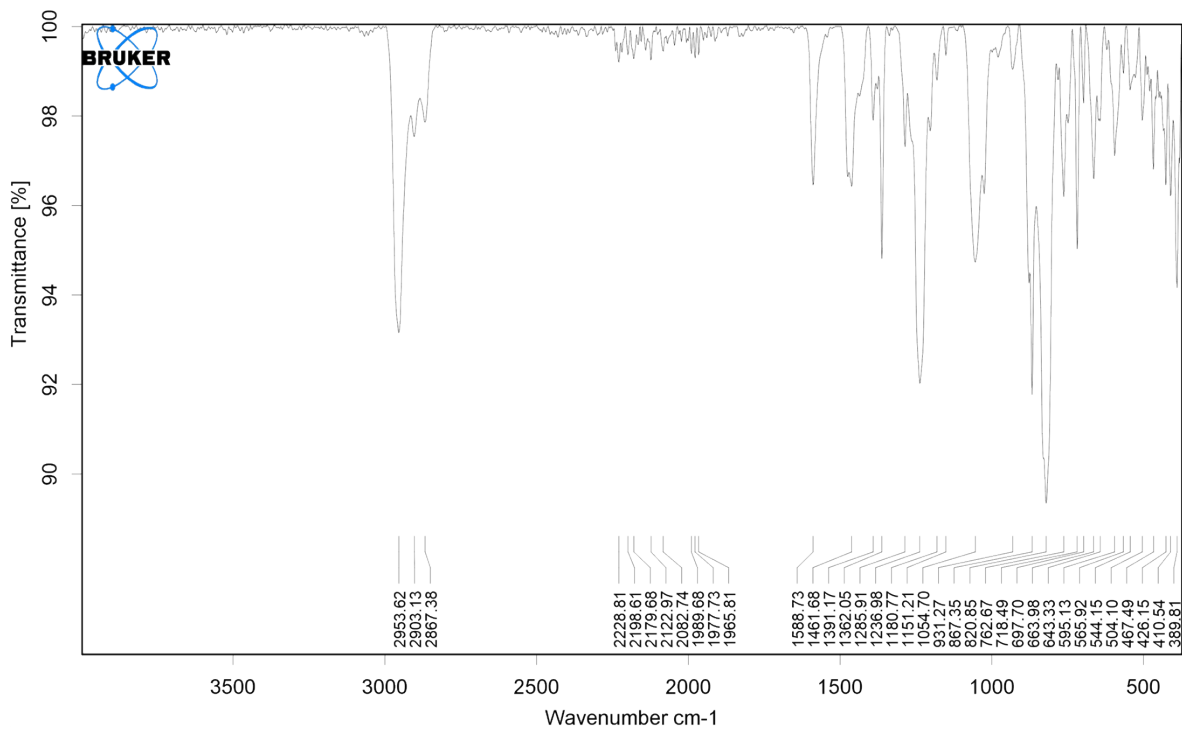

Figure S8: IR spectrum of **2Ca**.



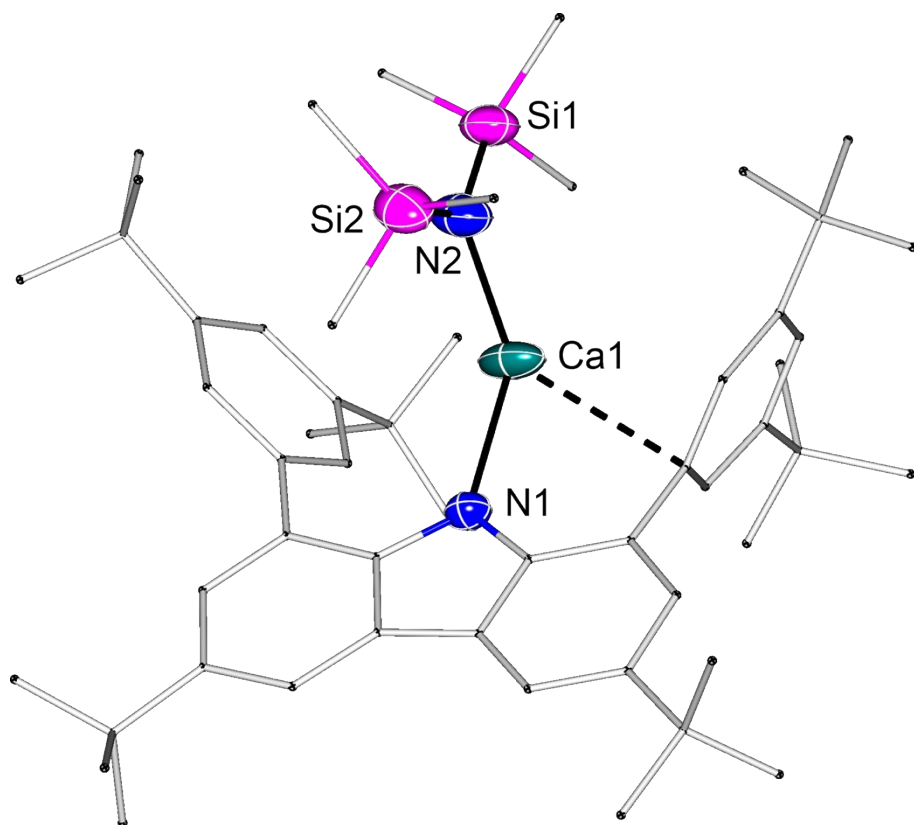

Figure S9: Molecular structure of **2Ca**.

### 2.3 $[(\text{dtbpCbz})\text{Ca}(\text{C}_6\text{H}_6)\text{H}] (\mathbf{3Ca}\cdot\text{C}_6\text{H}_6)$

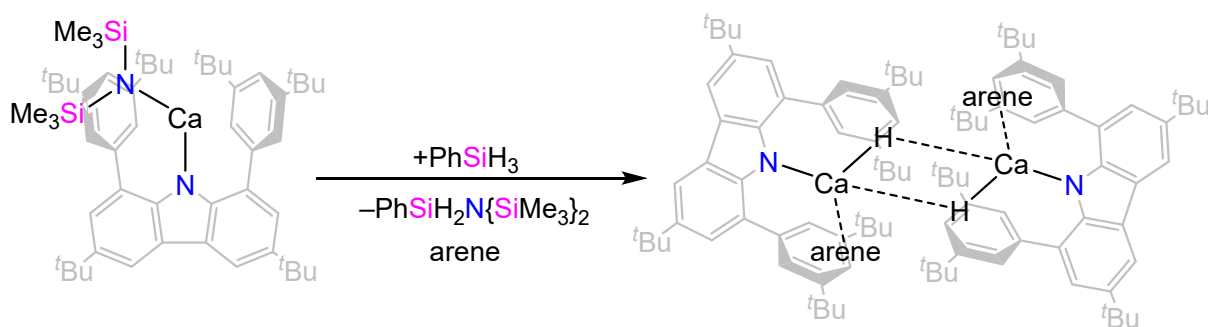

The amide **2Ca** (388 mg, 0.454 mmol) was dissolved in 1.6 mL of benzene. To that solution, phenylsilane (87.7 mg, 100  $\mu\text{L}$ , 0.810 mmol, 1.78 eq.) was added via microsyringe. The mixture was shaken and then left undisturbed overnight. The hydride **3Ca** $\cdot\text{C}_6\text{H}_6$  crystallized within one night. Afterwards, the supernatant was removed via syringe, the crystals were washed multiple times with *n*-hexane and briefly dried. Crystalline yield: 153 mg, 0.110 mmol, 48%. The characterisation data were obtained from the crystalline material.

In the same reaction, **1Ca** can be used as starting material, and  $[(\text{dtbpCbz})\text{CaH}\cdot\text{THF}] (\mathbf{3Ca}\cdot\text{THF})$  is obtained.

Due to the poor solubility of compound **3Ca**, only  $^1\text{H}$  NMR solution characterisation was performed.

$^1\text{H}$  NMR (400 MHz,  $\text{C}_6\text{D}_6$ ):  $\delta$  (ppm) = 1.46 (br s, 36 H,  $\nu_{1/2} = 37$  Hz, Ar- $\text{C}(\text{CH}_3)_3$ ), 1.53 (s, 18 H,  $\nu_{1/2} = 1.3$  Hz, Carb- $\text{C}(\text{CH}_3)_3$ ), **2.07** (s, 1 H,  $\nu_{1/2} = 7.1$  Hz, CaH), 7.46 (d, 2 H,  $^4J_{\text{HH}} = 1.9$  Hz,  $\text{C}^{2,7}\text{H}$ ), 7.58 (br s, 2 H,  $\nu_{1/2} = 4.6$  Hz, *p*-CH), 7.87 (br s, 4 H,  $\nu_{1/2} = 5.9$  Hz, *o*-CH), 8.51 (d, 2 H,  $^4J_{\text{HH}} = 1.9$  Hz,  $\text{C}^{4,5}\text{H}$ ).

MP ( $^\circ\text{C}$ ): 210 (darkened), 280 (dec.).

IR (ATR)  $\tilde{\nu}$  ( $\text{cm}^{-1}$ ) = 386 (M), 404 (W), 417 (W), 459 (W), 500 (M), 519 (W), 556 (VS), 644 (M), 679 (S), 699 (S), 707 (S), 714 (S), 785 (M), 825 (W), 846 (M), 866 (S), 899 (W), 933 (W), 981 (W), 1035 (M), 1069 (S), 1151 (W), 1182 (W), 1201 (M), 1230 (S), 1245 (M), 1267 (M), 1286 (M), 1361 (S), 1381 (W), 1392 (M), 1432 (W), 1463 (M), 1476 (M), 1588 (M), 2866 (M), 2903 (M), 2954 (S), 3035 (VW), 3068 (VW).

Raman ( $\text{cm}^{-1}$ ): 69 (100), 93 (93), 150 (45), 210 (25), 222 (25), 251 (13), 368 (8), 391 (7), 433 (7), 519 (8), 550 (19), 609 (7), 619 (6), 700 (7), 783 (15), 798 (6), 825 (26), 854 (11), 868 (7), 883 (7), 897 (11), 924 (26), 999 (50), 1026 (7), 1099 (13), 1151 (11), 1178 (10), 1201 (24), 1253 (37), 1267 (23), 1288 (17), 1317 (80), 1338 (37), 1363 (13), 1396 (16), 1446 (27), 1466 (26), 1550 (19), 1568 (29), 1593 (75), 1616 (14), 2710 (8), 2779 (67), 2866 (22), 2904 (46), 2927 (34), 2960 (43), 3066 (13).

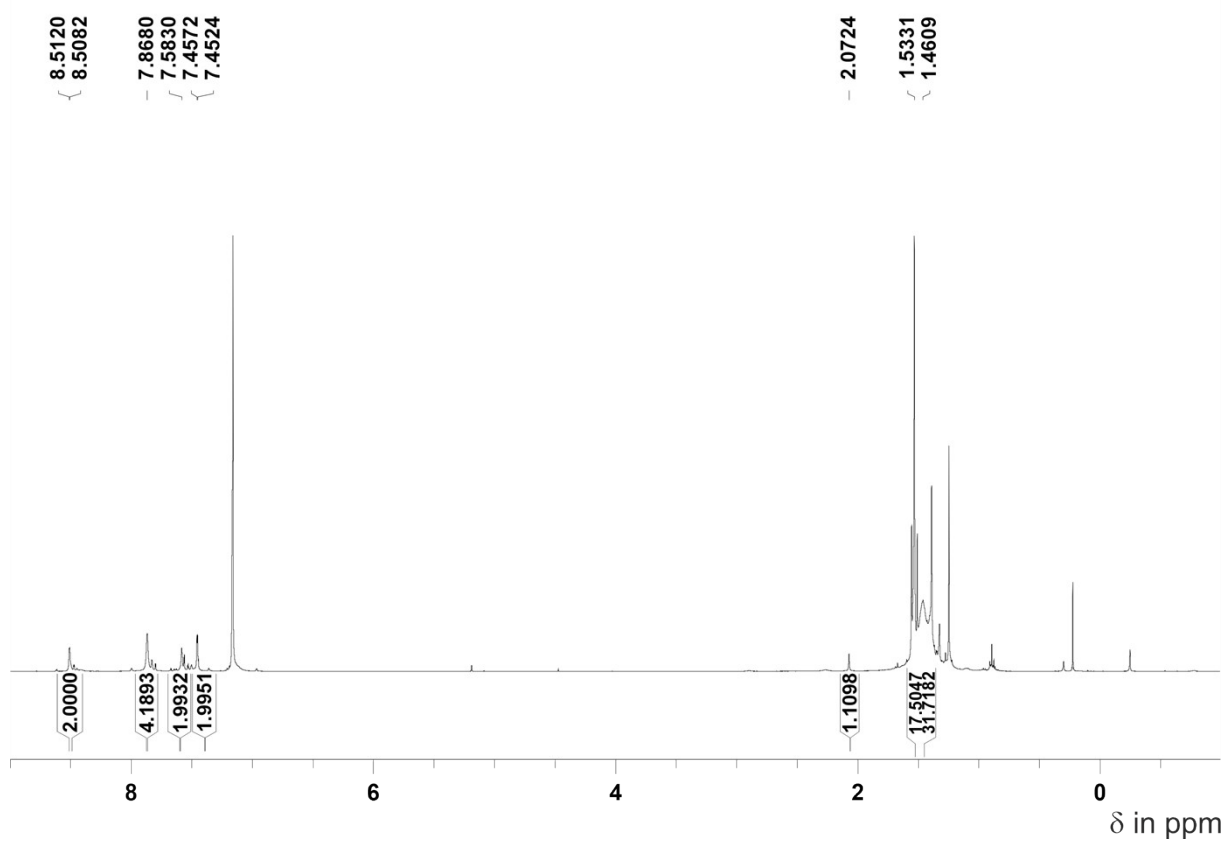

Figure S10:  $^1\text{H}$  NMR spectrum of  $3\text{Ca}\cdot\text{C}_6\text{H}_6$ .

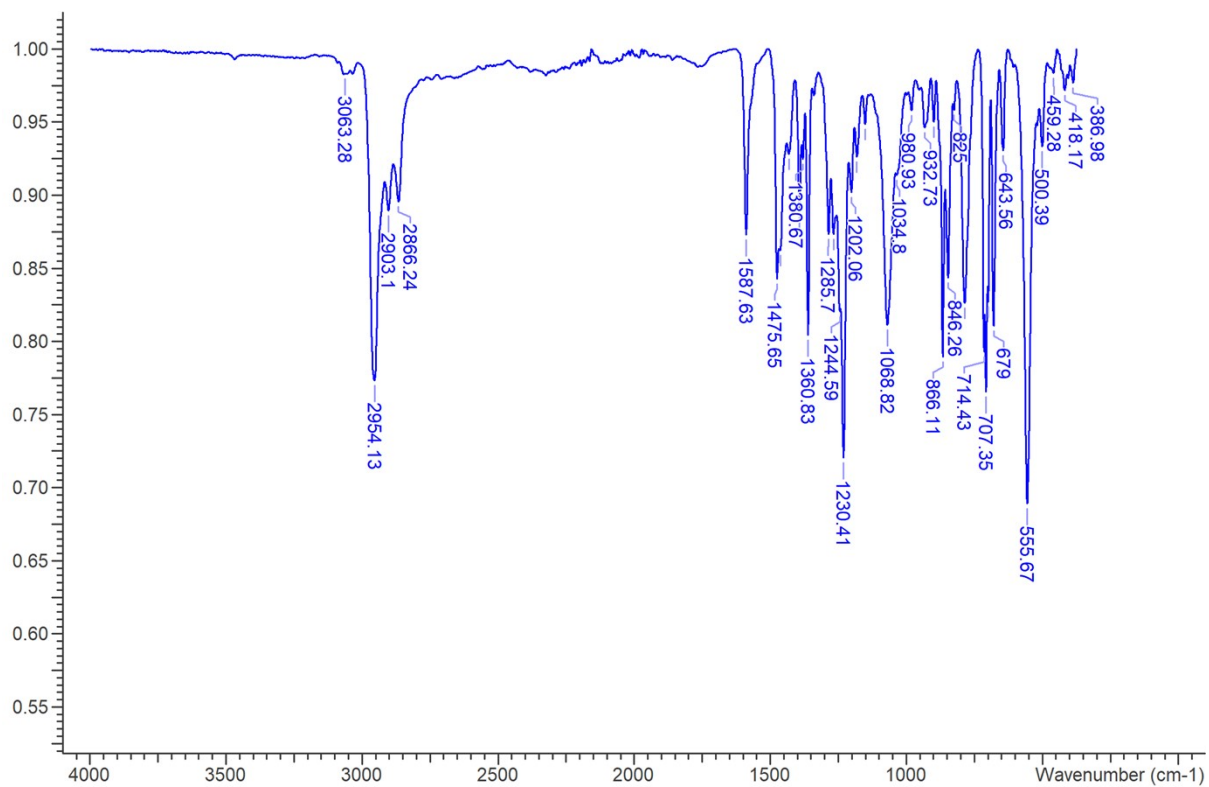

Figure S11: IR spectrum of  $3\text{Ca}\cdot\text{C}_6\text{H}_6$ .

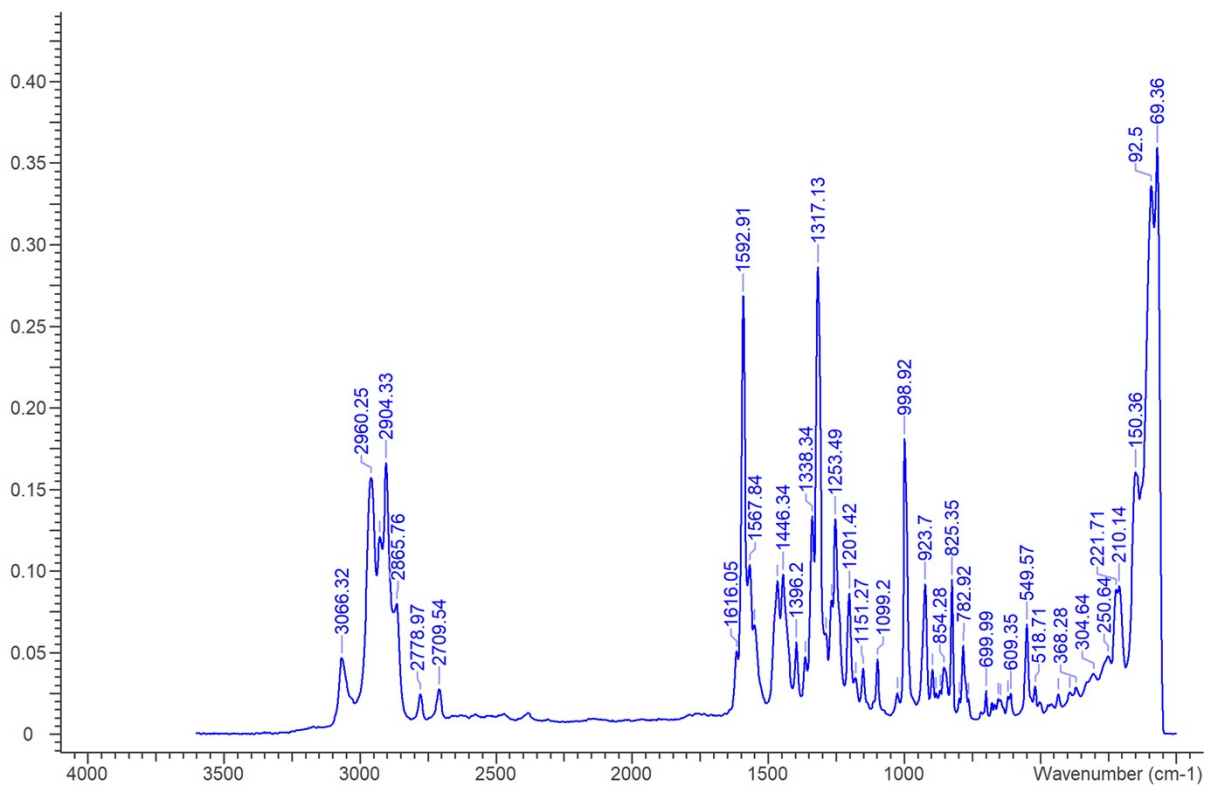

Figure S12: Raman spectrum of  $3\text{Ca}\cdot\text{C}_6\text{H}_6$ .

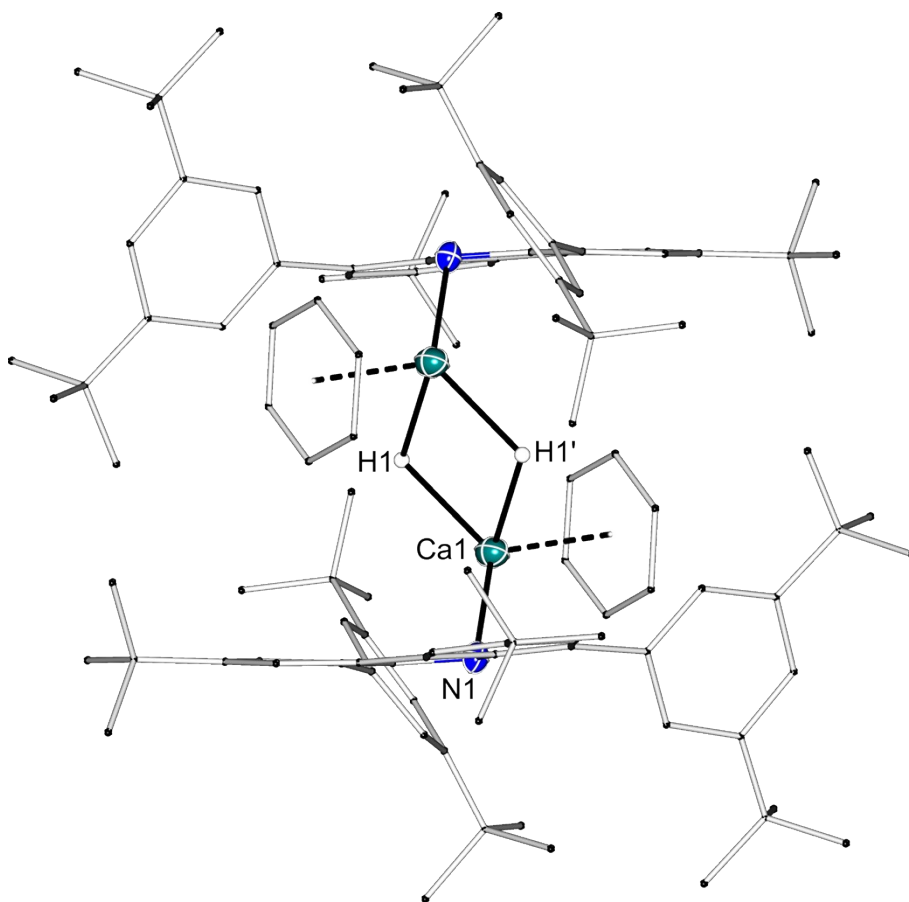

Figure S13: Molecular structure of  $3\text{Ca}\cdot\text{C}_6\text{H}_6$ .

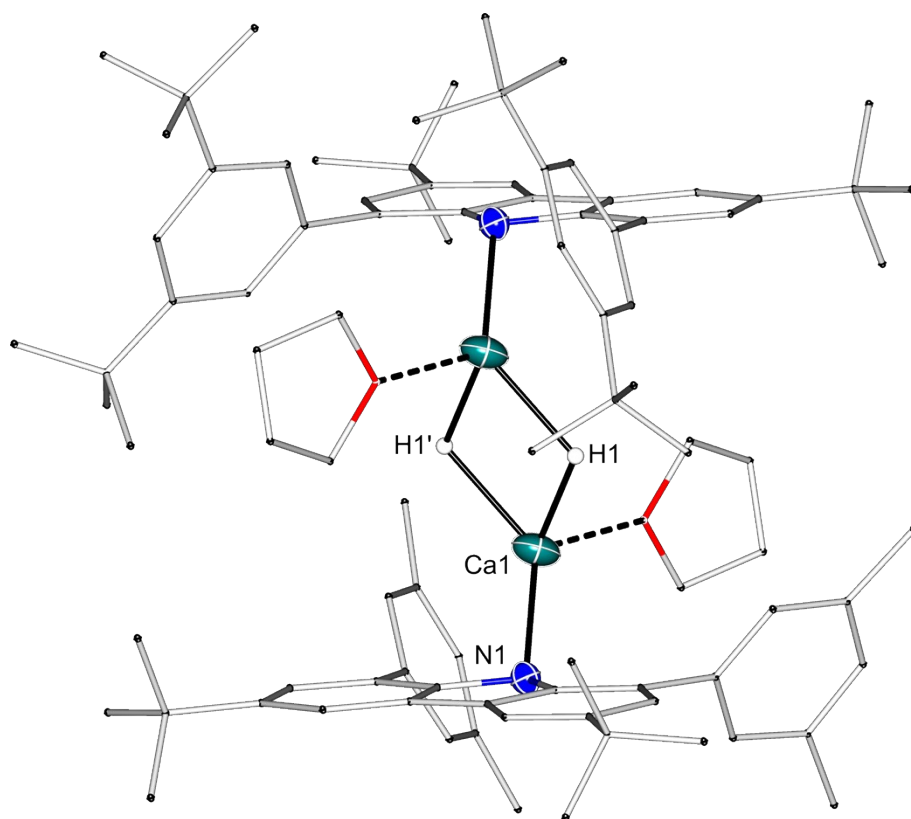

Figure S14: Molecular structure of **3Ca-THF**.

## 2.4 [(<sup>dtbp</sup>Cbz)Ca(THF)COH]<sub>2</sub> (**4Ca**)

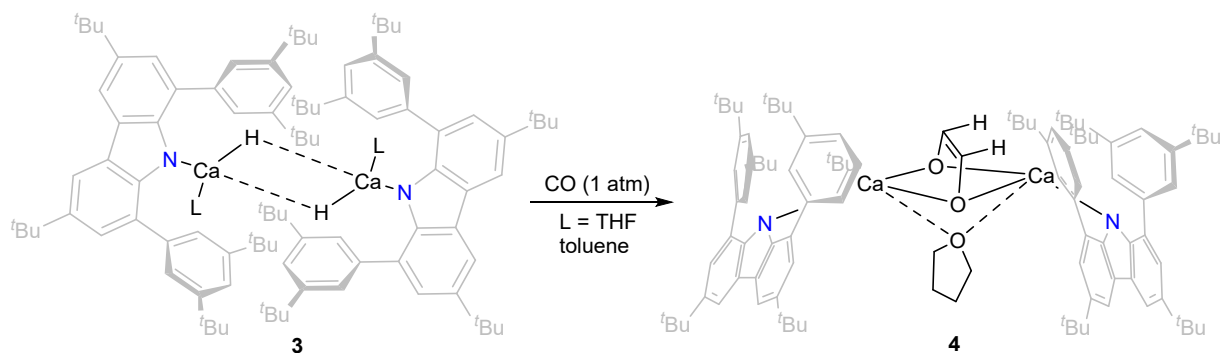

The calcium hydride **3Ca**·THF (94 mg, 0.068 mmol) was suspended in 1.1 mL C<sub>6</sub>D<sub>6</sub>, the corresponding suspension degassed and afterwards exposed to a carbon monoxide atmosphere. Within some minutes, the suspension turned bright orange and the consumption of the hydride **3Ca** is observed by a reduction of the yellow precipitate. The product crystallized from the reaction mixture. The solution phase was used for NMR characterization.

**<sup>1</sup>H NMR** (400 MHz, C<sub>6</sub>D<sub>6</sub>):  $\delta$  (ppm) = 1.35 (br, s, 36 H, Ar-C(CH<sub>3</sub>)<sub>3</sub>), 1.51 (s, 18 H, Carb-C(CH<sub>3</sub>)<sub>3</sub>), 2.39 (br, s, 1 H, OCH), 7.46 (br, s, 2 H, *p*-CH), 7.49 (d, 2 H, <sup>4</sup>J<sub>HH</sub> = 1.9 Hz, C<sup>2,7</sup>H), 7.85 (br, s, 4 H, *o*-CH), 8.45 (d, 2 H, <sup>4</sup>J<sub>HH</sub> = 1.9 Hz, C<sup>4,5</sup>H).

**<sup>13</sup>C{<sup>1</sup>H} NMR** (100.7 MHz, C<sub>6</sub>D<sub>6</sub>):  $\delta$  (ppm) = 31.95 (s, Ar-C(CH<sub>3</sub>)<sub>3</sub>), 32.59 (s, Carb-C(CH<sub>3</sub>)<sub>3</sub>), 34.75 (s, Carb-C(CH<sub>3</sub>)<sub>3</sub>), 35.24 (s, Ar-C(CH<sub>3</sub>)<sub>3</sub>), 69.46 (s, OC(H)) 115.91 (s, CH), 121.83 (s, CH), 123.82 (s, CH), 124.36 (s, CH), 127.29 (s), 132.00 (s), 138.81 (s), 142.73 (s), 147.47 (s), 152.29 (s).

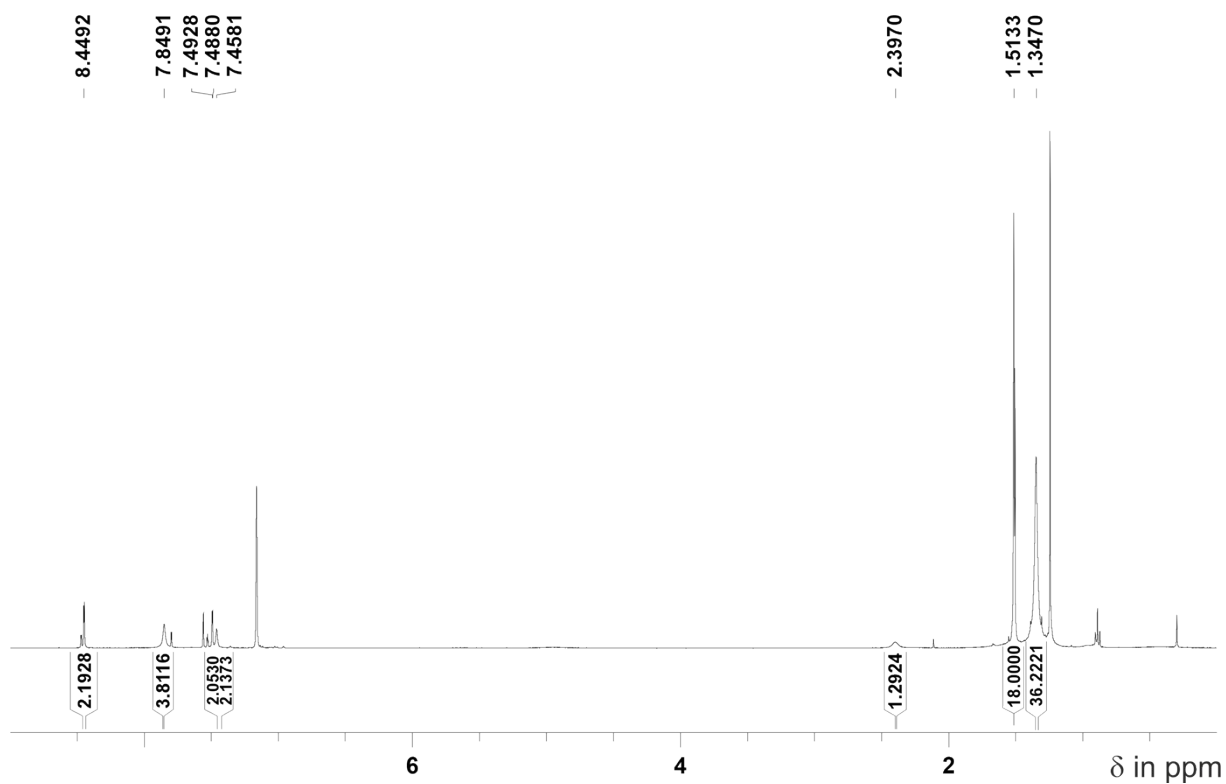

Figure S15:  $^1\text{H}$  NMR spectrum of **4Ca**, unlabeled resonances are due to Cbz-H.

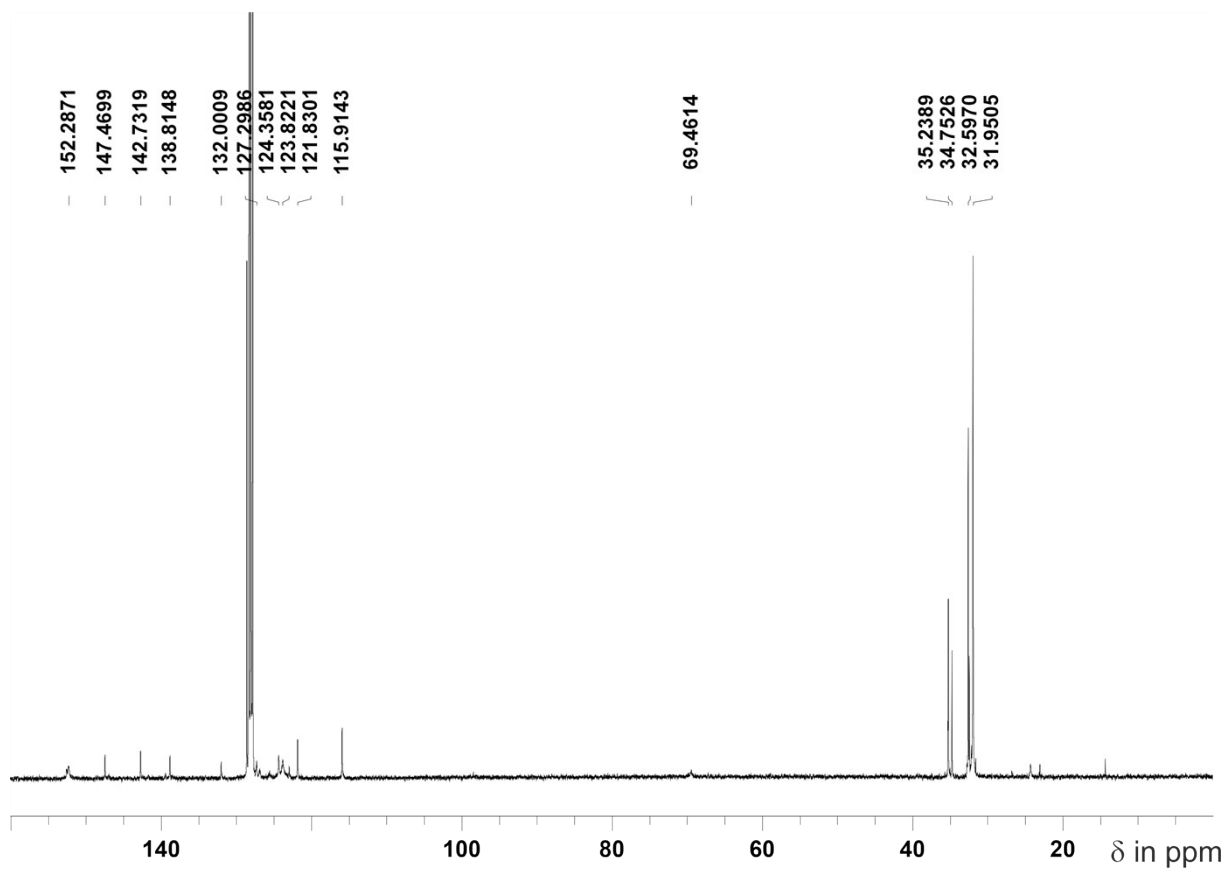

Figure S16:  $^{13}\text{C}\{^1\text{H}\}$  NMR spectrum of **4Ca**.

## 2.5 [(<sup>dtbp</sup>Cbz)Yb(SiMe<sub>3</sub>)<sub>2</sub>(THF)] (**1Yb**)

In a Schlenk flask, Yb(N{SiMe<sub>3</sub>}<sub>2</sub>)<sub>2</sub>(THF)<sub>2</sub> (800 mg, 1.25 mmol) and <sup>dtbp</sup>CbzH (846 mg, 1.29 mmol) were combined as solids. Toluene (approx. 20 ml) were added via cannula and the mixture was stirred overnight. Afterwards, volatiles were removed in vacuo, affording an orange solid. The solid was washed with a small amount of *n*-hexane (2x 1 ml) and then dried again to yield [(<sup>dtbp</sup>Cbz)YbN(SiMe<sub>3</sub>)<sub>2</sub>(THF)] (1160 mg, 1.09 mmol, 87%).

**<sup>1</sup>H NMR** (C<sub>6</sub>D<sub>6</sub>): -0.17 (s, 18 H, SiMe<sub>3</sub>), 1.06 (s, 4 H, OCH<sub>2</sub>CH<sub>2</sub>), 1.39 (s, 36 H, Ar-<sup>t</sup>Bu), 1.54 (s, 18 H, Cbz-<sup>t</sup>Bu), 2.93 (s, 4 H, OCH<sub>2</sub>), 7.59 (s, 2 H, *p*-CH), 7.69 (s, 4 H, *o*-CH), 8.08 (s, 2 H, C<sup>2,7</sup>H), 8.57 (s, 2 H, C<sup>4,5</sup>H).  
**<sup>13</sup>C NMR** (C<sub>6</sub>D<sub>6</sub>): 4.74 (s, *J*<sub>CSi</sub> = 52.7 Hz, SiC), 24.59 (s, OCH<sub>2</sub>CH<sub>2</sub>), 31.55 (s, Ar-C(CH<sub>3</sub>)<sub>3</sub>), 32.12 (s, Cbz-C(CH<sub>3</sub>)<sub>3</sub>), 34.42 (s, Cbz-C(CH<sub>3</sub>)<sub>3</sub>), 34.97 (s, Ar-C(CH<sub>3</sub>)<sub>3</sub>), 68.89 (s, OCH<sub>2</sub>CH<sub>2</sub>), 115.96 (s, CH), 122.62 (s, CH), 123.26 (s, *o*-CH), 124.43 (s, CH), 126.42 (s), 127.98 (s, C<sub>6</sub>H<sub>6</sub>), 138.99 (s), 142.87 (s), 147.07 (s), 152.43 (s). **<sup>29</sup>Si NMR** (C<sub>6</sub>D<sub>6</sub>): -16.2 (s). **<sup>171</sup>Yb NMR** (C<sub>6</sub>D<sub>6</sub>): 668.8 (s).

**IR** (ATR, cm<sup>-1</sup>): 378 (m), 403 (w), 410 (w), 422 (w), 435 (w), 455 (w), 462 (w), 475 (w), 502 (w), 520 (w), 549 (w), 584 (m), 605 (w), 619 (w), 646 (m), 666 (m), 697 (m), 719 (m), 746 (m), 763 (m), 781 (w), 811 (vs), 826 (vs), 843 (m), 856 (m), 867 (vs), 897 (w), 926 (w), 980 (w), 1026 (m), 1065 (s), 1150 (w), 1181 (w), 1202 (w), 1230 (vs), 1266 (m), 1284 (m), 1308 (w), 1337 (w), 1362 (m), 1379 (w), 1391 (m), 1433 (w), 1463 (m), 1476 (w), 1588 (w), 2869 (w), 2903 (m), 2956 (m).

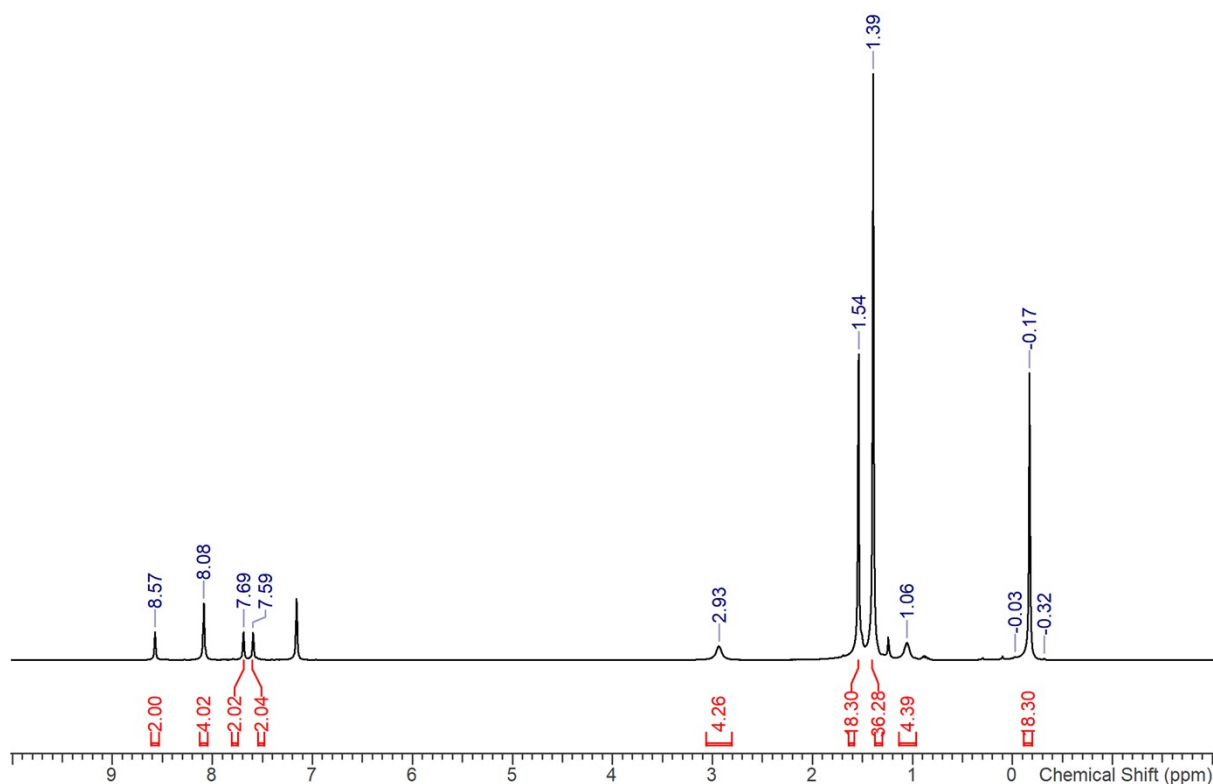

Figure S17: <sup>1</sup>H NMR spectrum of **1Yb**.



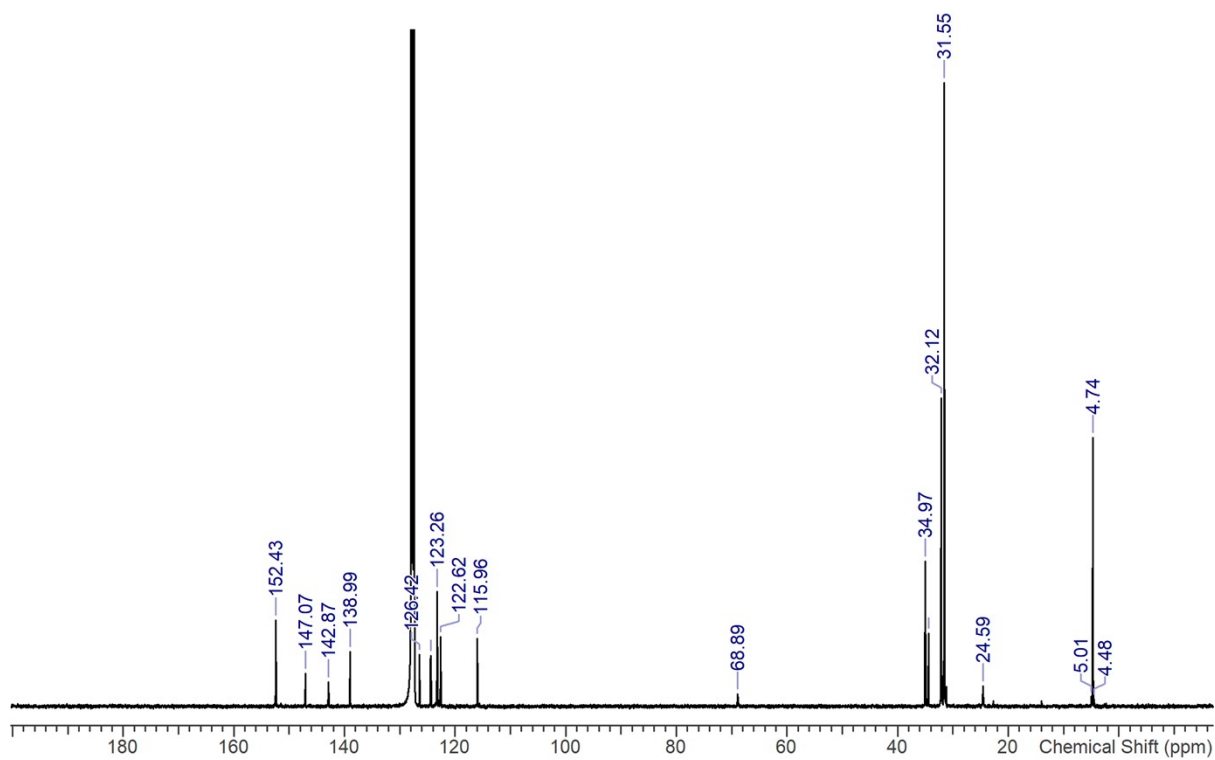

Figure S18:  $^{13}\text{C}\{^1\text{H}\}$  NMR spectrum of **1Yb**.

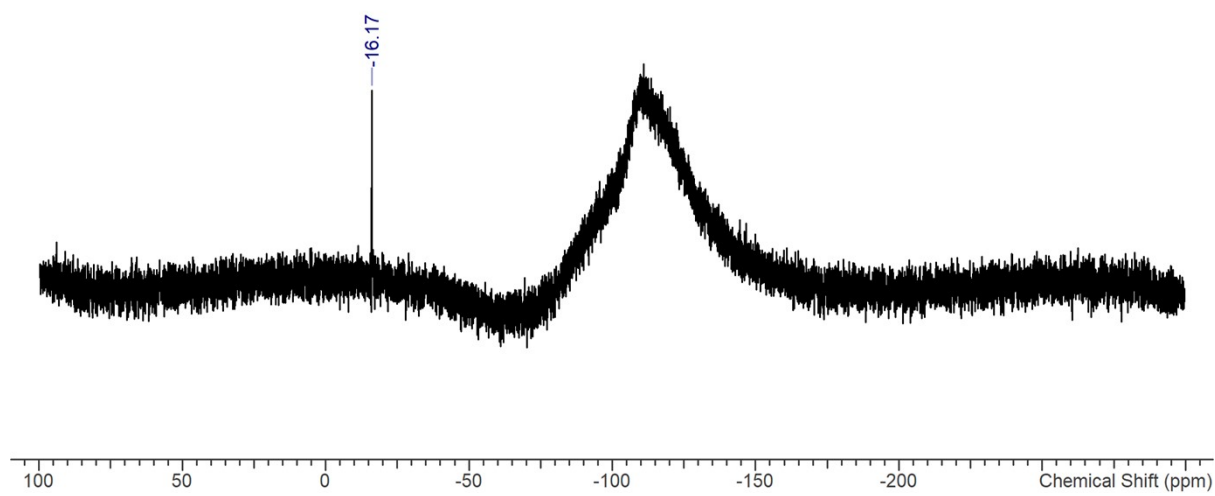

Figure S19:  $^{29}\text{Si}\{^1\text{H}\}$  NMR spectrum of **1Yb**.

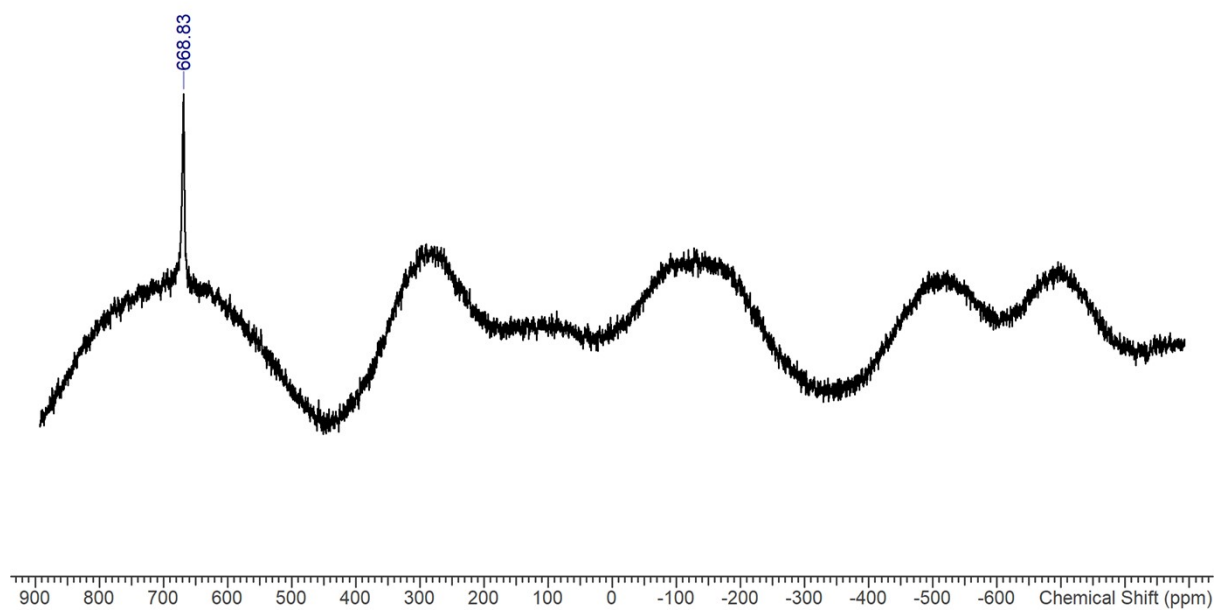

Figure S20:  $^{171}\text{Yb}$  NMR spectrum of **1Yb**.

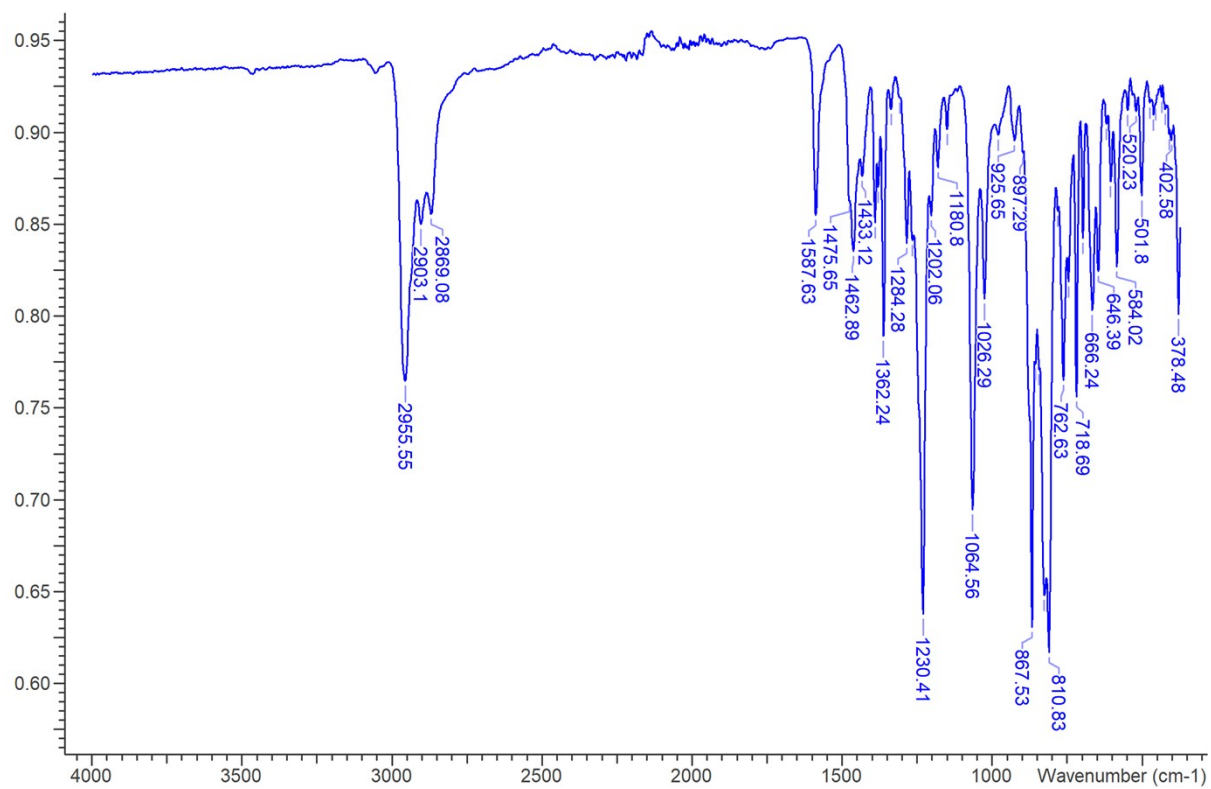

Figure S21: IR spectrum of **1Yb**.

## 2.6 $[(\text{dtbpCbz})\text{Yb}(\text{C}_6\text{H}_6)\text{H}] (\mathbf{3Yb} \cdot \text{C}_6\text{H}_6)$

To 250 mg (0.236 mmol)  $[(\text{dtbpCbz})\text{Yb}(\text{SiMe}_3)_2(\text{THF})]$ , 5 ml of  $\text{Et}_2\text{O}$  were added. After dissolution, volatiles were evaporated in vacuo, then the sample was heated to 80 °C for 1 hour under dynamic vacuum. The process was repeated a second time. Then, the residue was dissolved in 3 ml of benzene and 50 mg of phenyl silane were added via microsyringe which immediately darkened the reaction mixture. The solution was left undisturbed overnight, depositing dark orange crystals of  $[(\text{dtbpCbz})\text{YbH}(\text{C}_6\text{H}_6)]_2$ . The supernatant was removed via syringe and the crystals were washed with *n*-hexane (2x 1 ml). The crystals were then dried in vacuo for 30 minutes, affording  $[(\text{dtbpCbz})\text{YbH}(\text{C}_6\text{H}_6)]_2$  (46 mg, 0.025 mmol, 21%).

$[(\text{dtbpCbz})\text{YbH}(\text{C}_6\text{H}_6)]_2$  was obtained when  $[(\text{dtbpCbz})\text{Yb}(\text{SiMe}_3)_2(\text{THF})]$  with phenyl silane in *n*-hexane solution according to the above protocol.

NMR data could not be obtained due to insolubility of the compound.

IR (ATR,  $\text{cm}^{-1}$ ): 388 (w), 398 (w), 411 (w), 424 (w), 438 (w), 462 (w), 473 (w), 500 (m), **550 (s)**, 618 (w), 642 (m), 676 (w), 699 (s), 707 (vs), 714 (s), 774 (m), **797 (m)**, 824 (w), 846 (s), 866 (s), 900 (w), 934 (w), 979 (w), 1028 (w), **1073 (s)**, 1151 (w), 1182 (w), 1202 (m), 1232 (vs), 1245 (s), 1267 (m), 1286 (m), 1340 (w), 1361 (s), 1381 (m), 1392 (m), 1433 (w), 1461 (m), 1473 (m), 1589 (m), 2866 (m), 2903 (m), 2954 (s), 3059 (vw).

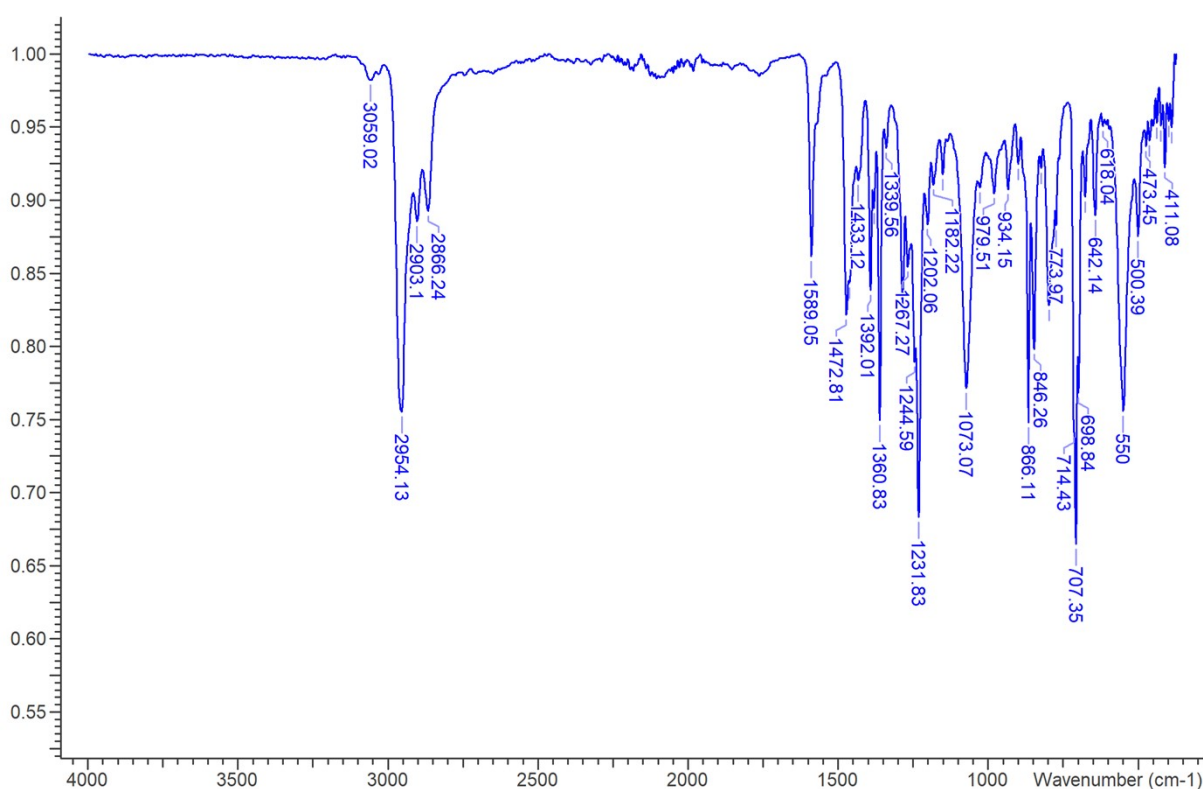

Figure S22: IR spectrum of  $\mathbf{3Yb} \cdot \text{C}_6\text{H}_6$ .

## 2.7 $[(\text{dtbpCbz})_2\text{Yb}_2\text{L}_2(\text{H}_2\text{C}_2\text{O}_2)]$ (**4Yb**)

In a Young tube, 40 mg (22  $\mu\text{mol}$ ) of  $[(\text{dtbpCbz})\text{Yb}(\text{L})_2\text{H}]_2$  were suspended in 2 ml of benzene. The suspension was degassed and then exposed to 1 bar of CO at ambient temperature. The solution phase darkened rapidly. After standing overnight, a small crop of new crystals formed that could be identified as the ethenediolate complex  $[(\text{dtbpCbz})_2\text{Yb}_2\text{L}_2(\text{H}_2\text{C}_2\text{O}_2)]$ . The supernatant was evaporated solid was washed with 0.5 ml of *n*-hexane, affording  $[(\text{dtbpCbz})_2\text{Yb}_2\text{L}_2(\text{H}_2\text{C}_2\text{O}_2)]$  as orange solid (8 mg, 4  $\mu\text{mol}$ , 19%). Redissolution in  $\text{C}_6\text{D}_6$  did not allow NMR characterisation, as paramagnetic species formed.

**IR** (ATR,  $\text{cm}^{-1}$ ): 386 (m), 394 (m), 404 (m), 414(m), 424 (m), 432 (m), 444 (m), 452 (m), 462 (m), 472 (m), 482 (w), 499 (m), 512 (w), 519 (m), 645 (m), 678 (m), 699 (s), 717 (s), 761 (m), 774 (m), 822 (s), 849 (s), 865 (s), 899 (m), 930 (s), 951 (m), 981 (m), 998 (w), 1016 (m), 1028 (m), 1070 (m), 1114 (m), 1134 (m), 1151 (m), 1184 (m), 1202 (m), 1208 (m), 1233 (s), 1245 (s), 1270 (s), 1284 (s), 1361 (s), 1392 (m), 1429 (m), 1461 (m), 1474 (m), 1589 (m), 2866 (m), 2903 (m), 2954 (s).

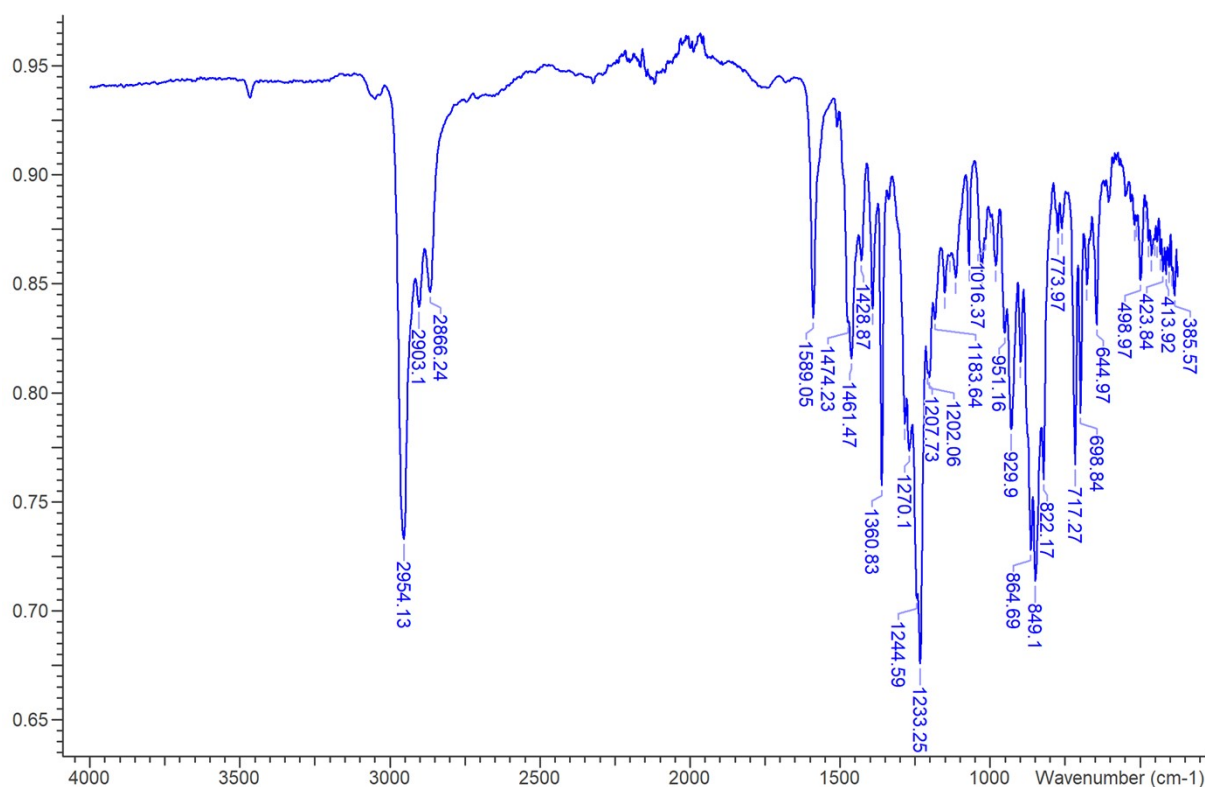

Figure S23: IR spectrum of **4Yb**.

## 2.8 [(dtbpCbz)CaD] (3Ca-D·C<sub>6</sub>H<sub>6</sub>)

The amide **2Ca** (138 mg, 0.161 mmol) was dissolved in 1.0 mL of benzene. To that solution, phenylsilane-*d*<sub>3</sub> (40 μL, 0.316 mmol, 1.96 eq.) was added via microsyringe. The mixture was shaken and then left undisturbed overnight. Afterwards, very small crystals were observed. The solution was concentrated to half of its volume and left undisturbed for at least five hours. Crystalline material formed. The supernatant was removed, the crystals were washed multiple times with *n*-hexane and briefly dried. The characterisation data were obtained from the crystalline material.

**IR** (ATR)  $\tilde{\nu}$  (cm<sup>-1</sup>) = 388 (s), **404 (s)**, 456 (vw), 499 (w), 519 (w), 547 (w), 556 (w), **571 (w)**, 602 (w), 617 (w), 646 (m), 676 (m), 699 (m), 716 (m), **774 (m)**, 825 (w), 848 (m), 865 (s), 899 (w), 921 (w), 931 (w), 980 (vw), 1026 (w), 1072 (vw), 1150 (w), 1184 (w), 1201 (w), 1232 (vs), 1245 (s), 1269 (m), 1284 (m), 1338 (w), 1361 (s), 1382 (w), 1392 (m), 1430 (w), 1466 (m), 1569 (w), 1589 (m), 2865 (m), 2902 (m), 2954 (s).

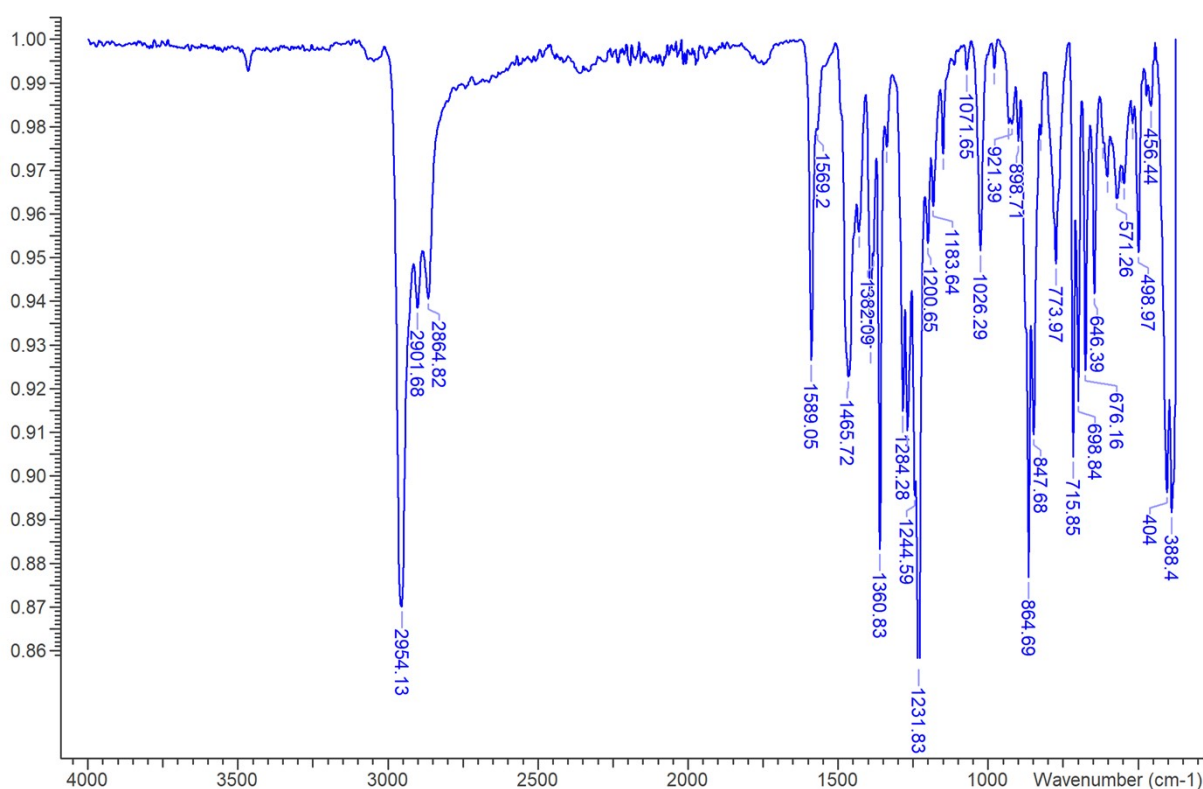

Figure S24: IR spectrum of **3Ca-D·C<sub>6</sub>H<sub>6</sub>**.

### 3 Crystallographic Details

Table S1: Crystallographic details for **1Ca** and **2Ca**.

|                                             | RCaN(SiMe <sub>3</sub> ) <sub>2</sub> (THF)<br><b>(1Ca)</b>        | RCaN(SiMe <sub>3</sub> ) <sub>2</sub> (THF)<br><b>(1Ca hexane solvate)</b> | RCaN(SiMe <sub>3</sub> ) <sub>2</sub><br><b>(2Ca)</b>             |
|---------------------------------------------|--------------------------------------------------------------------|----------------------------------------------------------------------------|-------------------------------------------------------------------|
| CCDC #                                      | 2145430                                                            | 2145431                                                                    | 2145432                                                           |
| <i>Empirical formula</i>                    | C <sub>58</sub> H <sub>90</sub> N <sub>2</sub> OSi <sub>2</sub> Ca | C <sub>61</sub> H <sub>97</sub> N <sub>2</sub> OSi <sub>2</sub> Ca         | C <sub>54</sub> H <sub>82</sub> N <sub>2</sub> Si <sub>2</sub> Ca |
| <i>FW [g mol<sup>-1</sup>]</i>              | 927.57                                                             | 970.66                                                                     | 855.47                                                            |
| <i>Wavelength [Å]</i>                       | 0.71073                                                            | 0.71073                                                                    | 0.71073                                                           |
| <i>Temperature [K]</i>                      | 200(2)                                                             | 200(2)                                                                     | 200(2)                                                            |
| <i>Crystal system</i>                       | monoclinic                                                         | triclinic                                                                  | monoclinic                                                        |
| <i>Space group</i>                          | <i>P2<sub>1</sub>/n</i>                                            | <i>P-1</i>                                                                 | <i>P2<sub>1</sub>/n</i>                                           |
| <i>a [Å]</i>                                | 16.1404(4)                                                         | 11.859(3)                                                                  | 16.4998(8)                                                        |
| <i>b [Å]</i>                                | 18.4014(3)                                                         | 14.163(2)                                                                  | 16.2635(10)                                                       |
| <i>c [Å]</i>                                | 19.6125(5)                                                         | 18.825(3)                                                                  | 20.1945(10)                                                       |
| <i>α [°]</i>                                | 90                                                                 | 92.034(11)                                                                 | 90                                                                |
| <i>β [°]</i>                                | 97.612(2)                                                          | 106.542(14)                                                                | 91.354(4)                                                         |
| <i>γ [°]</i>                                | 90                                                                 | 92.672(15)                                                                 | 90                                                                |
| <i>V [Å<sup>3</sup>]</i>                    | 5773.7(2)                                                          | 3023.7(9)                                                                  | 5417.6(5)                                                         |
| <i>Z</i>                                    | 4                                                                  | 2                                                                          | 4                                                                 |
| <i>ρ<sub>calc</sub> (g·cm<sup>-3</sup>)</i> | 1.067                                                              | 1.066                                                                      | 1.049                                                             |
| <i>μ</i>                                    | 0.187                                                              | 0.181                                                                      | 0.194                                                             |
| <i>F(000)</i>                               | 2032                                                               | 1066                                                                       | 1872                                                              |
| <i>reflections collected</i>                | 51714                                                              | 37684                                                                      | 36337                                                             |
| <i>independent reflections</i>              | 15576                                                              | 37684                                                                      | 14389                                                             |
| <i>reflectionsGT (I &gt; 2σ(I))</i>         | 11636                                                              | 27827                                                                      | 10093                                                             |
| <i>R<sub>int</sub></i>                      | 0.0238                                                             | 0.0228                                                                     | 0.0312                                                            |
| <i>parameters</i>                           | 737                                                                | 769                                                                        | 793                                                               |
| <i>restraints</i>                           | 690                                                                | 762                                                                        | 1321                                                              |
| <i>Goof</i>                                 | 1.025                                                              | 1.026                                                                      | 1.035                                                             |
| <i>R1</i>                                   | 0.0459                                                             | 0.0487                                                                     | 0.0497                                                            |
| <i>R1 (all)</i>                             | 0.0675                                                             | 0.0719                                                                     | 0.0756                                                            |
| <i>wR2</i>                                  | 0.1162                                                             | 0.1275                                                                     | 0.1292                                                            |
| <i>wR2 (all)</i>                            | 0.1311                                                             | 0.1436                                                                     | 0.1465                                                            |
| <i>weight factors</i>                       | 0.0629                                                             | 0.0692                                                                     | 0.0705                                                            |
|                                             | 1.7805                                                             | 0.8587                                                                     | 1.2183                                                            |

Table S2: Crystallographic details for **2Ca** (dimer), and **3Ca**.

|                                             | RCaH·THF<br>( <b>3Ca</b> ·THF)       | RCaH·C <sub>6</sub> H <sub>6</sub><br>( <b>3Ca</b> ·C <sub>6</sub> H <sub>6</sub> ) | [RCa(OCH)] <sub>2</sub> ·THF<br>( <b>4Ca</b> )                                  |
|---------------------------------------------|--------------------------------------|-------------------------------------------------------------------------------------|---------------------------------------------------------------------------------|
| <i>CCDC #</i>                               | 2145437                              | 2145438                                                                             | 2372502                                                                         |
| <i>Empirical formula</i>                    | C <sub>52</sub> H <sub>73</sub> NOCa | C <sub>66</sub> H <sub>83</sub> NCa                                                 | C <sub>102</sub> H <sub>138</sub> Ca <sub>2</sub> N <sub>2</sub> O <sub>3</sub> |
| <i>FW [g mol<sup>-1</sup>]</i>              | 768.19                               | 930.41                                                                              | 1520.30                                                                         |
| <i>Wavelength [Å]</i>                       | 0.71073                              | 1.34143                                                                             | 1.34143                                                                         |
| <i>Temperature [K]</i>                      | 200(2)                               | 150(2)                                                                              | 180(2)                                                                          |
| <i>Crystal system</i>                       | triclinic                            | triclinic                                                                           | monoclinic                                                                      |
| <i>Space group</i>                          | <i>P</i> -1                          | <i>P</i> -1                                                                         | <i>C</i> 2/ <i>c</i>                                                            |
| <i>a [Å]</i>                                | 13.1101(5)                           | 13.7368(8)                                                                          | 17.5438(5)                                                                      |
| <i>b [Å]</i>                                | 13.6268(5)                           | 16.0770(8)                                                                          | 21.5053(4)                                                                      |
| <i>c [Å]</i>                                | 14.1886(6)                           | 16.7076(11)                                                                         | 26.0497(7)                                                                      |
| <i>α [°]</i>                                | 74.213(3)                            | 103.641(4)                                                                          | 90                                                                              |
| <i>β [°]</i>                                | 86.447(3)                            | 110.348(5)                                                                          | 106.954(2)                                                                      |
| <i>γ [°]</i>                                | 76.820(3)                            | 113.208(4)                                                                          | 90                                                                              |
| <i>V [Å<sup>3</sup>]</i>                    | 2374.91(17)                          | 2866.6(3)                                                                           | 9401.0(4)                                                                       |
| <i>Z</i>                                    | 2                                    | 2                                                                                   | 4                                                                               |
| <i>ρ<sub>calc</sub> (g·cm<sup>-3</sup>)</i> | 1.074                                | 1.078                                                                               | 1.074                                                                           |
| <i>μ</i>                                    | 0.167                                | 0.800                                                                               | 0.926                                                                           |
| <i>F(000)</i>                               | 840                                  | 1012                                                                                | 3312                                                                            |
| <i>reflections collected</i>                | 21167                                | 35762                                                                               | 31824                                                                           |
| <i>independent reflections</i>              | 10846                                | 13326                                                                               | 10346                                                                           |
| <i>reflectionsGT (I &gt; 2σ(I))</i>         | 7775                                 | 10810                                                                               | 7308                                                                            |
| <i>R<sub>int</sub></i>                      | 0.0243                               | 0.0160                                                                              | 0.0249                                                                          |
| <i>parameters</i>                           | 692                                  | 813                                                                                 | 578                                                                             |
| <i>restraints</i>                           | 985                                  | 1381                                                                                | 330                                                                             |
| <i>GooF</i>                                 | 1.063                                | 1.098                                                                               | 1.111                                                                           |
| <i>R1</i>                                   | 0.0554                               | 0.0508                                                                              | 0.0478                                                                          |
| <i>R1 (all)</i>                             | 0.0864                               | 0.0603                                                                              | 0.0688                                                                          |
| <i>wR2</i>                                  | 0.1260                               | 0.1521                                                                              | 0.1338                                                                          |
| <i>wR2 (all)</i>                            | 0.1450                               | 0.1578                                                                              | 0.1411                                                                          |
| <i>weight factors</i>                       | 0.0538                               | 0.0971                                                                              | 0.0788                                                                          |
|                                             | 1.4404                               | 0.4752                                                                              | 0.6480                                                                          |

Table S3: Crystallographic details for **1Yb**, **2Yb** and **3Yb**.

|                                             | RYbNT <sub>2</sub> ·THF<br><b>(1Yb)</b>                            | RYbH·THF<br><b>(3Yb·THF)</b>         | RYbH·C <sub>6</sub> H <sub>6</sub><br><b>(3Yb·C<sub>6</sub>H<sub>6</sub>)</b> | [RYb(OCH)] <sub>2</sub><br><b>(4Yb)</b>                                                  |
|---------------------------------------------|--------------------------------------------------------------------|--------------------------------------|-------------------------------------------------------------------------------|------------------------------------------------------------------------------------------|
| <i>CCDC #</i>                               | 2372499                                                            | 2372500                              | 2372501                                                                       | 2372503                                                                                  |
| <i>Empirical formula</i>                    | C <sub>61</sub> H <sub>97</sub> N <sub>2</sub> OSi <sub>2</sub> Yb | C <sub>52</sub> H <sub>73</sub> NOYb | C <sub>66</sub> H <sub>83</sub> NYb                                           | C <sub>113.33</sub> H <sub>150.67</sub> N <sub>2</sub> O <sub>3.33</sub> Yb <sub>2</sub> |
| <i>FW [g mol<sup>-1</sup>]</i>              | 1103.62                                                            | 901.15                               | 1063.37                                                                       | 1940.43                                                                                  |
| <i>Wavelength [Å]</i>                       | 1.34143                                                            | 0.71073                              | 0.71073                                                                       | 0.71073                                                                                  |
| <i>Temperature [K]</i>                      | 150(2)                                                             | 100(2)                               | 100(2)                                                                        | 100(2)                                                                                   |
| <i>Crystal system</i>                       | triclinic                                                          | triclinic                            | triclinic                                                                     | triclinic                                                                                |
| <i>Space group</i>                          | <i>P</i> -1                                                        | <i>P</i> -1                          | <i>P</i> -1                                                                   | <i>P</i> -1                                                                              |
| <i>a [Å]</i>                                | 11.7801(6)                                                         | 12.930(2)                            | 13.6301(5)                                                                    | 14.3009(8)                                                                               |
| <i>b [Å]</i>                                | 14.1233(8)                                                         | 13.419(2)                            | 16.0796(5)                                                                    | 21.2924(11)                                                                              |
| <i>c [Å]</i>                                | 18.7536(10)                                                        | 13.9153(19)                          | 16.2110(5)                                                                    | 27.1108(13)                                                                              |
| <i>α [°]</i>                                | 92.001(4)                                                          | 74.266(12)                           | 114.438(2)                                                                    | 66.923(4)                                                                                |
| <i>β [°]</i>                                | 106.563(4)                                                         | 86.131(12)                           | 95.447(3)                                                                     | 84.961(4)                                                                                |
| <i>γ [°]</i>                                | 92.221(4)                                                          | 76.624(13)                           | 113.394(3)                                                                    | 85.933(4)                                                                                |
| <i>V [Å<sup>3</sup>]</i>                    | 2985.0(3)                                                          | 2260.9(6)                            | 2822.27(18)                                                                   | 7559.3(7)                                                                                |
| <i>Z</i>                                    | 2                                                                  | 2                                    | 2                                                                             | 3                                                                                        |
| <i>ρ<sub>calc</sub> (g·cm<sup>-3</sup>)</i> | 1.228                                                              | 1.324                                | 1.251                                                                         | 1.279                                                                                    |
| <i>μ</i>                                    | 5.583                                                              | 2.105                                | 1.696                                                                         | 1.895                                                                                    |
| <i>F(000)</i>                               | 1166                                                               | 940                                  | 1112                                                                          | 3034                                                                                     |
| <i>reflections collected</i>                | 34055                                                              | 20802                                | 29707                                                                         | 101366                                                                                   |
| <i>independent reflections</i>              | 12109                                                              | 8751                                 | 12569                                                                         | 29716                                                                                    |
| <i>reflectionsGT (I &gt; 2σ(I))</i>         | 6793                                                               | 6221                                 | 11112                                                                         | 13919                                                                                    |
| <i>R<sub>int</sub></i>                      | 0.0928                                                             | 0.0792                               | 0.0242                                                                        | 0.1144                                                                                   |
| <i>parameters</i>                           | 648                                                                | 548                                  | 813                                                                           | 2239                                                                                     |
| <i>restraints</i>                           | 100                                                                | 162                                  | 1381                                                                          | 2783                                                                                     |
| <i>GooF</i>                                 | 0.831                                                              | 1.078                                | 1.098                                                                         | 1.000                                                                                    |
| <i>R1</i>                                   | 0.0502                                                             | 0.0623                               | 0.0302                                                                        | 0.0819                                                                                   |
| <i>R1 (all)</i>                             | 0.1011                                                             | 0.1035                               | 0.0376                                                                        | 0.1873                                                                                   |
| <i>wR2</i>                                  | 0.0985                                                             | 0.1334                               | 0.0744                                                                        | 0.1881                                                                                   |
| <i>wR2 (all)</i>                            | 0.1095                                                             | 0.1695                               | 0.0768                                                                        | 0.2462                                                                                   |
| <i>weight factors</i>                       | 0.0488                                                             | 0.0536                               | 0.0477                                                                        | 0.1263                                                                                   |
|                                             | 0                                                                  | 22.4962                              | 1.8778                                                                        | 0                                                                                        |



## 4 Computational Details

All computations were performed using Gaussian16<sup>[10]</sup> utilizing the PBE1PBE level of theory, Def2SVP basis sets and empirical dispersion correction (GD3). Yb was included with a large ECP (ECP60MDF) and corresponding basis set.<sup>[11]</sup> No solvent corrections were applied. All optimized molecular structures were checked to be minima on the energy hypersurface and possess no imaginary vibrational frequencies.

### 4.1 Vibrational modes in $3\text{Ca}\cdot\text{C}_6\text{H}_6$ and $3\text{Yb}\cdot\text{C}_6\text{H}_6$

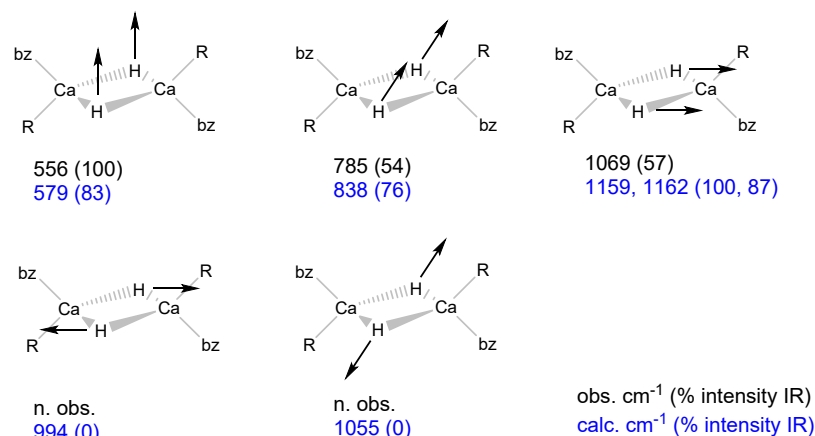

Figure S25: Observed vs. (unscaled) calculated vibrational data for the hydride-involving vibrational modes for  $3\text{Ca}\cdot\text{C}_6\text{H}_6$ .

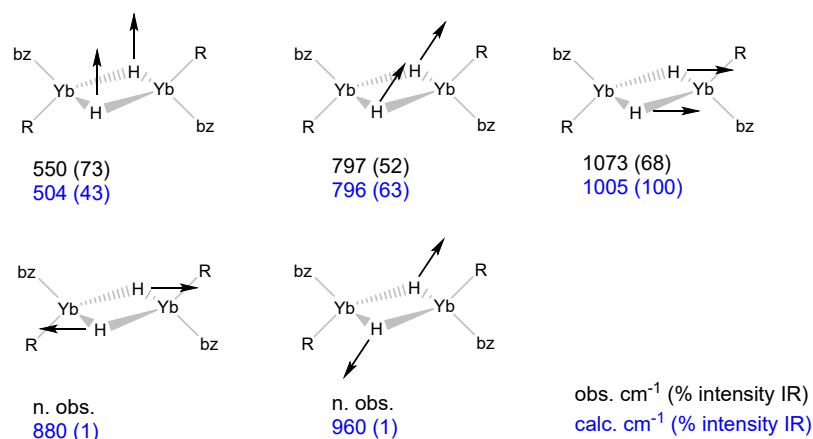

Figure S26: Observed vs. (unscaled) calculated vibrational data for the hydride-involving vibrational modes for  $3\text{Yb}\cdot\text{C}_6\text{H}_6$ .

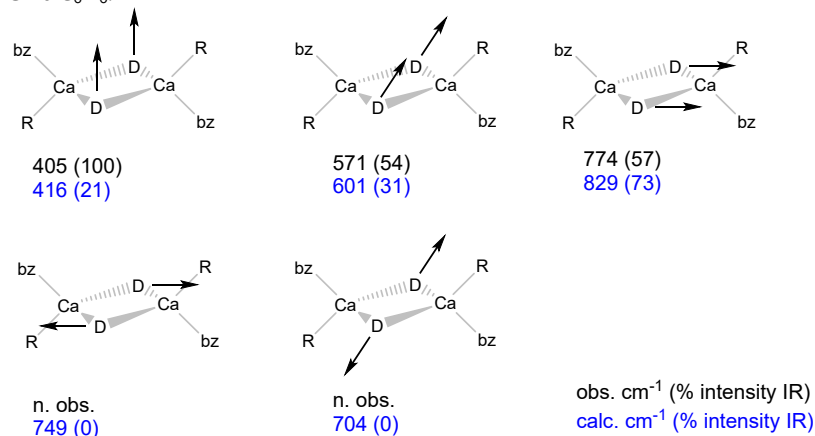

Figure S27: Observed vs. (unscaled) calculated vibrational data for the hydride-involving vibrational modes for **3Ca-D**-C<sub>6</sub>H<sub>6</sub>.

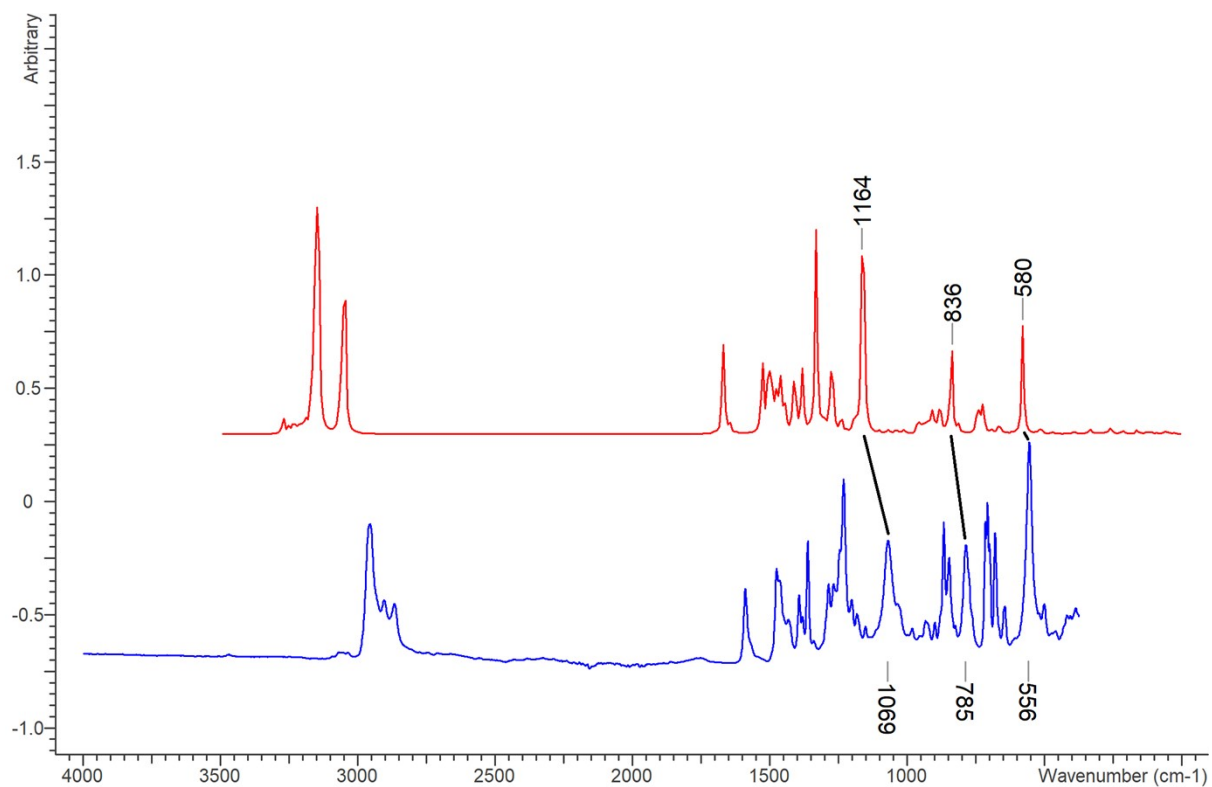

Figure S28: Unscaled computed (red) and observed (blue) IR spectrum **3Ca-bz**. Hydride-involving bands are marked.

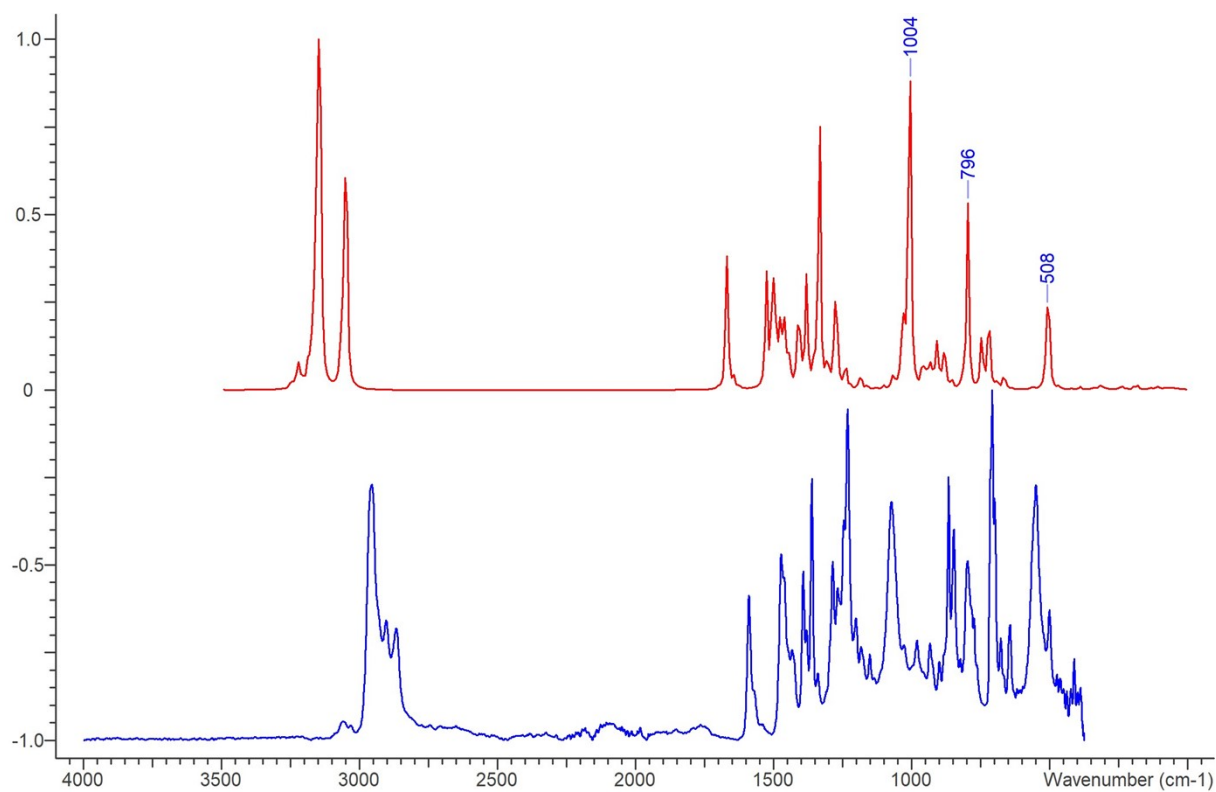

Figure S29: Unscaled computed (red) and observed (blue) IR spectrum **3Yb-bz**. Hydride-involving bands are marked.

## 4.2 Optimised Structures

### 4.2.1 (dtbpCbz)CaN(SiMe<sub>3</sub>)<sub>2</sub>

|     |             |             |             |
|-----|-------------|-------------|-------------|
| 0 1 |             |             |             |
| Ca  | 0.24884900  | -0.91894500 | 0.08150300  |
| Si  | -0.15506300 | -3.39253300 | -1.86256800 |
| Si  | -0.52017100 | -0.69214400 | -3.32455800 |
| C   | -1.09331100 | 1.00286700  | -2.72308500 |
| H   | -1.34385700 | 1.65850100  | -3.57257400 |
| H   | -0.31461600 | 1.51733300  | -2.13466300 |
| H   | -1.98694200 | 0.92867600  | -2.08265400 |
| C   | 0.97090500  | -0.39923500 | -4.45229000 |
| H   | 1.37820500  | -1.34622700 | -4.84147000 |
| H   | 1.77798500  | 0.11646900  | -3.90829400 |
| H   | 0.69251000  | 0.22913900  | -5.31430100 |
| C   | -1.88071200 | -1.42989800 | -4.41399300 |
| H   | -1.58464700 | -2.41191700 | -4.81880600 |
| H   | -2.09614300 | -0.77017500 | -5.27025500 |
| H   | -2.81430200 | -1.56519600 | -3.84783500 |
| N   | 0.08259000  | 1.29325100  | 0.67506500  |
| N   | -0.13238200 | -1.68492700 | -1.96217100 |
| C   | -1.03095400 | 2.09740900  | 0.65318600  |
| C   | -2.38542900 | 1.70984500  | 0.68820000  |
| C   | -3.35298100 | 2.71354500  | 0.56604800  |
| H   | -4.39780700 | 2.40392200  | 0.61292100  |
| C   | -3.04228100 | 4.07798100  | 0.41789900  |
| C   | -1.69254400 | 4.44220100  | 0.37697900  |
| H   | -1.40619900 | 5.48952100  | 0.24608100  |
| C   | -0.69538400 | 3.47332100  | 0.48457500  |
| C   | 0.74275800  | 3.50510300  | 0.39568600  |
| C   | 1.68875600  | 4.51167200  | 0.17176800  |
| H   | 1.34886500  | 5.54421400  | 0.07735000  |
| C   | 3.04183200  | 4.19236600  | 0.05298100  |
| C   | 3.41876300  | 2.83440600  | 0.17034800  |
| H   | 4.47389200  | 2.56063300  | 0.08256500  |
| C   | 2.50781600  | 1.81023400  | 0.41335700  |
| C   | 1.14590100  | 2.14951100  | 0.52110900  |
| C   | -2.78935700 | 0.29403800  | 0.81325000  |
| C   | -2.18959900 | -0.55376800 | 1.76857800  |
| H   | -1.43838100 | -0.11282800 | 2.42869200  |
| C   | -2.64021100 | -1.86647600 | 1.96412300  |
| C   | -3.68057700 | -2.33688000 | 1.14761200  |
| H   | -4.04121700 | -3.35294000 | 1.29501700  |
| C   | -4.29031000 | -1.53375000 | 0.18050000  |
| C   | -3.82167300 | -0.22333800 | 0.02468200  |
| H   | -4.27001200 | 0.43203500  | -0.72494000 |
| C   | -2.14350900 | -2.71474000 | 3.13980700  |
| C   | -0.74216800 | -2.29328100 | 3.58345100  |
| H   | -0.38052200 | -2.94702300 | 4.39110300  |
| H   | -0.71171700 | -1.26159700 | 3.96154500  |
| H   | -0.01279100 | -2.37603500 | 2.76032100  |
| C   | -2.11510100 | -4.20995300 | 2.79648600  |
| H   | -3.12024300 | -4.61115700 | 2.60437900  |
| H   | -1.69741100 | -4.78081000 | 3.64009700  |
| H   | -1.49861400 | -4.41587300 | 1.90879600  |
| C   | -3.11493700 | -2.48988400 | 4.31163800  |
| H   | -4.13582800 | -2.79586100 | 4.03748600  |
| H   | -3.14836700 | -1.42738400 | 4.59688900  |
| H   | -2.80442100 | -3.07580700 | 5.19202000  |
| C   | -5.46998300 | -2.01895700 | -0.66779500 |
| C   | -5.80828000 | -3.48793100 | -0.40406500 |
| H   | -6.11124700 | -3.66002900 | 0.64033900  |
| H   | -4.95838900 | -4.14890200 | -0.63416500 |
| H   | -6.64915200 | -3.79479100 | -1.04437500 |
| C   | -6.70018800 | -1.16438100 | -0.32136700 |
| H   | -7.57135700 | -1.49126600 | -0.91139400 |
| H   | -6.52995900 | -0.09895900 | -0.53696600 |
| H   | -6.95502200 | -1.25454800 | 0.74604400  |
| C   | -5.13787800 | -1.86258100 | -2.15819900 |
| H   | -5.99303100 | -2.18190700 | -2.77465000 |
| H   | -4.27070700 | -2.48072100 | -2.43026000 |
| H   | -4.90570400 | -0.82131800 | -2.42498900 |
| C   | -4.12502700 | 5.15730400  | 0.29487100  |
| C   | -5.53798800 | 4.57188600  | 0.35262600  |
| H   | -5.71838100 | 3.85848900  | -0.46649500 |
| H   | -6.28087700 | 5.37918100  | 0.25828800  |

|   |             |             |             |
|---|-------------|-------------|-------------|
| H | -5.72832800 | 4.05570700  | 1.30629600  |
| C | -3.97647300 | 6.16449900  | 1.44561100  |
| H | -4.74165800 | 6.95493400  | 1.37302400  |
| H | -2.98995700 | 6.65153400  | 1.43447300  |
| H | -4.08994800 | 5.66416500  | 2.41985300  |
| C | -3.96511100 | 5.88703800  | -1.04805800 |
| H | -4.06690900 | 5.18382200  | -1.88915300 |
| H | -2.97993200 | 6.36889900  | -1.13520000 |
| H | -4.73227000 | 6.67106200  | -1.15888300 |
| C | 4.12696100  | 5.24480600  | -0.20070500 |
| C | 3.54309400  | 6.65445200  | -0.31486900 |
| H | 2.82962500  | 6.73349100  | -1.14947000 |
| H | 4.35049100  | 7.38058400  | -0.49753800 |
| H | 3.02630900  | 6.95745400  | 0.60869100  |
| C | 5.13300300  | 5.23496200  | 0.96094200  |
| H | 5.61916700  | 4.25396700  | 1.07158000  |
| H | 4.63171500  | 5.46829300  | 1.91308400  |
| H | 5.92498600  | 5.98405100  | 0.79631100  |
| C | 4.85804900  | 4.92182000  | -1.51339800 |
| H | 5.33963000  | 3.93288200  | -1.48074300 |
| H | 5.64371700  | 5.66847000  | -1.71481600 |
| H | 4.15617000  | 4.92382700  | -2.36171800 |
| C | 2.94685200  | 0.39654700  | 0.52373300  |
| C | 3.50274300  | -0.25979000 | -0.57967400 |
| H | 3.55969600  | 0.28795900  | -1.52156800 |
| C | 3.99151800  | -1.57400200 | -0.48431900 |
| C | 3.91570500  | -2.20349400 | 0.75933500  |
| H | 4.31554000  | -3.21224500 | 0.86238200  |
| C | 3.36551500  | -1.58482700 | 1.89593700  |
| C | 2.84751300  | -0.29245900 | 1.75105200  |
| H | 2.42163200  | 0.24481900  | 2.59960100  |
| C | 4.64734500  | -2.24976400 | -1.69064700 |
| C | 3.92432800  | -1.85142600 | -2.98289300 |
| H | 4.30701700  | -2.44051100 | -3.83033300 |
| H | 4.07721400  | -0.79255400 | -3.23559500 |
| H | 2.84052400  | -2.01839400 | -2.90330800 |
| C | 6.10990600  | -1.78058000 | -1.75592000 |
| H | 6.61895900  | -2.22845100 | -2.62457400 |
| H | 6.66066800  | -2.06964600 | -0.84723800 |
| H | 6.16976200  | -0.68561400 | -1.85265300 |
| C | 4.61738300  | -3.77722300 | -1.56797200 |
| H | 3.59070300  | -4.15244000 | -1.43776100 |
| H | 5.22691900  | -4.14257900 | -0.72784500 |
| H | 5.02755100  | -4.23170600 | -2.48230000 |
| C | 3.45164800  | -2.30162800 | 3.24794600  |
| C | 4.93922200  | -2.45207100 | 3.61119800  |
| H | 5.04471400  | -2.94767600 | 4.58951400  |
| H | 5.43039000  | -1.46874300 | 3.66999100  |
| H | 5.48206800  | -3.05534000 | 2.86830700  |
| C | 2.81321500  | -3.69555500 | 3.15711100  |
| H | 1.75042400  | -3.63625700 | 2.88239300  |
| H | 2.88313800  | -4.21001300 | 4.12839200  |
| H | 3.31276000  | -4.33097100 | 2.41111400  |
| C | 2.76868400  | -1.50939300 | 4.36431600  |
| H | 1.70538700  | -1.32878200 | 4.15408700  |
| H | 3.25327100  | -0.53496200 | 4.52633700  |
| H | 2.83005900  | -2.06919300 | 5.30987900  |
| C | 0.60137100  | -3.82034600 | -0.14856800 |
| H | 1.62235000  | -3.42199800 | -0.00589400 |
| H | 0.68012900  | -4.91199900 | -0.02498700 |
| H | -0.03449400 | -3.49623400 | 0.69856500  |
| C | 0.84205000  | -4.31646500 | -3.17316700 |
| H | 0.80357300  | -5.40608100 | -3.01154200 |
| H | 1.89728200  | -4.00738500 | -3.19136700 |
| H | 0.42168700  | -4.11330500 | -4.17182000 |
| C | -1.88307300 | -4.15685100 | -1.83940900 |
| H | -2.38825700 | -4.00402700 | -2.80607300 |
| H | -2.49714000 | -3.67780800 | -1.06036600 |
| H | -1.85189100 | -5.24106000 | -1.64184400 |

#### 4.2.2 [(<sup>dtbp</sup>Cbz)CaN(SiMe<sub>3</sub>)<sub>2</sub>]<sub>2</sub>

|     |             |             |             |
|-----|-------------|-------------|-------------|
| 0 1 |             |             |             |
| Ca  | 1.47046300  | -0.70278600 | -0.09608800 |
| N   | 0.20829200  | 0.49483500  | 1.52553900  |
| Si  | -0.77384500 | -0.71069300 | 2.33820200  |
| C   | -2.49808100 | -0.05844500 | 2.73048100  |

|    |             |             |             |
|----|-------------|-------------|-------------|
| H  | -2.44170200 | 0.67340400  | 3.55019800  |
| H  | -3.12590400 | -0.89608100 | 3.07282100  |
| H  | -3.06071400 | 0.40637800  | 1.90193900  |
| C  | -0.95264300 | -2.12509700 | 1.09998700  |
| H  | -1.67434600 | -2.84967500 | 1.49998100  |
| H  | -0.01304100 | -2.68945500 | 0.96715600  |
| H  | -1.34922800 | -1.82726500 | 0.11797400  |
| C  | -0.12120700 | -1.47401700 | 3.92054400  |
| H  | -0.72354700 | -2.37030500 | 4.13406100  |
| H  | -0.20868600 | -0.80347300 | 4.78537300  |
| H  | 0.92700500  | -1.78964500 | 3.82142000  |
| Si | 0.85769600  | 1.80685200  | 2.50050700  |
| C  | 1.51454800  | 1.33354600  | 4.20140700  |
| H  | 2.07903400  | 2.19571700  | 4.59277800  |
| H  | 2.21068600  | 0.48258800  | 4.14590700  |
| H  | 0.72361200  | 1.09891400  | 4.92759500  |
| C  | 2.32623800  | 2.62321900  | 1.66056700  |
| H  | 2.62380900  | 3.51020000  | 2.24360300  |
| H  | 2.17076300  | 2.94299500  | 0.62287500  |
| H  | 3.17647700  | 1.92560900  | 1.68528700  |
| C  | -0.48903500 | 3.09884500  | 2.77477900  |
| H  | -0.12530300 | 3.91867900  | 3.41300200  |
| H  | -1.36190800 | 2.65611600  | 3.27564600  |
| H  | -0.85303000 | 3.57418300  | 1.84855800  |
| N  | 3.63247200  | -1.38864700 | 0.70162500  |
| C  | 3.10418300  | -2.47448000 | 1.37104900  |
| C  | 2.33155800  | -3.55357700 | 0.86394000  |
| C  | 1.84804300  | -4.49086400 | 1.79603100  |
| H  | 1.29327900  | -5.33762500 | 1.39390100  |
| C  | 2.11061300  | -4.45325800 | 3.17226800  |
| C  | 2.92065200  | -3.41524100 | 3.64625300  |
| H  | 3.18822400  | -3.35662400 | 4.70488600  |
| C  | 3.39792600  | -2.44498800 | 2.77093200  |
| C  | 4.21319500  | -1.27850200 | 2.95676700  |
| C  | 4.77984300  | -0.71554000 | 4.09904400  |
| H  | 4.62648100  | -1.20332900 | 5.06583000  |
| C  | 5.52751400  | 0.45742200  | 4.00205100  |
| C  | 5.70509700  | 1.00213800  | 2.71867700  |
| H  | 6.33416100  | 1.88492200  | 2.60092900  |
| C  | 5.16259200  | 0.46639200  | 1.54171000  |
| C  | 4.35382900  | -0.69173900 | 1.66090800  |
| C  | 2.14578500  | -3.86799000 | -0.57781100 |
| C  | 3.20446900  | -3.70991300 | -1.48261900 |
| H  | 4.09220800  | -3.17641800 | -1.13771900 |
| C  | 3.16059300  | -4.28843800 | -2.76017900 |
| C  | 2.00750200  | -4.98226700 | -3.12948300 |
| H  | 1.96298800  | -5.44857900 | -4.11320800 |
| C  | 0.89418000  | -5.10183700 | -2.28332300 |
| C  | 0.97906600  | -4.52916900 | -1.01606800 |
| H  | 0.14657400  | -4.62776700 | -0.31931300 |
| C  | 4.35953100  | -4.14364200 | -3.70208300 |
| C  | 5.65190500  | -4.52286000 | -2.96347000 |
| H  | 6.51851800  | -4.42251800 | -3.63589900 |
| H  | 5.60973200  | -5.56458600 | -2.60964500 |
| H  | 5.83843300  | -3.88170000 | -2.09056500 |
| C  | 4.43213600  | -2.68359900 | -4.16744400 |
| H  | 5.33487100  | -2.50992600 | -4.77356500 |
| H  | 4.46053200  | -1.99421700 | -3.31059700 |
| H  | 3.55280300  | -2.42221000 | -4.77337800 |
| C  | 4.24044900  | -5.03924600 | -4.93737600 |
| H  | 5.13752100  | -4.92502200 | -5.56502500 |
| H  | 3.37222900  | -4.77227700 | -5.55890100 |
| H  | 4.15600700  | -6.10236200 | -4.66328000 |
| C  | -0.32320100 | -5.90993700 | -2.74864500 |
| C  | -0.81685500 | -5.38584500 | -4.10560500 |
| H  | -1.70235000 | -5.95206300 | -4.43554500 |
| H  | -0.05131300 | -5.48448700 | -4.88926500 |
| H  | -1.09573500 | -4.32493000 | -4.03994100 |
| C  | 0.10245300  | -7.38010900 | -2.89597300 |
| H  | -0.74772600 | -7.99454700 | -3.23375300 |
| H  | 0.45787200  | -7.78366100 | -1.93521800 |
| H  | 0.91480500  | -7.49619300 | -3.62915400 |
| C  | -1.48293300 | -5.84368300 | -1.75108800 |
| H  | -2.33591600 | -6.42477400 | -2.13421500 |
| H  | -1.83113600 | -4.81239100 | -1.59227200 |
| H  | -1.21053500 | -6.27067300 | -0.77407800 |
| C  | 1.61341900  | -5.54483500 | 4.12754600  |

|    |             |             |             |
|----|-------------|-------------|-------------|
| C  | 0.64222500  | -6.51140500 | 3.44401900  |
| H  | 0.27395100  | -7.24856100 | 4.17433700  |
| H  | 1.12266800  | -7.07184600 | 2.62754400  |
| H  | -0.23210600 | -5.98381800 | 3.03174800  |
| C  | 2.82243500  | -6.34542100 | 4.63658500  |
| H  | 2.50055200  | -7.14273500 | 5.32660700  |
| H  | 3.53384600  | -5.70047600 | 5.17430400  |
| H  | 3.36315700  | -6.81184000 | 3.79862600  |
| C  | 0.88501300  | -4.91051400 | 5.32133200  |
| H  | 0.55853200  | -5.68930300 | 6.02931800  |
| H  | -0.00527100 | -4.35624800 | 4.99032900  |
| H  | 1.52758200  | -4.20892800 | 5.87327800  |
| C  | 6.13704300  | 1.08758900  | 5.25908900  |
| C  | 7.10620500  | 0.09048600  | 5.91243200  |
| H  | 7.55341100  | 0.52174500  | 6.82314900  |
| H  | 7.92098600  | -0.17284700 | 5.22038100  |
| H  | 6.59769700  | -0.84232700 | 6.19876000  |
| C  | 5.01281900  | 1.43181300  | 6.24824400  |
| H  | 5.42669300  | 1.87500300  | 7.16883700  |
| H  | 4.43433900  | 0.54108200  | 6.53547800  |
| H  | 4.30929100  | 2.15313600  | 5.80477000  |
| C  | 6.90752700  | 2.37267100  | 4.94779000  |
| H  | 7.31382400  | 2.79930100  | 5.87804500  |
| H  | 6.25951200  | 3.13458300  | 4.48726800  |
| H  | 7.75490400  | 2.18825800  | 4.26978500  |
| C  | 5.51285200  | 1.14687300  | 0.27012500  |
| C  | 5.39149600  | 2.54077300  | 0.18002300  |
| H  | 4.97669900  | 3.07426000  | 1.03310400  |
| C  | 5.74611000  | 3.23623400  | -0.97638100 |
| C  | 6.29919200  | 2.49998900  | -2.02884300 |
| H  | 6.60271500  | 3.02700900  | -2.93651800 |
| C  | 6.48619700  | 1.11336400  | -1.96286400 |
| C  | 6.04847200  | 0.44283600  | -0.81571300 |
| H  | 6.14306900  | -0.63908700 | -0.72413900 |
| C  | 5.52286200  | 4.74437100  | -1.13198700 |
| C  | 4.92601600  | 5.37221700  | 0.12990700  |
| H  | 4.77788400  | 6.45225600  | -0.02460200 |
| H  | 5.58860800  | 5.24827000  | 1.00015300  |
| H  | 3.94821800  | 4.93341200  | 0.38137500  |
| C  | 6.85970800  | 5.43675200  | -1.43449400 |
| H  | 6.71461100  | 6.52263200  | -1.55376700 |
| H  | 7.31756300  | 5.05774900  | -2.36027300 |
| H  | 7.57735200  | 5.27421000  | -0.61566100 |
| C  | 4.54428100  | 4.98375100  | -2.29328500 |
| H  | 4.36627500  | 6.06191200  | -2.43598500 |
| H  | 3.57406600  | 4.50302500  | -2.09032800 |
| H  | 4.92648000  | 4.57753400  | -3.24185100 |
| C  | 7.16032100  | 0.39923000  | -3.13915100 |
| C  | 8.50733800  | 1.07157100  | -3.44809700 |
| H  | 9.00969600  | 0.55317800  | -4.28062900 |
| H  | 9.17262700  | 1.03707700  | -2.57164300 |
| H  | 8.38940500  | 2.12589200  | -3.73848600 |
| C  | 6.24736300  | 0.50023300  | -4.37113900 |
| H  | 6.69113900  | -0.02760600 | -5.23097400 |
| H  | 6.08786200  | 1.54840500  | -4.66683000 |
| H  | 5.26076900  | 0.05762100  | -4.17080400 |
| C  | 7.43647900  | -1.07241600 | -2.82880800 |
| H  | 7.91999200  | -1.55548400 | -3.69211300 |
| H  | 6.51669900  | -1.63054300 | -2.61456200 |
| H  | 8.10794800  | -1.17972600 | -1.96327500 |
| N  | 0.00418200  | 0.37118500  | -1.79021800 |
| H  | 3.14591700  | 0.26940400  | -2.20458600 |
| H  | 3.04739300  | 1.17315500  | -0.66718300 |
| Ca | -1.44045400 | 1.29593600  | -0.14107100 |
| Si | 1.06783200  | 1.67462200  | -2.26484500 |
| Si | -0.48880100 | -0.72763400 | -3.07888500 |
| C  | 2.83005300  | 1.22425100  | -1.74721300 |
| N  | -3.79403300 | 1.14902800  | -0.61540000 |
| C  | 0.49182000  | 3.27193400  | -1.42293600 |
| C  | 1.16821400  | 2.15316800  | -4.08224100 |
| C  | -1.36406000 | 0.08448800  | -4.53948500 |
| C  | -1.61650300 | -2.05668100 | -2.38899500 |
| C  | 1.03150700  | -1.60873700 | -3.76916800 |
| H  | 3.55107600  | 1.97383600  | -2.10769300 |
| C  | -3.66327700 | 2.15501400  | -1.55284700 |
| C  | -4.33747600 | 0.07846100  | -1.31275200 |
| H  | 1.23488300  | 4.07119300  | -1.57481200 |

|   |             |             |             |
|---|-------------|-------------|-------------|
| H | -0.43999300 | 3.60412200  | -1.91099200 |
| H | 0.33121000  | 3.24506300  | -0.33168100 |
| H | 1.87550100  | 2.99488500  | -4.16810700 |
| H | 1.53475100  | 1.34299600  | -4.72902200 |
| H | 0.19185700  | 2.48601400  | -4.46329400 |
| H | -2.06521100 | -0.64128300 | -4.98144100 |
| H | -1.94703500 | 0.96394000  | -4.23403300 |
| H | -0.65652300 | 0.39271800  | -5.32256000 |
| H | -2.07811400 | -2.60525900 | -3.22242800 |
| H | -1.05625200 | -2.78134200 | -1.78154700 |
| H | -2.44773700 | -1.65176700 | -1.79469700 |
| H | 0.74459400  | -2.33547800 | -4.54622800 |
| H | 1.74457800  | -0.90228900 | -4.22167200 |
| H | 1.56958400  | -2.17866100 | -2.99457300 |
| C | -3.17231300 | 3.47899200  | -1.38743700 |
| C | -4.03606800 | 1.72312200  | -2.86443100 |
| C | -4.46581600 | 0.36402700  | -2.70559900 |
| C | -4.73520100 | -1.20213100 | -0.85910300 |
| C | -3.03207200 | 4.25780200  | -2.55269100 |
| C | -2.91771900 | 4.13735100  | -0.07891000 |
| C | -3.89594700 | 2.54112100  | -3.97934000 |
| C | -4.86300100 | -0.59858800 | -3.63270300 |
| C | -5.12756000 | -2.13896600 | -1.82561100 |
| C | -4.83116200 | -1.62710500 | 0.55744400  |
| H | -2.70089900 | 5.28640500  | -2.41832500 |
| C | -3.36346100 | 3.82735600  | -3.84430100 |
| C | -3.70478300 | 3.86263100  | 1.04770200  |
| C | -1.96619200 | 5.17557200  | 0.00875300  |
| H | -4.19314200 | 2.16101100  | -4.96044900 |
| H | -4.91395800 | -0.32899900 | -4.69122900 |
| C | -5.17439800 | -1.88949400 | -3.20787200 |
| H | -5.43619500 | -3.11602300 | -1.45336900 |
| C | -4.31236800 | -2.87099000 | 0.94181100  |
| C | -5.56687500 | -0.87955000 | 1.48505600  |
| C | -3.18806800 | 4.71655400  | -5.07984500 |
| H | -4.42938500 | 3.04852500  | 0.97849700  |
| C | -3.62189800 | 4.65685000  | 2.20383500  |
| C | -1.82831400 | 5.95616700  | 1.15036800  |
| H | -1.33293200 | 5.37108100  | -0.85361600 |
| C | -5.57310700 | -2.96347900 | -4.22633000 |
| H | -3.74368200 | -3.43540200 | 0.20223700  |
| C | -4.51505600 | -3.38458800 | 2.22513300  |
| C | -5.81652500 | -1.37141100 | 2.76940800  |
| H | -5.96637400 | 0.08151200  | 1.16137900  |
| C | -2.57338900 | 6.07477200  | -4.73428300 |
| C | -4.55690300 | 4.95677000  | -5.73461500 |
| C | -2.25803700 | 4.01203400  | -6.08002200 |
| C | -2.68422000 | 5.68925300  | 2.23133600  |
| C | -4.57502700 | 4.39026600  | 3.37363700  |
| C | -0.79115200 | 7.07936700  | 1.25366600  |
| C | -6.88124100 | -2.54840300 | -4.91646900 |
| C | -4.46377700 | -3.10809100 | -5.28008200 |
| C | -5.78001500 | -4.33186500 | -3.57220600 |
| C | -5.27141600 | -2.61484800 | 3.11588800  |
| C | -3.96786000 | -4.74647100 | 2.67071400  |
| C | -6.66914400 | -0.61951600 | 3.79687000  |
| H | -2.44607000 | 6.67104100  | -5.65093000 |
| H | -3.21341900 | 6.65316400  | -4.05031500 |
| H | -1.58110700 | 5.96635000  | -4.26866700 |
| H | -4.45352100 | 5.59064600  | -6.63039400 |
| H | -5.03002800 | 4.01333000  | -6.04542300 |
| H | -5.24235000 | 5.45901500  | -5.03465600 |
| H | -2.13221800 | 4.62167700  | -6.98946900 |
| H | -1.26211900 | 3.84765000  | -5.64001600 |
| H | -2.65125200 | 3.03111300  | -6.38584100 |
| H | -2.60062100 | 6.30730900  | 3.12501600  |
| C | -6.02401600 | 4.42991400  | 2.86291100  |
| C | -4.27253400 | 3.00787400  | 3.96334300  |
| C | -4.43377100 | 5.42919700  | 4.48795000  |
| C | 0.18538600  | 6.77023600  | 2.39883800  |
| C | -1.51173500 | 8.40682000  | 1.53430200  |
| C | 0.02234600  | 7.23353400  | -0.03383500 |
| H | -7.18839600 | -3.30291400 | -5.65933100 |
| H | -7.69275600 | -2.43914800 | -4.18059900 |
| H | -6.77369100 | -1.58585500 | -5.43900300 |
| H | -4.74424200 | -3.85822100 | -6.03733300 |
| H | -4.26913600 | -2.16141700 | -5.80584900 |



|   |             |             |             |
|---|-------------|-------------|-------------|
| H | -3.52022700 | -3.43382500 | -4.81517900 |
| H | -6.03266000 | -5.07892900 | -4.34070300 |
| H | -4.86929200 | -4.67613100 | -3.05679400 |
| H | -6.60332900 | -4.31878900 | -2.84187500 |
| H | -5.45463800 | -3.00432000 | 4.12010900  |
| C | -3.20182500 | -5.45894900 | 1.55298900  |
| C | -5.13903300 | -5.64604000 | 3.09513600  |
| C | -3.01528200 | -4.55045100 | 3.85964200  |
| C | -7.86165500 | -1.49740700 | 4.20725300  |
| C | -5.81070500 | -0.31027600 | 5.03327300  |
| C | -7.21757700 | 0.69303700  | 3.23542700  |
| H | -6.72669200 | 4.23817400  | 3.68945500  |
| H | -6.26025100 | 5.41491500  | 2.43153900  |
| H | -6.21009800 | 3.67278700  | 2.08785700  |
| H | -4.99139500 | 2.76048500  | 4.75986200  |
| H | -4.32883900 | 2.21861100  | 3.20064300  |
| H | -3.26183100 | 2.98140600  | 4.39843800  |
| H | -5.14878600 | 5.20576200  | 5.29448900  |
| H | -3.42622800 | 5.42167600  | 4.93157100  |
| H | -4.64582300 | 6.44776600  | 4.12774000  |
| H | 0.91293200  | 7.58962800  | 2.51383100  |
| H | -0.33550000 | 6.64658100  | 3.36014900  |
| H | 0.74481600  | 5.84377600  | 2.19811900  |
| H | -0.78437400 | 9.23134300  | 1.60540000  |
| H | -2.22315500 | 8.64491800  | 0.72853000  |
| H | -2.07371600 | 8.37670500  | 2.47958400  |
| H | 0.75464100  | 8.04679100  | 0.08423700  |
| H | 0.58304500  | 6.31688000  | -0.27454200 |
| H | -0.61507100 | 7.48397200  | -0.89588600 |
| H | -2.83436100 | -6.43198000 | 1.91404700  |
| H | -3.83711100 | -5.64802000 | 0.67435300  |
| H | -2.32623800 | -4.88256300 | 1.21848500  |
| H | -4.76937800 | -6.63377800 | 3.41461500  |
| H | -5.70485500 | -5.21406200 | 3.93375500  |
| H | -5.84026800 | -5.79506400 | 2.25964200  |
| H | -2.62523600 | -5.51928300 | 4.21029900  |
| H | -2.15514900 | -3.92621500 | 3.57393700  |
| H | -3.51407400 | -4.06103500 | 4.70930500  |
| H | -8.48969300 | -0.97108000 | 4.94413300  |
| H | -8.48732300 | -1.74060900 | 3.33463400  |
| H | -7.53795500 | -2.44546600 | 4.66200400  |
| H | -6.39349800 | 0.25650000  | 5.77749100  |
| H | -5.45331900 | -1.23014000 | 5.52015500  |
| H | -4.92817300 | 0.28596400  | 4.75971800  |
| H | -7.81654200 | 1.20813800  | 4.00241300  |
| H | -6.41331400 | 1.37654900  | 2.93200200  |
| H | -7.86738400 | 0.52188000  | 2.36381700  |

#### 4.2.3 [(<sup>dtbp</sup>Cbz)Ca(C<sub>6</sub>H<sub>6</sub>)H]<sub>2</sub>

|     |             |             |             |
|-----|-------------|-------------|-------------|
| 0 1 |             |             |             |
| Ca  | -1.33435700 | -1.07551100 | -0.03353600 |
| H   | -0.82256000 | 1.01408200  | -0.05830000 |
| N   | -2.77868600 | -1.31756800 | 1.81488100  |
| C   | -3.37567400 | -0.22852200 | 2.40892200  |
| C   | -4.30992600 | 0.67257400  | 1.85712400  |
| C   | -4.69197700 | 1.77113100  | 2.63213300  |
| H   | -5.42183300 | 2.45071000  | 2.18954500  |
| C   | -4.21575900 | 2.01544500  | 3.93631200  |
| C   | -3.32224200 | 1.09301500  | 4.48472900  |
| H   | -2.93543300 | 1.22956600  | 5.49880800  |
| C   | -2.90650500 | -0.01252700 | 3.74022900  |
| C   | -1.96216000 | -1.07033900 | 3.98605200  |
| C   | -1.10662400 | -1.37964200 | 5.04301600  |
| H   | -1.14349600 | -0.77570900 | 5.95397500  |
| C   | -0.17749200 | -2.42014400 | 4.92157000  |
| C   | -0.16963900 | -3.16015100 | 3.72323300  |
| H   | 0.52032900  | -3.99742700 | 3.61155100  |
| C   | -1.03607800 | -2.90877000 | 2.65144800  |
| C   | -1.93931200 | -1.82881300 | 2.77459400  |
| C   | -4.94319600 | 0.47065600  | 0.53045400  |
| C   | -5.71488800 | -0.67516000 | 0.29058400  |
| H   | -5.74486200 | -1.43683900 | 1.06943500  |
| C   | -6.45952400 | -0.81216000 | -0.88397300 |
| C   | -6.36661400 | 0.20825000  | -1.84233000 |
| H   | -6.94009500 | 0.11123900  | -2.76665100 |
| C   | -5.57889200 | 1.34966100  | -1.65804300 |

|   |             |             |             |
|---|-------------|-------------|-------------|
| C | -4.87816100 | 1.46634200  | -0.45123500 |
| H | -4.26623800 | 2.34343000  | -0.24286100 |
| C | -7.36332700 | -2.02050000 | -1.15561300 |
| C | -7.47197000 | -2.93890800 | 0.06343100  |
| H | -6.49706900 | -3.34711000 | 0.36362100  |
| H | -8.12966100 | -3.79107700 | -0.16772500 |
| H | -7.89901300 | -2.40939900 | 0.92867900  |
| C | -6.78924400 | -2.82182800 | -2.33454300 |
| H | -6.71538800 | -2.20749200 | -3.24485000 |
| H | -7.42880300 | -3.68967500 | -2.56331600 |
| H | -5.78154000 | -3.19976000 | -2.10395900 |
| C | -8.77821300 | -1.53743200 | -1.51027100 |
| H | -8.79165100 | -0.92217500 | -2.42193600 |
| H | -9.20276600 | -0.93560600 | -0.69207900 |
| H | -9.44315200 | -2.39868500 | -1.68334700 |
| C | -5.56396000 | 2.45008400  | -2.72672700 |
| C | -5.32205000 | 1.85523300  | -4.12203000 |
| H | -5.30751200 | 2.65555400  | -4.87868900 |
| H | -6.10854800 | 1.14380300  | -4.41270900 |
| H | -4.35855300 | 1.32696400  | -4.17659500 |
| C | -6.93125800 | 3.15300000  | -2.70883800 |
| H | -6.96468100 | 3.95772500  | -3.46128900 |
| H | -7.13030900 | 3.59627300  | -1.72097100 |
| H | -7.74635900 | 2.44686100  | -2.92873200 |
| C | -4.47885100 | 3.49508600  | -2.45509700 |
| H | -3.47317800 | 3.04613100  | -2.41420100 |
| H | -4.64917600 | 4.02635400  | -1.50779000 |
| H | -4.47251400 | 4.24881800  | -3.25727600 |
| C | -4.65956900 | 3.22899000  | 4.76336000  |
| C | -5.62183000 | 4.13757300  | 3.99437400  |
| H | -5.16336700 | 4.53502700  | 3.07557800  |
| H | -5.90579300 | 4.99708900  | 4.62132700  |
| H | -6.54671500 | 3.61087700  | 3.71407400  |
| C | -3.42733300 | 4.06052800  | 5.15410800  |
| H | -2.90147000 | 4.42549800  | 4.25877500  |
| H | -2.71031100 | 3.47253800  | 5.74635500  |
| H | -3.72228100 | 4.93427800  | 5.75827000  |
| C | -5.37265400 | 2.74567900  | 6.03571900  |
| H | -5.69823100 | 3.60150800  | 6.64987200  |
| H | -4.71505900 | 2.11852300  | 6.65602500  |
| H | -6.26068700 | 2.14673900  | 5.78120700  |
| C | 0.79993900  | -2.70702700 | 6.06798000  |
| C | 1.62704800  | -1.44404500 | 6.35730600  |
| H | 2.19873400  | -1.13708500 | 5.46769700  |
| H | 2.34110400  | -1.62605200 | 7.17710700  |
| H | 0.99109600  | -0.59552800 | 6.65014800  |
| C | 0.01194300  | -3.10257800 | 7.32565800  |
| H | -0.68058400 | -2.30620000 | 7.63701100  |
| H | 0.69512500  | -3.30213000 | 8.16755800  |
| H | -0.58417700 | -4.01008100 | 7.14345300  |
| C | 1.77235400  | -3.84009100 | 5.73103500  |
| H | 2.38196900  | -3.60497800 | 4.84480700  |
| H | 1.24771700  | -4.78968100 | 5.54469600  |
| H | 2.46214000  | -4.00246500 | 6.57386700  |
| C | -0.99144100 | -3.77875800 | 1.45012600  |
| C | 0.23017400  | -4.07723700 | 0.83750800  |
| H | 1.12495600  | -3.57004500 | 1.20300600  |
| C | 0.31864300  | -4.99842800 | -0.21576100 |
| C | -0.85734100 | -5.62401200 | -0.63324700 |
| H | -0.80525500 | -6.36723800 | -1.42808400 |
| C | -2.10949500 | -5.33462000 | -0.06361300 |
| C | -2.16286300 | -4.38604300 | 0.95985700  |
| H | -3.10575100 | -4.12238400 | 1.43855700  |
| C | 1.68756200  | -5.29998400 | -0.83030900 |
| C | 2.34782200  | -3.99088200 | -1.28267600 |
| H | 3.37888100  | -4.17325900 | -1.61957000 |
| H | 2.37943100  | -3.23361700 | -0.48747000 |
| H | 1.80815300  | -3.53338300 | -2.12490500 |
| C | 2.55847200  | -5.97528000 | 0.24121300  |
| H | 3.56306500  | -6.19079300 | -0.15763300 |
| H | 2.10876100  | -6.92424200 | 0.57221300  |
| H | 2.67746100  | -5.33514300 | 1.12687100  |
| C | 1.59391600  | -6.23482500 | -2.03755900 |
| H | 0.96301400  | -5.81099700 | -2.83494000 |
| H | 1.18994300  | -7.22273600 | -1.76742300 |
| H | 2.59677800  | -6.39387000 | -2.46268500 |
| C | -3.34918300 | -6.13091500 | -0.48922900 |

|    |             |             |             |
|----|-------------|-------------|-------------|
| C  | -3.29366600 | -7.49390400 | 0.22087400  |
| H  | -4.17221800 | -8.10557700 | -0.04187200 |
| H  | -3.27706800 | -7.36511500 | 1.31383200  |
| H  | -2.38906500 | -8.05249200 | -0.06489900 |
| C  | -3.38269200 | -6.36467100 | -2.00635900 |
| H  | -3.39751500 | -5.41834300 | -2.56852500 |
| H  | -4.28947000 | -6.92677900 | -2.27836000 |
| H  | -2.52246300 | -6.95069100 | -2.36055700 |
| C  | -4.63985100 | -5.41349700 | -0.08840900 |
| H  | -4.66919600 | -4.38925900 | -0.48888200 |
| H  | -4.75930100 | -5.34779400 | 1.00275400  |
| H  | -5.51495300 | -5.95383700 | -0.48040600 |
| C  | -2.47049000 | -2.53819400 | -2.25844400 |
| H  | -3.01930400 | -3.44181700 | -1.99197500 |
| C  | -1.10678300 | -2.61898500 | -2.56059500 |
| H  | -0.60507000 | -3.58750000 | -2.52411000 |
| C  | -0.38501700 | -1.45861600 | -2.86743200 |
| H  | 0.68563200  | -1.50512700 | -3.08255500 |
| C  | -1.03622000 | -0.22082200 | -2.87330800 |
| H  | -0.48016000 | 0.68999000  | -3.09088700 |
| C  | -2.39995300 | -0.14425100 | -2.57763100 |
| H  | -2.89498100 | 0.82612300  | -2.54655400 |
| C  | -3.12359700 | -1.29872100 | -2.27011700 |
| H  | -4.18242900 | -1.22372500 | -2.01674400 |
| H  | 0.82258800  | -1.01408500 | 0.05842300  |
| Ca | 1.33438400  | 1.07552900  | 0.03361800  |
| N  | 2.77862800  | 1.31752700  | -1.81486200 |
| C  | 3.12347400  | 1.29875500  | 2.27029200  |
| C  | 3.37561000  | 0.22843800  | -2.40883300 |
| C  | 2.39972300  | 0.14434500  | 2.57778800  |
| H  | 2.89467000  | -0.82607500 | 2.54675600  |
| C  | 1.93922800  | 1.82868700  | -2.77459800 |
| C  | 2.47045500  | 2.53827600  | 2.25854700  |
| H  | 4.18232300  | 1.22368100  | 2.01700400  |
| C  | 4.30991800  | -0.67257500 | -1.85699800 |
| C  | 2.90638100  | 0.01230400  | -3.74009700 |
| C  | 1.03597800  | 0.22102900  | 2.87339200  |
| C  | 1.96203700  | 1.07010500  | -3.98599100 |
| C  | 1.03604800  | 2.90869600  | -2.65156400 |
| H  | 3.01935200  | 3.44184800  | 1.99207300  |
| C  | 1.10673500  | 2.61917500  | 2.56061600  |
| C  | 4.69197800  | -1.77118200 | -2.63192900 |
| C  | 4.94321500  | -0.47056800 | -0.53035000 |
| C  | 3.32212400  | -1.09328900 | -4.48451800 |
| C  | 0.38486800  | 1.45887200  | 2.86746200  |
| H  | 0.47983900  | -0.68973900 | 3.09094600  |
| C  | 1.10649700  | 1.37933300  | -5.04297500 |
| C  | 0.16961100  | 3.16001600  | -3.72336400 |
| C  | 0.99143900  | 3.77876300  | -1.45030000 |
| H  | 0.60509300  | 3.58772400  | 2.52407100  |
| H  | 5.42186100  | -2.45070900 | -2.18930400 |
| C  | 4.21569600  | -2.01563800 | -3.93605600 |
| C  | 5.71489700  | 0.67526100  | -0.29053700 |
| C  | 4.87821400  | -1.46622600 | 0.45137600  |
| H  | 2.93525200  | -1.22996100 | -5.49855600 |
| H  | -0.68578700 | 1.50546600  | 3.08253700  |
| H  | 1.14332500  | 0.77529300  | -5.95386400 |
| C  | 0.17740400  | 2.41988400  | -4.92162100 |
| H  | -0.52030300 | 3.99734700  | -3.61175500 |
| C  | -0.23016300 | 4.07734800  | -0.83772000 |
| C  | 2.16289800  | 4.38598100  | -0.96002500 |
| C  | 4.65950200  | -3.22925700 | -4.76299400 |
| H  | 5.74484700  | 1.43691600  | -1.06941400 |
| C  | 6.45956300  | 0.81230800  | 0.88399700  |
| C  | 5.57900700  | -1.34951300 | 1.65814600  |
| H  | 4.26629300  | -2.34332700 | 0.24304100  |
| C  | -0.80008600 | 2.70666500  | -6.06800600 |
| H  | -1.12497800 | 3.57021200  | -1.20321700 |
| C  | -0.31859000 | 4.99860900  | 0.21549000  |
| C  | 2.10957100  | 5.33463300  | 0.06337600  |
| H  | 3.10577500  | 4.12222400  | -1.43869300 |
| C  | 5.62161300  | -4.13786100 | -3.99384800 |
| C  | 3.42725900  | -4.06074200 | -5.15382800 |
| C  | 5.37275800  | -2.74604900 | -6.03529900 |
| C  | 6.36670500  | -0.20807800 | 1.84237900  |
| C  | 7.36334700  | 2.02067300  | 1.15558800  |
| C  | 5.56417600  | -2.44991400 | 2.72684700  |

|   |             |             |             |
|---|-------------|-------------|-------------|
| C | -1.62722300 | 1.44366200  | -6.35716500 |
| C | -0.01216300 | 3.10209400  | -7.32576600 |
| C | -1.77248000 | 3.83976200  | -5.73110200 |
| C | 0.85742500  | 5.62414000  | 0.63296800  |
| C | -1.68750000 | 5.30027600  | 0.82998700  |
| C | 3.34929300  | 6.13089700  | 0.48895000  |
| H | 5.16302300  | -4.53521700 | -3.07507000 |
| H | 5.90557600  | -4.99744000 | -4.62071400 |
| H | 6.54651100  | -3.61122200 | -3.71348600 |
| H | 2.90127500  | -4.42563100 | -4.25853300 |
| H | 2.71033400  | -3.47275000 | -5.74619100 |
| H | 3.72222400  | -4.93453900 | -5.75791200 |
| H | 5.69836300  | -3.60192500 | -6.64937400 |
| H | 4.71526100  | -2.11888700 | -6.65570400 |
| H | 6.26079200  | -2.14714100 | -5.78071600 |
| H | 6.94020400  | -0.11102400 | 2.76668400  |
| C | 7.47188500  | 2.93909300  | -0.06345800 |
| C | 6.78931300  | 2.82195900  | 2.33456900  |
| C | 8.77827700  | 1.53765600  | 1.51014700  |
| C | 5.32277500  | -1.85498800 | 4.12220200  |
| C | 6.93134600  | -3.15307400 | 2.70858200  |
| C | 4.47880600  | -3.49472300 | 2.45553600  |
| H | -2.19886900 | 1.13679500  | -5.46749900 |
| H | -2.34131900 | 1.62559900  | -7.17694700 |
| H | -0.99129700 | 0.59510800  | -6.64995300 |
| H | 0.68034700  | 2.30568600  | -7.63708000 |
| H | -0.69539300 | 3.30156000  | -8.16764800 |
| H | 0.58396500  | 4.00961600  | -7.14368700 |
| H | -2.38206500 | 3.60471900  | -4.84483100 |
| H | -1.24782700 | 4.78936200  | -5.54485400 |
| H | -2.46229800 | 4.00207600  | -6.57391700 |
| H | 0.80537200  | 6.36741800  | 1.42775800  |
| C | -2.34782000 | 3.99123200  | 1.28242500  |
| C | -2.55834800 | 5.97553300  | -0.24161100 |
| C | -1.59384300 | 6.23519500  | 2.03717700  |
| C | 3.29390800  | 7.49379400  | -0.22134200 |
| C | 3.38273200  | 6.36486800  | 2.00604700  |
| C | 4.63993900  | 5.41334300  | 0.08829900  |
| H | 6.49696100  | 3.34729600  | -0.36356800 |
| H | 8.12959500  | 3.79125900  | 0.16764900  |
| H | 7.89885700  | 2.40958800  | -0.92874400 |
| H | 6.71554900  | 2.20760000  | 3.24486700  |
| H | 7.42884700  | 3.68983100  | 2.56331400  |
| H | 5.78157300  | 3.19984400  | 2.10406400  |
| H | 8.79181100  | 0.92241000  | 2.42181600  |
| H | 9.20279100  | 0.93584100  | 0.69192700  |
| H | 9.44319600  | 2.39893700  | 1.68316500  |
| H | 5.30833000  | -2.65528100 | 4.87889200  |
| H | 6.10947500  | -1.14367800 | 4.41262700  |
| H | 4.35937900  | -1.32655900 | 4.17702800  |
| H | 6.96483300  | -3.95780400 | 3.46102400  |
| H | 7.13004600  | -3.59638300 | 1.72066000  |
| H | 7.74663200  | -2.44707900 | 2.92825000  |
| H | 3.47320000  | -3.04559200 | 2.41494500  |
| H | 4.64875900  | -4.02600700 | 1.50817100  |
| H | 4.47258400  | -4.24846600 | 3.25770400  |
| H | -3.37888200 | 4.17368300  | 1.61927500  |
| H | -2.37943200 | 3.23392100  | 0.48726600  |
| H | -1.80818700 | 3.53376300  | 2.12469300  |
| H | -3.56293100 | 6.19116600  | 0.15719800  |
| H | -2.10855800 | 6.92442600  | -0.57269900 |
| H | -2.67737600 | 5.33531400  | -1.12720700 |
| H | -0.96296300 | 5.81139900  | 2.83459400  |
| H | -1.18984000 | 7.22307800  | 1.76698500  |
| H | -2.59670700 | 6.39429700  | 2.46227800  |
| H | 4.17248200  | 8.10544700  | 0.04137600  |
| H | 3.27737000  | 7.36485500  | -1.31428400 |
| H | 2.38932400  | 8.05247600  | 0.06429800  |
| H | 3.39741300  | 5.41862100  | 2.56835200  |
| H | 4.28955300  | 6.92691800  | 2.27802500  |
| H | 2.52254400  | 6.95103200  | 2.36010300  |
| H | 4.66917100  | 4.38913700  | 0.48886400  |
| H | 4.75946800  | 5.34752900  | -1.00284900 |
| H | 5.51505300  | 5.95364900  | 0.48031300  |

#### 4.2.4 [(<sup>dtbp</sup>Cbz)Yb(C<sub>6</sub>H<sub>6</sub>)H]<sub>2</sub>

|    |             |             |             |
|----|-------------|-------------|-------------|
| 0  | 1           |             |             |
| Yb | -1.91406000 | -0.17014000 | -0.56453700 |
| H  | -0.14953200 | 1.25020200  | 0.01178800  |
| N  | -3.34246500 | -0.33387700 | 1.63425200  |
| C  | -3.18990100 | 0.71085200  | 2.51020800  |
| C  | -3.20399500 | 2.09343000  | 2.22975900  |
| C  | -2.88476700 | 2.97454800  | 3.26809700  |
| H  | -2.89759600 | 4.03937400  | 3.03053500  |
| C  | -2.58935200 | 2.55694900  | 4.58272400  |
| C  | -2.61884200 | 1.18557100  | 4.85352300  |
| H  | -2.39515000 | 0.81688000  | 5.85902100  |
| C  | -2.90405000 | 0.27026800  | 3.83859700  |
| C  | -2.88716700 | -1.16733700 | 3.75836000  |
| C  | -2.58464500 | -2.18143600 | 4.66863500  |
| H  | -2.38199900 | -1.91982000 | 5.71175400  |
| C  | -2.52054100 | -3.51363200 | 4.24975500  |
| C  | -2.79124700 | -3.79149100 | 2.89473900  |
| H  | -2.76693300 | -4.82337600 | 2.54077500  |
| C  | -3.11343700 | -2.80975800 | 1.95303800  |
| C  | -3.15432700 | -1.46607100 | 2.38691900  |
| C  | -3.56138300 | 2.63696300  | 0.89529900  |
| C  | -4.82837700 | 2.38409600  | 0.33488200  |
| H  | -5.49351600 | 1.71007800  | 0.87498800  |
| C  | -5.24672000 | 3.03766200  | -0.82479800 |
| C  | -4.33808000 | 3.90311500  | -1.46291600 |
| H  | -4.66133100 | 4.41969700  | -2.36744100 |
| C  | -3.06432200 | 4.15764900  | -0.95638900 |
| C  | -2.69399400 | 3.50731000  | 0.23187400  |
| H  | -1.71740200 | 3.69012200  | 0.68190300  |
| C  | -6.67833400 | 2.93521700  | -1.36629500 |
| C  | -7.55334000 | 2.01532200  | -0.51305800 |
| H  | -7.15554800 | 0.99190100  | -0.47200100 |
| H  | -8.56631000 | 1.96081000  | -0.94077000 |
| H  | -7.64672300 | 2.38672400  | 0.51850000  |
| C  | -6.66542700 | 2.40632700  | -2.80736300 |
| H  | -6.04373400 | 3.02830100  | -3.46905600 |
| H  | -7.68548800 | 2.39394900  | -3.22331500 |
| H  | -6.28049700 | 1.37720500  | -2.84232000 |
| C  | -7.30978400 | 4.33782200  | -1.34886400 |
| H  | -6.76865400 | 5.04185800  | -1.99823000 |
| H  | -7.31002200 | 4.75343000  | -0.32951000 |
| H  | -8.35275400 | 4.29196600  | -1.70146200 |
| C  | -2.11095800 | 5.18281700  | -1.57920700 |
| C  | -2.62225600 | 5.72885000  | -2.91357700 |
| H  | -1.88308700 | 6.42626700  | -3.33696600 |
| H  | -3.56890200 | 6.27901500  | -2.80100100 |
| H  | -2.77631900 | 4.92700900  | -3.65334500 |
| C  | -1.97442700 | 6.35647500  | -0.59365600 |
| H  | -1.31435500 | 7.13487500  | -1.00950500 |
| H  | -1.54581500 | 6.03065100  | 0.36504100  |
| H  | -2.95580300 | 6.81043500  | -0.38664800 |
| C  | -0.73119000 | 4.55618200  | -1.81332400 |
| H  | -0.73968700 | 3.84593600  | -2.65089300 |
| H  | -0.36783100 | 4.00277600  | -0.93772400 |
| H  | 0.00692900  | 5.33466200  | -2.05936800 |
| C  | -2.23803600 | 3.54652000  | 5.70143500  |
| C  | -2.33377900 | 5.00269100  | 5.24022500  |
| H  | -1.63339000 | 5.21759900  | 4.41932900  |
| H  | -2.08220500 | 5.67621300  | 6.07428100  |
| H  | -3.34955000 | 5.25654500  | 4.90029700  |
| C  | -0.79818200 | 3.28761300  | 6.17374800  |
| H  | -0.08164500 | 3.44407900  | 5.35216100  |
| H  | -0.66755600 | 2.25614900  | 6.53443300  |
| H  | -0.52745900 | 3.96994900  | 6.99634600  |
| C  | -3.20348200 | 3.35704800  | 6.88130600  |
| H  | -2.96674200 | 4.06306100  | 7.69418400  |
| H  | -3.14760800 | 2.34015000  | 7.29713400  |
| H  | -4.24374000 | 3.53151800  | 6.56581200  |
| C  | -2.15558400 | -4.60895600 | 5.25962600  |
| C  | -0.77668400 | -4.30160200 | 5.86689200  |
| H  | -0.00556700 | -4.26283900 | 5.08201600  |
| H  | -0.48695500 | -5.07821900 | 6.59374000  |
| H  | -0.76903900 | -3.33484200 | 6.39238300  |
| C  | -3.20781000 | -4.64751400 | 6.37828700  |
| H  | -3.27432600 | -3.68389300 | 6.90512300  |

|    |             |             |             |
|----|-------------|-------------|-------------|
| H  | -2.95955200 | -5.42193300 | 7.12282100  |
| H  | -4.20443300 | -4.87140000 | 5.96764800  |
| C  | -2.09158500 | -5.99651300 | 4.61634200  |
| H  | -1.33512400 | -6.04394100 | 3.81717400  |
| H  | -3.06028900 | -6.29295800 | 4.18621900  |
| H  | -1.82010900 | -6.74826500 | 5.37372500  |
| C  | -3.36579800 | -3.18292900 | 0.54108500  |
| C  | -2.46405500 | -3.99910600 | -0.15376000 |
| H  | -1.55752800 | -4.31249000 | 0.36472600  |
| C  | -2.69491800 | -4.39911500 | -1.47482100 |
| C  | -3.88405000 | -3.98464400 | -2.08587600 |
| H  | -4.09378500 | -4.30897900 | -3.10317500 |
| C  | -4.82043900 | -3.17802200 | -1.42330000 |
| C  | -4.52759900 | -2.75784900 | -0.12068500 |
| H  | -5.22359600 | -2.12414200 | 0.43275300  |
| C  | -1.66590200 | -5.28819900 | -2.18135800 |
| C  | -0.28925400 | -4.61277300 | -2.13733600 |
| H  | 0.47595900  | -5.25816900 | -2.59621800 |
| H  | 0.01961500  | -4.40422200 | -1.10552800 |
| H  | -0.28239400 | -3.64917600 | -2.66627100 |
| C  | -1.58955800 | -6.63470500 | -1.44334500 |
| H  | -0.85551500 | -7.29865100 | -1.92786900 |
| H  | -2.56696800 | -7.14153200 | -1.44584700 |
| H  | -1.28143000 | -6.50337700 | -0.39514400 |
| C  | -2.02901300 | -5.55438400 | -3.64340200 |
| H  | -2.11056100 | -4.62109700 | -4.22263200 |
| H  | -2.97980100 | -6.10065600 | -3.74040900 |
| H  | -1.24591200 | -6.16628500 | -4.11656300 |
| C  | -6.17114700 | -2.80808300 | -2.04619000 |
| C  | -7.28646600 | -3.45935200 | -1.21176800 |
| H  | -8.27514900 | -3.22277200 | -1.63728800 |
| H  | -7.27205000 | -3.10416900 | -0.17081100 |
| H  | -7.17263100 | -4.55416000 | -1.19364700 |
| C  | -6.30671400 | -3.29499900 | -3.49069200 |
| H  | -5.52891100 | -2.87478200 | -4.14807600 |
| H  | -7.28205000 | -2.98684500 | -3.89722000 |
| H  | -6.25207200 | -4.39192800 | -3.56021500 |
| C  | -6.34917000 | -1.28618200 | -2.02619500 |
| H  | -5.59168500 | -0.79386400 | -2.65289600 |
| H  | -6.25134500 | -0.87767200 | -1.01058700 |
| H  | -7.34146400 | -1.00073800 | -2.40930900 |
| C  | -2.90996900 | -0.77089000 | -3.74450300 |
| H  | -3.73123700 | -1.48705700 | -3.80774300 |
| C  | -1.58854500 | -1.21202500 | -3.86144600 |
| H  | -1.38100900 | -2.27023200 | -4.02921600 |
| C  | -0.53025100 | -0.30431500 | -3.75331300 |
| H  | 0.50276400  | -0.65160100 | -3.83067600 |
| C  | -0.79240400 | 1.05330400  | -3.53663600 |
| H  | 0.04268800  | 1.75308000  | -3.44720300 |
| C  | -2.11557100 | 1.49778900  | -3.43189500 |
| H  | -2.33484500 | 2.55168000  | -3.25224600 |
| C  | -3.17405500 | 0.58806500  | -3.53165000 |
| H  | -4.20137800 | 0.94690100  | -3.44036500 |
| H  | -0.09317100 | -1.59307900 | -0.32180200 |
| Yb | 1.63925700  | -0.20041500 | 0.34914700  |
| N  | 3.36605900  | 0.21069000  | -1.60947300 |
| C  | 2.94113400  | -0.70689600 | 3.74013200  |
| C  | 3.30773400  | -0.85371600 | -2.47480300 |
| C  | 1.68371400  | -1.08873200 | 4.21397800  |
| H  | 1.54930200  | -2.06310000 | 4.68928600  |
| C  | 3.10508800  | 1.31450700  | -2.38249700 |
| C  | 3.10404400  | 0.55011800  | 3.14829900  |
| H  | 3.79328900  | -1.38394800 | 3.82500000  |
| C  | 3.41866400  | -2.22574300 | -2.16730300 |
| C  | 3.00042900  | -0.45840000 | -3.81136800 |
| C  | 0.58731100  | -0.23591700 | 4.06950800  |
| C  | 2.86574900  | 0.97420200  | -3.75099100 |
| C  | 2.99441500  | 2.66352300  | -1.97394000 |
| H  | 4.08040900  | 0.86360100  | 2.77304000  |
| C  | 2.01040200  | 1.41859900  | 3.02556700  |
| C  | 3.17809200  | -3.14963900 | -3.18603200 |
| C  | 3.73211700  | -2.68444400 | -0.78973300 |
| C  | 2.79169800  | -1.41402400 | -4.80889200 |
| C  | 0.74520000  | 1.01798900  | 3.47169600  |
| H  | -0.40159900 | -0.55321300 | 4.40309400  |
| C  | 2.50255600  | 1.94762800  | -4.68292600 |
| C  | 2.61498100  | 3.60199600  | -2.94087500 |

|   |             |             |             |
|---|-------------|-------------|-------------|
| C | 3.30947000  | 3.11439000  | -0.59695700 |
| H | 2.15541900  | 2.39854800  | 2.56325300  |
| H | 3.25246200  | -4.20569300 | -2.92201800 |
| C | 2.86167200  | -2.77813100 | -4.50999800 |
| C | 4.97794600  | -2.40595300 | -0.19962600 |
| C | 2.79733100  | -3.43548700 | -0.07261600 |
| H | 2.53920300  | -1.08256700 | -5.82041300 |
| H | -0.12371200 | 1.67173600  | 3.35448900  |
| H | 2.31678200  | 1.65163000  | -5.71941300 |
| C | 2.35993200  | 3.28177300  | -4.29026600 |
| H | 2.55321200  | 4.64218100  | -2.61869500 |
| C | 2.49893700  | 4.05084300  | 0.05158000  |
| C | 4.48614700  | 2.68988400  | 0.04593500  |
| C | 2.55652000  | -3.81286700 | -5.60073900 |
| H | 5.69025100  | -1.81592400 | -0.77596900 |
| C | 5.30651000  | -2.91050500 | 1.05847900  |
| C | 3.07304900  | -3.92213100 | 1.21768200  |
| H | 1.83810000  | -3.64229200 | -0.54960600 |
| C | 1.94162000  | 4.33710900  | -5.32304000 |
| H | 1.57474800  | 4.35386100  | -0.43830700 |
| C | 2.84708400  | 4.60326100  | 1.29093800  |
| C | 4.88881300  | 3.24557600  | 1.26287300  |
| H | 5.09819800  | 1.94652600  | -0.46424100 |
| C | 2.79986900  | -5.24766600 | -5.12627300 |
| C | 1.07830600  | -3.68647400 | -6.00596000 |
| C | 3.44629000  | -3.56169400 | -6.82709700 |
| C | 4.33019600  | -3.64911300 | 1.75391600  |
| C | 6.69620500  | -2.74004900 | 1.68314500  |
| C | 2.01099700  | -4.74799400 | 1.94784100  |
| C | 0.52547500  | 4.01735700  | -5.82882800 |
| C | 2.92085800  | 4.31936800  | -6.50677800 |
| C | 1.93215700  | 5.75236700  | -4.74032900 |
| C | 4.05273400  | 4.19916800  | 1.86824800  |
| C | 1.90450600  | 5.61445900  | 1.95292900  |
| C | 6.26151100  | 2.93123600  | 1.87008300  |
| H | 2.14709700  | -5.51698600 | -4.28198300 |
| H | 2.58739700  | -5.95339500 | -5.94441300 |
| H | 3.84409300  | -5.40100800 | -4.81350300 |
| H | 0.42280000  | -3.88652100 | -5.14383000 |
| H | 0.84585400  | -2.67699100 | -6.37804400 |
| H | 0.82453300  | -4.40709800 | -6.80106500 |
| H | 3.23455100  | -4.30011700 | -7.61763900 |
| H | 3.28346900  | -2.56176600 | -7.25541600 |
| H | 4.51116300  | -3.64046200 | -6.55904700 |
| H | 4.57950500  | -4.03667100 | 2.74223600  |
| C | 7.64738600  | -1.96831800 | 0.76643900  |
| C | 6.57839400  | -1.99285200 | 3.02009400  |
| C | 7.30257400  | -4.13074400 | 1.93308300  |
| C | 2.44752500  | -5.13760800 | 3.36102900  |
| C | 1.74923000  | -6.03579500 | 1.14987800  |
| C | 0.71390700  | -3.93477500 | 2.04267100  |
| H | -0.20332000 | 4.06018900  | -5.00426200 |
| H | 0.21051400  | 4.74263300  | -6.59720300 |
| H | 0.46958300  | 3.01130800  | -6.27144900 |
| H | 2.93713200  | 3.34196000  | -7.01107100 |
| H | 2.63760500  | 5.07637300  | -7.25641500 |
| H | 3.94548400  | 4.53685000  | -6.16789600 |
| H | 1.21325100  | 5.84970300  | -3.91305400 |
| H | 2.92531700  | 6.04649000  | -4.36777400 |
| H | 1.63920200  | 6.47476000  | -5.51805900 |
| H | 4.36097700  | 4.63861200  | 2.81567400  |
| C | 0.56320200  | 4.92939100  | 2.25507000  |
| C | 1.67154600  | 6.79086500  | 0.99200700  |
| C | 2.46775100  | 6.16458900  | 3.26429500  |
| C | 7.22516900  | 4.05257000  | 1.44626100  |
| C | 6.21250100  | 2.87750100  | 3.40367500  |
| C | 6.80290600  | 1.59439600  | 1.35926800  |
| H | 7.27607400  | -0.95962200 | 0.53957600  |
| H | 8.62873300  | -1.85973700 | 1.25330700  |
| H | 7.80511500  | -2.49579900 | -0.18642300 |
| H | 5.95373200  | -2.54265000 | 3.74073100  |
| H | 7.57166000  | -1.86195100 | 3.47823600  |
| H | 6.13969500  | -0.99380100 | 2.87973300  |
| H | 6.69531000  | -4.72676200 | 2.63050300  |
| H | 7.38512700  | -4.69591900 | 0.99201300  |
| H | 8.31143000  | -4.03577500 | 2.36584000  |
| H | 1.64675300  | -5.70939600 | 3.85401900  |

|   |             |             |            |
|---|-------------|-------------|------------|
| H | 3.34878200  | -5.76986100 | 3.35491700 |
| H | 2.65337700  | -4.25287300 | 3.98369700 |
| H | 0.97853600  | -6.64546500 | 1.64903900 |
| H | 1.39661900  | -5.81936200 | 0.13113000 |
| H | 2.66517300  | -6.64107100 | 1.06594500 |
| H | 0.85087400  | -3.03163400 | 2.65462700 |
| H | 0.35507600  | -3.59775700 | 1.06017900 |
| H | -0.09052300 | -4.52176500 | 2.50930000 |
| H | -0.17046300 | 5.66127100  | 2.62892300 |
| H | 0.14039100  | 4.45245400  | 1.36025300 |
| H | 0.67414600  | 4.14831700  | 3.02222200 |
| H | 1.00522000  | 7.53781600  | 1.45266700 |
| H | 2.62229400  | 7.28562800  | 0.74038500 |
| H | 1.20253800  | 6.46476800  | 0.05230700 |
| H | 2.63129000  | 5.36677900  | 4.00532800 |
| H | 3.42098000  | 6.69349900  | 3.11024700 |
| H | 1.75644500  | 6.88056100  | 3.70391500 |
| H | 8.23644300  | 3.86909700  | 1.84506100 |
| H | 7.29236400  | 4.11658800  | 0.34949600 |
| H | 6.88116100  | 5.02970200  | 1.81889700 |
| H | 5.50321400  | 2.11868400  | 3.76722400 |
| H | 7.20799500  | 2.62551000  | 3.80105900 |
| H | 5.92485800  | 3.84164300  | 3.84699600 |
| H | 6.08198100  | 0.77980900  | 1.52583600 |
| H | 7.02702300  | 1.61986300  | 0.28298000 |
| H | 7.73609100  | 1.33380100  | 1.88152900 |

#### 4.2.5 [(<sup>dtbp</sup>Cbz)Ca(C<sub>6</sub>H<sub>6</sub>)H]<sub>2</sub> – C<sub>6</sub>H<sub>6</sub> removed

|     |             |             |             |
|-----|-------------|-------------|-------------|
| 0 1 |             |             |             |
| Ca  | -1.33435700 | -1.07551100 | -0.03353600 |
| H   | -0.82256000 | 1.01408200  | -0.05830000 |
| N   | -2.77868600 | -1.31756800 | 1.81488100  |
| C   | -3.37567400 | -0.22852200 | 2.40892200  |
| C   | -4.30992600 | 0.67257400  | 1.85712400  |
| C   | -4.69197700 | 1.77113100  | 2.63213300  |
| H   | -5.42183300 | 2.45071000  | 2.18954500  |
| C   | -4.21575900 | 2.01544500  | 3.93631200  |
| C   | -3.32224200 | 1.09301500  | 4.48472900  |
| H   | -2.93543300 | 1.22956600  | 5.49880800  |
| C   | -2.90650500 | -0.01252700 | 3.74022900  |
| C   | -1.96216000 | -1.07033900 | 3.98605200  |
| C   | -1.10662400 | -1.37964200 | 5.04301600  |
| H   | -1.14349600 | -0.77570900 | 5.95397500  |
| C   | -0.17749200 | -2.42014400 | 4.92157000  |
| C   | -0.16963900 | -3.16015100 | 3.72323300  |
| H   | 0.52032900  | -3.99742700 | 3.61155100  |
| C   | -1.03607800 | -2.90877000 | 2.65144800  |
| C   | -1.93931200 | -1.82881300 | 2.77459400  |
| C   | -4.94319600 | 0.47065600  | 0.53045400  |
| C   | -5.71488800 | -0.67516000 | 0.29058400  |
| H   | -5.74486200 | -1.43683900 | 1.06943500  |
| C   | -6.45952400 | -0.81216000 | -0.88397300 |
| C   | -6.36661400 | 0.20825000  | -1.84233000 |
| H   | -6.94009500 | 0.11123900  | -2.76665100 |
| C   | -5.57889200 | 1.34966100  | -1.65804300 |
| C   | -4.87816100 | 1.46634200  | -0.45123500 |
| H   | -4.26623800 | 2.34343000  | -0.24286100 |
| C   | -7.36332700 | -2.02050000 | -1.15561300 |
| C   | -7.47197000 | -2.93890800 | 0.06343100  |
| H   | -6.49706900 | -3.34711000 | 0.36362100  |
| H   | -8.12966100 | -3.79107700 | -0.16772500 |
| H   | -7.89901300 | -2.40939900 | 0.92867900  |
| C   | -6.78924400 | -2.82182800 | -2.33454300 |
| H   | -6.71538800 | -2.20749200 | -3.24485000 |
| H   | -7.42880300 | -3.68967500 | -2.56331600 |
| H   | -5.78154000 | -3.19976000 | -2.10395900 |
| C   | -8.77821300 | -1.53743200 | -1.51027100 |
| H   | -8.79165100 | -0.92217500 | -2.42193600 |
| H   | -9.20276600 | -0.93560600 | -0.69207900 |
| H   | -9.44315200 | -2.39868500 | -1.68334700 |
| C   | -5.56396000 | 2.45008400  | -2.72672700 |
| C   | -5.32205000 | 1.85523300  | -4.12203000 |
| H   | -5.30751200 | 2.65555400  | -4.87868900 |
| H   | -6.10854800 | 1.14380300  | -4.41270900 |



|    |             |             |             |
|----|-------------|-------------|-------------|
| H  | -4.35855300 | 1.32696400  | -4.17659500 |
| C  | -6.93125800 | 3.15300000  | -2.70883800 |
| H  | -6.96468100 | 3.95772500  | -3.46128900 |
| H  | -7.13030900 | 3.59627300  | -1.72097100 |
| H  | -7.74635900 | 2.44686100  | -2.92873200 |
| C  | -4.47885100 | 3.49508600  | -2.45509700 |
| H  | -3.47317800 | 3.04613100  | -2.41420100 |
| H  | -4.64917600 | 4.02635400  | -1.50779000 |
| H  | -4.47251400 | 4.24881800  | -3.25727600 |
| C  | -4.65956900 | 3.22899000  | 4.76336000  |
| C  | -5.62183000 | 4.13757300  | 3.99437400  |
| H  | -5.16336700 | 4.53502700  | 3.07557800  |
| H  | -5.90579300 | 4.99708900  | 4.62132700  |
| H  | -6.54671500 | 3.61087700  | 3.71407400  |
| C  | -3.42733300 | 4.06052800  | 5.15410800  |
| H  | -2.90147000 | 4.42549800  | 4.25877500  |
| H  | -2.71031100 | 3.47253800  | 5.74635500  |
| H  | -3.72228100 | 4.93427800  | 5.75827000  |
| C  | -5.37265400 | 2.74567900  | 6.03571900  |
| H  | -5.69823100 | 3.60150800  | 6.64987200  |
| H  | -4.71505900 | 2.11852300  | 6.65602500  |
| H  | -6.26068700 | 2.14673900  | 5.78120700  |
| C  | 0.79993900  | -2.70702700 | 6.06798000  |
| C  | 1.62704800  | -1.44404500 | 6.35730600  |
| H  | 2.19873400  | -1.13708500 | 5.46769700  |
| H  | 2.34110400  | -1.62605200 | 7.17710700  |
| H  | 0.99109600  | -0.59552800 | 6.65014800  |
| C  | 0.01194300  | -3.10257800 | 7.32565800  |
| H  | -0.68058400 | -2.30620000 | 7.63701100  |
| H  | 0.69512500  | -3.30213000 | 8.16755800  |
| H  | -0.58417700 | -4.01008100 | 7.14345300  |
| C  | 1.77235400  | -3.84009100 | 5.73103500  |
| H  | 2.38196900  | -3.60497800 | 4.84480700  |
| H  | 1.24771700  | -4.78968100 | 5.54469600  |
| H  | 2.46214000  | -4.00246500 | 6.57386700  |
| C  | -0.99144100 | -3.77875800 | 1.45012600  |
| C  | 0.23017400  | -4.07723700 | 0.83750800  |
| H  | 1.12495600  | -3.57004500 | 1.20300600  |
| C  | 0.31864300  | -4.99842800 | -0.21576100 |
| C  | -0.85734100 | -5.62401200 | -0.63324700 |
| H  | -0.80525500 | -6.36723800 | -1.42808400 |
| C  | -2.10949500 | -5.33462000 | -0.06361300 |
| C  | -2.16286300 | -4.38604300 | 0.95985700  |
| H  | -3.10575100 | -4.12238400 | 1.43855700  |
| C  | 1.68756200  | -5.29998400 | -0.83030900 |
| C  | 2.34782200  | -3.99088200 | -1.28267600 |
| H  | 3.37888100  | -4.17325900 | -1.61957000 |
| H  | 2.37943100  | -3.23361700 | -0.48747000 |
| H  | 1.80815300  | -3.53338300 | -2.12490500 |
| C  | 2.55847200  | -5.97528000 | 0.24121300  |
| H  | 3.56306500  | -6.19079300 | -0.15763300 |
| H  | 2.10876100  | -6.92424200 | 0.57221300  |
| H  | 2.67746100  | -5.33514300 | 1.12687100  |
| C  | 1.59391600  | -6.23482500 | -2.03755900 |
| H  | 0.96301400  | -5.81099700 | -2.83494000 |
| H  | 1.18994300  | -7.22273600 | -1.76742300 |
| H  | 2.59677800  | -6.39387000 | -2.46268500 |
| C  | -3.34918300 | -6.13091500 | -0.48922900 |
| C  | -3.29366600 | -7.49390400 | 0.22087400  |
| H  | -4.17221800 | -8.10557700 | -0.04187200 |
| H  | -3.27706800 | -7.36511500 | 1.31383200  |
| H  | -2.38906500 | -8.05249200 | -0.06489900 |
| C  | -3.38269200 | -6.36467100 | -2.00635900 |
| H  | -3.39751500 | -5.41834300 | -2.56852500 |
| H  | -4.28947000 | -6.92677900 | -2.27836000 |
| H  | -2.52246300 | -6.95069100 | -2.36055700 |
| C  | -4.63985100 | -5.41349700 | -0.08840900 |
| H  | -4.66919600 | -4.38925900 | -0.48888200 |
| H  | -4.75930100 | -5.34779400 | 1.00275400  |
| H  | -5.51495300 | -5.95383700 | -0.48040600 |
| H  | 0.82258800  | -1.01408500 | 0.05842300  |
| Ca | 1.33438400  | 1.07552900  | 0.03361800  |
| N  | 2.77862800  | 1.31752700  | -1.81486200 |
| C  | 3.37561000  | 0.22843800  | -2.40883300 |
| C  | 1.93922800  | 1.82868700  | -2.77459800 |
| C  | 4.30991800  | -0.67257500 | -1.85699800 |
| C  | 2.90638100  | 0.01230400  | -3.74009700 |

|   |             |              |             |
|---|-------------|--------------|-------------|
| C | 1.96203700  | 1.07010500   | -3.98599100 |
| C | 1.03604800  | 2.90869600   | -2.65156400 |
| C | 4.69197800  | -1.77118200  | -2.63192900 |
| C | 4.94321500  | -0.47056800  | -0.53035000 |
| C | 3.32212400  | -1.09328900  | -4.48451800 |
| C | 1.10649700  | 1.37933300   | -5.04297500 |
| C | 0.16961100  | 3.16001600   | -3.72336400 |
| C | 0.99143900  | 3.77876300   | -1.45030000 |
| H | 5.42186100  | -2.45070900  | -2.18930400 |
| C | 4.21569600  | -2.01563800  | -3.93605600 |
| C | 5.71489700  | 0.67526100   | -0.29053700 |
| C | 4.87821400  | -1.46622600  | 0.45137600  |
| H | 2.93525200  | -1.22996100  | -5.49855600 |
| H | 1.14332500  | 0.77529300   | -5.95386400 |
| C | 0.17740400  | 2.41988400   | -4.92162100 |
| H | -0.52030300 | 3.99734700   | -3.61175500 |
| C | -0.23016300 | 4.07734800   | -0.83772000 |
| C | 2.16289800  | 4.38598100   | -0.96002500 |
| C | 4.65950200  | -3.22925700  | -4.76299400 |
| H | 5.74484700  | 1.43691600   | -1.06941400 |
| C | 6.45956300  | 0.81230800   | 0.88399700  |
| C | 5.57900700  | -1.34951300  | 1.65814600  |
| H | 4.26629300  | -2.34332700  | 0.24304100  |
| C | -0.80008600 | 2.70666500   | -6.06800600 |
| H | -1.12497800 | 3.57021200   | -1.20321700 |
| C | -0.31859000 | 4.99860900   | 0.21549000  |
| C | 2.10957100  | 5.33463300   | 0.06337600  |
| H | 3.10577500  | 4.12222400   | -1.43869300 |
| C | 5.62161300  | -4.13786100  | -3.99384800 |
| C | 3.42725900  | -4.06074200  | -5.15382800 |
| C | 5.37275800  | -2.74604900  | -6.03529900 |
| C | 6.36670500  | -0.20807800  | 1.84237900  |
| C | 7.36334700  | 2.02067300   | 1.15558800  |
| C | 5.56417600  | -2.44991400  | 2.72684700  |
| C | -1.62722300 | 1.44366200   | -6.35716500 |
| C | -0.01216300 | 3.10209400   | -7.32576600 |
| C | -1.77248000 | 3.83976200   | -5.73110200 |
| C | 0.85742500  | 5.62414000   | 0.63296800  |
| C | -1.68750000 | 5.30027600   | 0.82998700  |
| C | 3.34929300  | 6.13089700   | 0.48895000  |
| H | 5.16302300  | -4.53521700  | -3.07507000 |
| H | 5.90557600  | -4.99744000  | -4.62071400 |
| H | 6.54651100  | -3.61122200  | -3.71348600 |
| H | 2.90127500  | -4.425563100 | -4.25853300 |
| H | 2.71033400  | -3.47275000  | -5.74619100 |
| H | 3.72222400  | -4.93453900  | -5.75791200 |
| H | 5.69836300  | -3.60192500  | -6.64937400 |
| H | 4.71526100  | -2.11888700  | -6.65570400 |
| H | 6.26079200  | -2.14714100  | -5.78071600 |
| H | 6.94020400  | -0.11102400  | 2.76668400  |
| C | 7.47188500  | 2.93909300   | -0.06345800 |
| C | 6.78931300  | 2.82195900   | 2.33456900  |
| C | 8.77827700  | 1.53765600   | 1.51014700  |
| C | 5.32277500  | -1.85498800  | 4.12220200  |
| C | 6.93134600  | -3.15307400  | 2.70858200  |
| C | 4.47880600  | -3.49472300  | 2.45553600  |
| H | -2.19886900 | 1.13679500   | -5.46749900 |
| H | -2.34131900 | 1.62559900   | -7.17694700 |
| H | -0.99129700 | 0.59510800   | -6.64995300 |
| H | 0.68034700  | 2.30568600   | -7.63708000 |
| H | -0.69539300 | 3.30156000   | -8.16764800 |
| H | 0.58396500  | 4.00961600   | -7.14368700 |
| H | -2.38206500 | 3.60471900   | -4.84483100 |
| H | -1.24782700 | 4.78936200   | -5.54485400 |
| H | -2.46229800 | 4.00207600   | -6.57391700 |
| H | 0.80537200  | 6.36741800   | 1.42775800  |
| C | -2.34782000 | 3.99123200   | 1.28242500  |
| C | -2.55834800 | 5.97553300   | -0.24161100 |
| C | -1.59384300 | 6.23519500   | 2.03717700  |
| C | 3.29390800  | 7.49379400   | -0.22134200 |
| C | 3.38273200  | 6.36486800   | 2.00604700  |
| C | 4.63993900  | 5.41334300   | 0.08829900  |
| H | 6.49696100  | 3.34729600   | -0.36356800 |
| H | 8.12959500  | 3.79125900   | 0.16764900  |
| H | 7.89885700  | 2.40958800   | -0.92874400 |
| H | 6.71554900  | 2.20760000   | 3.24486700  |
| H | 7.42884700  | 3.68983100   | 2.56331400  |

|   |             |             |             |
|---|-------------|-------------|-------------|
| H | 5.78157300  | 3.19984400  | 2.10406400  |
| H | 8.79181100  | 0.92241000  | 2.42181600  |
| H | 9.20279100  | 0.93584100  | 0.69192700  |
| H | 9.44319600  | 2.39893700  | 1.68316500  |
| H | 5.30833000  | -2.65528100 | 4.87889200  |
| H | 6.10947500  | -1.14367800 | 4.41262700  |
| H | 4.35937900  | -1.32655900 | 4.17702800  |
| H | 6.96483300  | -3.95780400 | 3.46102400  |
| H | 7.13004600  | -3.59638300 | 1.72066000  |
| H | 7.74663200  | -2.44707900 | 2.92825000  |
| H | 3.47320000  | -3.04559200 | 2.41494500  |
| H | 4.64875900  | -4.02600700 | 1.50817100  |
| H | 4.47258400  | -4.24846600 | 3.25770400  |
| H | -3.37888200 | 4.17368300  | 1.61927500  |
| H | -2.37943200 | 3.23392100  | 0.48726600  |
| H | -1.80818700 | 3.53376300  | 2.12469300  |
| H | -3.56293100 | 6.19116600  | 0.15719800  |
| H | -2.10855800 | 6.92442600  | -0.57269900 |
| H | -2.67737600 | 5.33531400  | -1.12720700 |
| H | -0.96296300 | 5.81139900  | 2.83459400  |
| H | -1.18984000 | 7.22307800  | 1.76698500  |
| H | -2.59670700 | 6.39429700  | 2.46227800  |
| H | 4.17248200  | 8.10544700  | 0.04137600  |
| H | 3.27737000  | 7.36485500  | -1.31428400 |
| H | 2.38932400  | 8.05247600  | 0.06429800  |
| H | 3.39741300  | 5.41862100  | 2.56835200  |
| H | 4.28955300  | 6.92691800  | 2.27802500  |
| H | 2.52254400  | 6.95103200  | 2.36010300  |
| H | 4.66917100  | 4.38913700  | 0.48886400  |
| H | 4.75946800  | 5.34752900  | -1.00284900 |
| H | 5.51505300  | 5.95364900  | 0.48031300  |

#### 4.2.6 [(<sup>dtbp</sup>Cbz)Ca(C<sub>6</sub>H<sub>6</sub>)H]<sub>2</sub> – flanking arene removed

|     |             |             |             |
|-----|-------------|-------------|-------------|
| 0 1 |             |             |             |
| Ca  | -1.33435700 | -1.07551100 | -0.03353600 |
| H   | -0.82256000 | 1.01408200  | -0.05830000 |
| N   | -2.77868600 | -1.31756800 | 1.81488100  |
| C   | -3.37567400 | -0.22852200 | 2.40892200  |
| C   | -4.30992600 | 0.67257400  | 1.85712400  |
| C   | -4.69197700 | 1.77113100  | 2.63213300  |
| H   | -5.42183300 | 2.45071000  | 2.18954500  |
| C   | -4.21575900 | 2.01544500  | 3.93631200  |
| C   | -3.32224200 | 1.09301500  | 4.48472900  |
| H   | -2.93543300 | 1.22956600  | 5.49880800  |
| C   | -2.90650500 | -0.01252700 | 3.74022900  |
| C   | -1.96216000 | -1.07033900 | 3.98605200  |
| C   | -1.10662400 | -1.37964200 | 5.04301600  |
| H   | -1.14349600 | -0.77570900 | 5.95397500  |
| C   | -0.17749200 | -2.42014400 | 4.92157000  |
| C   | -0.16963900 | -3.16015100 | 3.72323300  |
| H   | 0.52032900  | -3.99742700 | 3.61155100  |
| C   | -1.03607800 | -2.90877000 | 2.65144800  |
| C   | -1.93931200 | -1.82881300 | 2.77459400  |
| C   | -4.65956900 | 3.22899000  | 4.76336000  |
| C   | -5.62183000 | 4.13757300  | 3.99437400  |
| H   | -5.16336700 | 4.53502700  | 3.07557800  |
| H   | -5.90579300 | 4.99708900  | 4.62132700  |
| H   | -6.54671500 | 3.61087700  | 3.71407400  |
| C   | -3.42733300 | 4.06052800  | 5.15410800  |
| H   | -2.90147000 | 4.42549800  | 4.25877500  |
| H   | -2.71031100 | 3.47253800  | 5.74635500  |
| H   | -3.72228100 | 4.93427800  | 5.75827000  |
| C   | -5.37265400 | 2.74567900  | 6.03571900  |
| H   | -5.69823100 | 3.60150800  | 6.64987200  |
| H   | -4.71505900 | 2.11852300  | 6.65602500  |
| H   | -6.26068700 | 2.14673900  | 5.78120700  |
| C   | 0.79993900  | -2.70702700 | 6.06798000  |
| C   | 1.62704800  | -1.44404500 | 6.35730600  |
| H   | 2.19873400  | -1.13708500 | 5.46769700  |
| H   | 2.34110400  | -1.62605200 | 7.17710700  |
| H   | 0.99109600  | -0.59552800 | 6.65014800  |
| C   | 0.01194300  | -3.10257800 | 7.32565800  |
| H   | -0.68058400 | -2.30620000 | 7.63701100  |
| H   | 0.69512500  | -3.30213000 | 8.16755800  |
| H   | -0.58417700 | -4.01008100 | 7.14345300  |
| C   | 1.77235400  | -3.84009100 | 5.73103500  |

|    |             |             |             |
|----|-------------|-------------|-------------|
| H  | 2.38196900  | -3.60497800 | 4.84480700  |
| H  | 1.24771700  | -4.78968100 | 5.54469600  |
| H  | 2.46214000  | -4.00246500 | 6.57386700  |
| C  | -2.47049000 | -2.53819400 | -2.25844400 |
| H  | -3.01930400 | -3.44181700 | -1.99197500 |
| C  | -1.10678300 | -2.61898500 | -2.56059500 |
| H  | -0.60507000 | -3.58750000 | -2.52411000 |
| C  | -0.38501700 | -1.45861600 | -2.86743200 |
| H  | 0.68563200  | -1.50512700 | -3.08255500 |
| C  | -1.03622000 | -0.22082200 | -2.87330800 |
| H  | -0.48016000 | 0.68999000  | -3.09088700 |
| C  | -2.39995300 | -0.14425100 | -2.57763100 |
| H  | -2.89498100 | 0.82612300  | -2.54655400 |
| C  | -3.12359700 | -1.29872100 | -2.27011700 |
| H  | -4.18242900 | -1.22372500 | -2.01674400 |
| H  | 0.82258800  | -1.01408500 | 0.05842300  |
| Ca | 1.33438400  | 1.07552900  | 0.03361800  |
| N  | 2.77862800  | 1.31752700  | -1.81486200 |
| C  | 3.12347400  | 1.29875500  | 2.27029200  |
| C  | 3.37561000  | 0.22843800  | -2.40883300 |
| C  | 2.39972300  | 0.14434500  | 2.57778800  |
| H  | 2.89467000  | -0.82607500 | 2.54675600  |
| C  | 1.93922800  | 1.82868700  | -2.77459800 |
| C  | 2.47045500  | 2.53827600  | 2.25854700  |
| H  | 4.18232300  | 1.22368100  | 2.01700400  |
| C  | 4.30991800  | -0.67257500 | -1.85699800 |
| C  | 2.90638100  | 0.01230400  | -3.74009700 |
| C  | 1.03597800  | 0.22102900  | 2.87339200  |
| C  | 1.96203700  | 1.07010500  | -3.98599100 |
| C  | 1.03604800  | 2.90869600  | -2.65156400 |
| H  | 3.01935200  | 3.44184800  | 1.99207300  |
| C  | 1.10673500  | 2.61917500  | 2.56061600  |
| C  | 4.69197800  | -1.77118200 | -2.63192900 |
| C  | 3.32212400  | -1.09328900 | -4.48451800 |
| C  | 0.38486800  | 1.45887200  | 2.86746200  |
| H  | 0.47983900  | -0.68973900 | 3.09094600  |
| C  | 1.10649700  | 1.37933300  | -5.04297500 |
| C  | 0.16961100  | 3.16001600  | -3.72336400 |
| H  | 0.60509300  | 3.58772400  | 2.52407100  |
| H  | 5.42186100  | -2.45070900 | -2.18930400 |
| C  | 4.21569600  | -2.01563800 | -3.93605600 |
| H  | 2.93525200  | -1.22996100 | -5.49855600 |
| H  | -0.68578700 | 1.50546600  | 3.08253700  |
| H  | 1.14332500  | 0.77529300  | -5.95386400 |
| C  | 0.17740400  | 2.41988400  | -4.92162100 |
| H  | -0.52030300 | 3.99734700  | -3.61175500 |
| C  | 4.65950200  | -3.22925700 | -4.76299400 |
| C  | -0.80008600 | 2.70666500  | -6.06800600 |
| C  | 5.62161300  | -4.13786100 | -3.99384800 |
| C  | 3.42725900  | -4.06074200 | -5.15382800 |
| C  | 5.37275800  | -2.74604900 | -6.03529900 |
| C  | -1.62722300 | 1.443366200 | -6.35716500 |
| C  | -0.01216300 | 3.10209400  | -7.32576600 |
| C  | -1.77248000 | 3.83976200  | -5.73110200 |
| H  | 5.16302300  | -4.53521700 | -3.07507000 |
| H  | 5.90557600  | -4.99744000 | -4.62071400 |
| H  | 6.54651100  | -3.61122200 | -3.71348600 |
| H  | 2.90127500  | -4.42563100 | -4.25853300 |
| H  | 2.71033400  | -3.47275000 | -5.74619100 |
| H  | 3.72222400  | -4.93453900 | -5.75791200 |
| H  | 5.69836300  | -3.60192500 | -6.64937400 |
| H  | 4.71526100  | -2.11888700 | -6.65570400 |
| H  | 6.26079200  | -2.14714100 | -5.78071600 |
| H  | -2.19886900 | 1.13679500  | -5.46749900 |
| H  | -2.34131900 | 1.62559900  | -7.17694700 |
| H  | -0.99129700 | 0.59510800  | -6.64995300 |
| H  | 0.68034700  | 2.30568600  | -7.63708000 |
| H  | -0.69539300 | 3.30156000  | -8.16764800 |
| H  | 0.58396500  | 4.00961600  | -7.14368700 |
| H  | -2.38206500 | 3.60471900  | -4.84483100 |
| H  | -1.24782700 | 4.78936200  | -5.54485400 |
| H  | -2.46229800 | 4.00207600  | -6.57391700 |
| H  | 1.00388226  | 3.53606593  | -1.78538138 |
| H  | 4.76658085  | -0.52691018 | -0.90036808 |
| H  | -1.00389211 | -3.53608234 | 1.78522442  |
| H  | -4.76657060 | 0.52697297  | 0.90047566  |

## 5 References

- [1] A. Hinz, *Chem. A. Eur. J.*, 2019, **25**, 3267-3271.
- [2] T. K. Panda, C. G. Hrib, P. G. Jones, J. Jenter, P. W. Roesky and M. Tamm, *Eur. J. Inorg. Chem.*, 2008, 4270-4279.
- [3] M. Westerhausen, *Inorg. Chem.*, 1991, **30**, 96-101.
- [4] X. Wu, G. Ding, W. Lu, L. Yang, J. Wang, Y. Zhang, X. Xie and Z. Zhang, *Org. Lett.*, 2021, **23**, 1434-1439.
- [5] G. R. Fulmer, A. J. M. Miller, N. H. Sherden, H. E. Gottlieb, A. Nudelman, B. M. Stoltz, J. E. Bercaw, K. I. Goldberg, *Organometallics* **2010**, *29*, 2176–2179.
- [6] G. M. Sheldrick, *Acta Crystallogr. Sect. A* **2008**, *64*, 112–122.
- [7] G. M. Sheldrick, *Acta Crystallogr. A* **2015**, *71*, 3–8.
- [8] G. M. Sheldrick, *Acta Crystallogr. C* **2015**, *71*, 3–8.
- [9] C. B. Hübschle, G. M. Sheldrick, B. Dittrich, *J. Appl. Crystallogr.* **2011**, *44*, 1281–1284.
- [10] M. J. Frisch, G. W. Trucks, H. B. Schlegel, G. E. Scuseria, M. A. Robb, J. R. Cheeseman, G. Scalmani, V. Barone, B. Mennucci, G. A. Petersson, et al., *Gaussian 16, Revision B.01*, **2016**.
- [11] Y. Wang, M. Dolg, *Theor. Chem. Acc.* **1998**, *100*, 124.
